# Supplementary material
Source: publisher figshare collection journal article supplement (https://diabetesjournals.figshare.com/articles/dataset/_/24379414)
Supplement: Supplementary file 1 [file 1]

**Supplemental Table 5. Clinical characteristics of study subjects.**

|                         | Non-DM                    | Pre-DM                    | DM                                        |
|-------------------------|---------------------------|---------------------------|-------------------------------------------|
| Number<br>(male/female) | 5 (2/3)                   | 6 (1/5)                   | 6 (3/3)                                   |
| Age, years              | 67.8 ± 7.8                | 71.2 ± 2.8                | 70.8 ± 7.8                                |
| BMI, kg/m <sup>2</sup>  | 21.9 ± 1.5                | 20.9 ± 1.4                | 19.9 ± 1.2                                |
| HbA1c, %<br>(mmol/mol)  | 5.4 ± 0.1<br>(35.8 ± 1.4) | 6.0 ± 0.1<br>(42.7 ± 0.9) | 8.0 ± 0.5 <sup>A, B</sup><br>(64.2 ± 5.2) |

Values are expressed means ± SEM. One-way ANOVA followed by Bonferroni's post hoc test. <sup>A</sup>*P* <0.01 vs. Non-DM. <sup>B</sup>*P* <0.05 vs. Pre-DM.
