# Supplementary material
Source: publisher figshare collection journal article supplement (https://diabetesjournals.figshare.com/articles/dataset/_/24379414)
Supplement: Supplementary file 1 [file 1]

## Sheet: Anxa10_positive_corellation
Supplemental Table 6. Gene network analysis of the correlation of Anxa10 with genes in pancreatic β cells from 6-week-old db/db mice.
Anxa10 positive correlated ranked genes in 6-wekk-old-db/db
Gene	Degree	PageRank w/o weight	PageRank w/ weight	Rarity	Personalized_Anxa10
Anxa10	198	4.75127e-05	4.74117e-05	2.48817e-05	0.1507
Atp5mpl	495	8.60299e-05	8.64787e-05	0.000108772	0.00150158
Tomm6	415	9.80779e-05	9.87292e-05	0.000200983	0.00149089
Snurf	476	9.54279e-05	9.58619e-05	0.000241321	0.00148733
Atp5l	589	0.000104459	0.000105305	0.000294079	0.001482
Snhg14	542	9.84512e-05	9.90189e-05	0.000213586	0.0014546
Snrpn	618	0.000111042	0.000111912	0.000368247	0.00145008
Cd63	826	0.000118127	0.000119069	0.000236875	0.00144316
Tmsb10	538	0.000105691	0.000106643	0.000242059	0.00143868
Rpl39	650	0.000100304	0.000101178	0.000212508	0.00142116
Dclre1c	529	0.000100392	0.000101103	0.000137697	0.00141787
Ndufa13	880	0.000118641	0.000119637	0.000190842	0.0014069
Cox6b1	564	8.28192e-05	8.32059e-05	0.00012362	0.00140257
Nme1	698	0.000101497	0.000102194	0.000148128	0.00139932
Ndufa4	622	8.69874e-05	8.7346e-05	9.71838e-05	0.00139313
Pbld1	535	8.72313e-05	8.74111e-05	4.78558e-05	0.00138656
Gm12338	480	9.07925e-05	9.15016e-05	0.000442731	0.00138022
Sec61g	682	9.5447e-05	9.61093e-05	0.000205655	0.0013794
Atp5k	510	8.07693e-05	8.11941e-05	0.000100607	0.00137449
Mfge8	366	0.000111346	0.00011188	0.000128862	0.00137128
Cox6a1	676	8.74274e-05	8.79326e-05	0.0001505	0.00136539
Mydgf	861	0.00012053	0.000121692	0.000200195	0.00135751
Pam16	592	9.55743e-05	9.62948e-05	0.000112715	0.00135184
Uqcr11	537	9.60111e-05	9.68968e-05	0.000227021	0.00134852
Gm5566	723	9.65895e-05	9.7338e-05	0.000395452	0.00134525
Cox7a2	752	9.82082e-05	9.8661e-05	0.000135284	0.001341
Trappc2l	795	0.000104421	0.000104822	7.18924e-05	0.00133318
Cd164l2	470	9.63171e-05	9.67017e-05	8.5832e-05	0.00133275
Selenom	601	0.000109211	0.000110362	0.000419975	0.00132429
Polr2f	823	0.000105045	0.000105405	0.000162241	0.00132143
Lsm1	378	7.94557e-05	7.94066e-05	4.27137e-05	0.00131862
Polr2l	441	0.000114926	0.000115732	0.000157764	0.00131651
Dynll1	312	7.64872e-05	7.67103e-05	7.55024e-05	0.00131527
Tnfrsf12a	437	0.000101991	0.000102476	9.69742e-05	0.00131299
Rnasek	828	0.00011009	0.0001108	0.000162658	0.00131215
Atp5e	547	0.00010534	0.000106491	0.000440719	0.00131108
Capsl	679	0.000109912	0.000110402	7.74725e-05	0.0013098
Ndufa2	791	9.99266e-05	0.000100782	0.000136457	0.0013011
Nme2	776	9.86209e-05	9.9494e-05	0.000396262	0.00129843
Krt7	527	0.000113379	0.000113809	0.000113737	0.00129827
Bex2	828	0.000113516	0.000114488	0.000176718	0.00129702
BC048507	246	6.77529e-05	6.77985e-05	5.75592e-05	0.00129549
Emc7	723	0.000109762	0.000110788	0.000185428	0.00129165
Timm17a	1057	0.000120164	0.000121017	0.000156575	0.00129072
Mt3	319	7.25693e-05	7.28983e-05	5.23317e-05	0.00129006
Cox14	612	7.80876e-05	7.83349e-05	7.03552e-05	0.00128667
Snx15	700	9.88343e-05	9.87666e-05	4.37265e-05	0.00128656
Cox6c	575	9.47882e-05	9.5498e-05	0.000153283	0.00128423
Ndufb6	715	8.72489e-05	8.7563e-05	7.20127e-05	0.00128408
Prrg2	962	0.000111546	0.000112267	0.000111896	0.00128373
Rin1	175	6.03272e-05	6.04401e-05	4.70345e-05	0.00128238
Gm2225	852	0.000109147	0.000110222	0.000389246	0.00127519
Ndufb8	1092	0.00012556	0.000126666	0.000224322	0.00127301
S100a10	756	9.36115e-05	9.39229e-05	0.000105419	0.00127293
Hacd2	666	0.000100892	0.000100893	7.18554e-05	0.00127282
Mrpl57	652	9.27959e-05	9.35675e-05	9.66185e-05	0.00127029
Rps25	803	0.000105518	0.000106665	0.000403758	0.00127026
Mrpl53	532	9.6568e-05	9.7059e-05	7.28488e-05	0.00126713
Swi5	342	0.000113985	0.000114777	0.000244893	0.00126697
Krtcap2	432	9.40203e-05	9.50166e-05	0.000239826	0.00126595
Vma21	581	0.000110927	0.000112153	0.000235425	0.00126336
Pfn1	1211	0.000130128	0.000131232	0.000276261	0.00126312
Cox7c	509	9.09452e-05	9.18192e-05	0.000467433	0.00126053
Card19	1092	0.000121247	0.00012187	0.000142263	0.00125717
Tomm7	555	9.66476e-05	9.74402e-05	0.000161452	0.00125224
Uqcrq	561	7.51225e-05	7.52834e-05	7.83493e-05	0.00125059
Cox16	426	8.66809e-05	8.72388e-05	0.00010816	0.00124969
Nlrc3	256	7.37823e-05	7.38424e-05	5.3807e-05	0.00124938
Ost4	465	8.11224e-05	8.16253e-05	7.48888e-05	0.00124507
Atp5g1	434	7.7471e-05	7.79005e-05	9.2433e-05	0.00124218
Smim26	483	8.13551e-05	8.17492e-05	4.7084e-05	0.00123835
Cisd3	702	0.00010043	0.000100766	5.9041e-05	0.00123826
Ndufv3	342	8.95639e-05	9.0357e-05	0.000154073	0.00123474
Dynlrb1	1129	0.000122159	0.000123125	0.000171957	0.00123438
Gm17756	661	9.1921e-05	9.25095e-05	0.000114283	0.00123289
Cnbd2	892	0.000102639	0.000103424	9.79797e-05	0.00123195
Ufm1	1149	0.000124139	0.000125323	0.00022462	0.00123029
Tmem234	1193	0.000121904	0.000122919	0.000273445	0.00122874
Rnaset2b	388	0.000122647	0.000123787	0.000743455	0.00122858
Gm16174	340	6.7596e-05	6.73747e-05	4.3963e-05	0.00122534
Susd4	689	0.000107635	0.000108017	6.343e-05	0.00122497
Cycs	885	9.68948e-05	9.72617e-05	6.12506e-05	0.00121948
Atp5j2	1083	0.000116945	0.000118279	0.00024921	0.00121874
Slirp	634	7.7355e-05	7.75114e-05	5.73363e-05	0.00121635
Cops9	628	9.77086e-05	9.85034e-05	0.000123013	0.00121441
Rpl38	880	0.000101715	0.000102727	0.000215777	0.00121402
Rpl35	737	0.000100084	0.000101127	0.000304096	0.00121382
Pbdc1	855	9.46142e-05	9.49152e-05	5.19235e-05	0.00121167
Nol12	444	0.000101344	0.000101766	6.00372e-05	0.0012115
Sra1	695	9.83491e-05	9.92116e-05	8.66605e-05	0.00120588
Rpl32l	902	0.000103506	0.000104434	0.000178513	0.00120317
Ubl5	291	0.000114629	0.000115202	0.000173948	0.00119981
Uqcrh	350	0.000104257	0.000105052	0.000305531	0.00119921
Hsbp1	1069	0.00010971	0.000110403	0.000144914	0.00119733
Jpt1	480	8.22966e-05	8.23032e-05	3.86007e-05	0.001194
Ndufa12	727	9.00078e-05	9.03496e-05	6.57144e-05	0.00119339
Cdh3	633	8.54226e-05	8.59627e-05	5.34948e-05	0.0011927
Lxn	406	8.15259e-05	8.19481e-05	4.00099e-05	0.00119125
Cox5b	797	8.82608e-05	8.85911e-05	0.000122095	0.00119027
Smdt1	724	9.82287e-05	9.91508e-05	0.000104067	0.00118952
Gm31458	357	9.65467e-05	9.73037e-05	0.000703337	0.00118772
Rexo2	642	8.57344e-05	8.62025e-05	6.34951e-05	0.00118581
Gm15151	262	9.7195e-05	9.75936e-05	0.00011278	0.00118517
Decr1	1031	0.000109297	0.000109743	7.60728e-05	0.00118377
Abcg2	831	0.000102382	0.000102367	4.65365e-05	0.00118036
Rnaset2a	366	0.000121957	0.000122966	0.000707632	0.00117986
Abracl	245	5.41774e-05	5.41812e-05	2.79434e-05	0.00117926
Gsdma	280	6.50555e-05	6.49221e-05	6.48709e-05	0.00117904
Ceacam1	308	7.78653e-05	7.78948e-05	0.000111424	0.00117874
Eny2	501	6.83261e-05	6.83903e-05	3.20057e-05	0.00117458
Mrpl51	831	9.14943e-05	9.19518e-05	7.2277e-05	0.00117267
Rpl37a	737	9.56037e-05	9.6433e-05	0.000192313	0.00117258
Ndufb9	1040	0.000107404	0.000108002	0.000171263	0.00116944
Tatdn1	341	6.00146e-05	5.97886e-05	2.30168e-05	0.0011634
Uqcrh-ps1	419	7.8791e-05	7.90431e-05	4.79289e-05	0.00116281
Naa38	679	8.7055e-05	8.74562e-05	4.39097e-05	0.00116218
Churc1	945	0.00010488	0.000105079	7.28431e-05	0.00116039
Rps27l	592	7.05352e-05	7.06593e-05	5.85203e-05	0.00115393
Rem2	427	8.18005e-05	8.17656e-05	6.8316e-05	0.00115206
Sec61b	490	7.83771e-05	7.8914e-05	6.00628e-05	0.00115155
Tubg1	843	9.18359e-05	9.19858e-05	5.59019e-05	0.00115144
Lamtor2	876	9.57928e-05	9.62062e-05	5.61194e-05	0.00115023
Ppa1	933	0.00011027	0.000110491	5.20559e-05	0.00114873
1500009L16Rik	322	8.95806e-05	8.97572e-05	6.36754e-05	0.00114768
Srp19	607	7.80703e-05	7.80593e-05	6.39542e-05	0.00114365
Rpl41	320	9.79667e-05	9.85844e-05	0.000553348	0.00114103
Tuba4a	397	7.23933e-05	7.23252e-05	3.02722e-05	0.00113664
Spry2	341	9.45407e-05	9.45186e-05	6.73209e-05	0.00113486
Ndufc1	446	7.33048e-05	7.36441e-05	4.62093e-05	0.00113003
Rsph1	684	8.33274e-05	8.30587e-05	3.70598e-05	0.0011295
Rps28	357	8.39081e-05	8.45481e-05	0.000200039	0.00112869
Vps28	953	0.000102691	0.000103036	0.000139212	0.00112759
Ceacam2	443	8.60134e-05	8.59584e-05	0.000143105	0.00112162
Dnajc4	409	7.52487e-05	7.53367e-05	3.05686e-05	0.0011186
Gtf2h5	914	9.80947e-05	9.8216e-05	7.4744e-05	0.00111306
Rmdn2	328	5.22762e-05	5.19494e-05	1.82585e-05	0.00111211
Uqcrb	153	4.02683e-05	4.01611e-05	2.29227e-05	0.00111076
Ndufa7	885	9.01863e-05	9.04029e-05	6.45944e-05	0.00110912
Tmem208	231	9.51722e-05	9.56516e-05	0.000127627	0.00110137
Ndufb3	1096	0.000106739	0.000107201	8.54738e-05	0.00110082
Acsbg1	290	0.000119195	0.000119566	0.000213511	0.00110006
Gm45928	606	7.78985e-05	7.8259e-05	7.90846e-05	0.00109817
Ccdc59	651	7.54468e-05	7.54303e-05	3.11788e-05	0.00108924
Vcpkmt	247	5.20879e-05	5.1946e-05	1.97187e-05	0.00108833
Mien1	714	8.15977e-05	8.1958e-05	4.44124e-05	0.00108537
Tmem258	426	6.88588e-05	6.90904e-05	4.71652e-05	0.00108484
Pold4	748	8.59802e-05	8.63956e-05	8.72609e-05	0.00108483
Cox17	727	8.23425e-05	8.25271e-05	9.35745e-05	0.00107584
Gm38699	220	6.49654e-05	6.49016e-05	2.83007e-05	0.0010698
Meig1	162	6.04077e-05	6.04145e-05	3.45966e-05	0.00106697
Mrpl41	657	8.2415e-05	8.2207e-05	4.90841e-05	0.00105388
Mrpl33	747	8.19041e-05	8.21318e-05	4.72973e-05	0.00104048
Kdm2b	287	5.56374e-05	5.55141e-05	3.47268e-05	0.00103894
2210408F21Rik	193	7.43049e-05	7.42357e-05	3.99489e-05	0.00102288
Dnajc19	202	4.01112e-05	3.99561e-05	5.70688e-05	0.00102078
Gm17634	188	8.17759e-05	8.16993e-05	4.3464e-05	0.00102042
Atox1	877	8.85834e-05	8.88262e-05	0.000133368	0.00101303
Gm16342	268	4.28705e-05	4.25689e-05	1.68039e-05	0.00101169
Arl1	196	5.5927e-05	5.57091e-05	2.29809e-05	0.00100444
Kcnmb1	171	4.09373e-05	4.07812e-05	2.55526e-05	0.00100194
Rimklb	202	3.90988e-05	3.88309e-05	1.84054e-05	0.000999095
Nop10	262	4.51524e-05	4.50717e-05	2.14116e-05	0.000993604
Nos1	81	3.09296e-05	3.0751e-05	1.76021e-05	0.000987792
Gm10705	380	5.84629e-05	5.84739e-05	0.000213017	0.000985455
Gm8909	427	6.58807e-05	6.57067e-05	4.32331e-05	0.000980445
Pter	117	3.46522e-05	3.44082e-05	1.59849e-05	0.000975013
Haus1	186	4.26308e-05	4.23212e-05	1.81656e-05	0.000971914
Abhd1	102	2.75691e-05	2.7392e-05	1.54159e-05	0.000967892
S100a11	631	7.42439e-05	7.41832e-05	6.07388e-05	0.000963378
Faim2	252	4.22482e-05	4.20472e-05	2.07869e-05	0.000961323
4833422C13Rik	176	3.49307e-05	3.46591e-05	1.49546e-05	0.000960241
Gm37065	102	3.56951e-05	3.56198e-05	2.1526e-05	0.000951766
Gm10145	309	5.3274e-05	5.32356e-05	0.000207642	0.000945487
Plat	184	4.78704e-05	4.77155e-05	3.62865e-05	0.000944148
Gm15396	344	4.74468e-05	4.72028e-05	2.22566e-05	0.00093913
Gsdma3	104	4.14376e-05	4.13819e-05	4.98699e-05	0.000918083
Fbxo36	378	5.4574e-05	5.4224e-05	2.55865e-05	0.000900725
Ang	95	4.50389e-05	4.48484e-05	3.04601e-05	0.000896652
Cd40	490	5.91543e-05	5.88515e-05	3.0298e-05	0.000895387
Tubg2	121	3.00664e-05	2.99675e-05	2.01314e-05	0.000895204
Tgfb1	176	5.04895e-05	5.0339e-05	3.55558e-05	0.000892117
St8sia5	94	6.04392e-05	6.08261e-05	6.67033e-05	0.000886563
Yif1b	127	3.9128e-05	3.89844e-05	2.6509e-05	0.000884539
Thyn1	61	2.39644e-05	2.38674e-05	1.65576e-05	0.000867321
H2-Q5	144	2.90941e-05	2.90252e-05	3.22065e-05	0.000861751
Tmigd3	45	2.67938e-05	2.6677e-05	1.93784e-05	0.000856363
Platr26	54	3.64186e-05	3.63541e-05	2.72268e-05	0.000851989
Gm16357	61	2.15254e-05	2.14209e-05	1.48872e-05	0.00085063
Gm16150	86	3.19344e-05	3.17596e-05	1.9116e-05	0.000849155
Gm13288	105	2.52588e-05	2.51038e-05	1.50224e-05	0.000841933
B020004C17Rik	85	2.72693e-05	2.70431e-05	1.22555e-05	0.000834668
Mir682	44	2.83765e-05	2.8198e-05	1.87692e-05	0.000826333
Gm39929	143	2.65849e-05	2.6307e-05	1.26916e-05	0.000817891
Dnajc19-ps	66	2.31717e-05	2.31115e-05	4.72017e-05	0.000804867
Gm14305	43	1.88475e-05	1.8737e-05	1.23235e-05	0.000786861
Rab32	27	1.64976e-05	1.64637e-05	1.32258e-05	0.000778797
Cldn1	28	2.30453e-05	2.29472e-05	1.77134e-05	0.000759761
Gtpbp8	24	1.82141e-05	1.80873e-05	1.28587e-05	0.000748374
4930455G09Rik	13	1.73699e-05	1.74332e-05	2.09794e-05	0.000722836
Sri	723	0.000121837	0.000122807	0.000224457	0.000600357
Rps19	960	0.000110548	0.000111576	0.000138612	0.000594947
Cox8a	1119	0.000122305	0.000123568	0.000187741	0.000593194
Rwdd1	733	0.000115871	0.000116725	0.000149011	0.000591051
Cux1	889	0.000119908	0.000120451	8.3642e-05	0.000589219
Gm12693	584	0.000103706	0.000104315	9.64271e-05	0.000580176
Arhgdig	828	0.000107142	0.000107544	6.08981e-05	0.000577508
Vgf	446	0.000118798	0.00011976	0.000178931	0.00057662
Tmem176b	750	0.000107928	0.000108957	0.000155827	0.000576404
Ndufb5	521	0.000109762	0.000110673	0.000205603	0.000575125
Tmem98	622	0.000115418	0.000116422	0.000254389	0.000566776
Trnp1	718	0.000109682	0.000110022	8.18838e-05	0.000566516
Rpl29	896	0.000111333	0.00011215	0.000270499	0.000565344
Bud31	920	0.000111071	0.000112051	0.000118497	0.000564347
Arpc3	690	0.00011028	0.00011081	8.29286e-05	0.000563119
Npdc1	773	0.000119091	0.000120003	0.000211698	0.000561705
Uba52	815	0.000105136	0.000106073	0.000272654	0.000561338
Tmem128	700	0.000114168	0.000114805	0.000129459	0.000560044
Anxa5	1274	0.000135326	0.000136461	0.000197258	0.000555963
Tecr	903	0.00011613	0.00011711	0.000183355	0.000555357
Rgs17	916	0.000115343	0.000115758	7.42598e-05	0.000553948
Cadm1	550	0.000106943	0.00010763	9.50506e-05	0.000553749
Slc35f3	1198	0.000128162	0.000129356	0.000185836	0.000551102
Atpif1	539	9.401e-05	9.47526e-05	0.00010315	0.000550978
Gm6988	788	0.000102257	0.000103262	0.000376502	0.000547993
Shisa5	1041	0.000125981	0.000126694	0.00012055	0.000547307
Gm29376	931	0.00010907	0.000109929	0.000232034	0.000544875
Mas1	392	9.73166e-05	9.81456e-05	0.000531856	0.000542374
Tma7	537	8.87171e-05	8.94312e-05	9.44463e-05	0.000541901
Acsl5	1166	0.000120833	0.000121371	0.000101383	0.000540067
Gabarapl2	1278	0.000128244	0.000129611	0.000255446	0.000539974
Rpl15	1001	0.000114184	0.000115048	0.000144001	0.000538724
Ndufa8	1092	0.000117505	0.000117928	8.47916e-05	0.000531436
Lsm4	1229	0.000121698	0.000122487	0.000219279	0.000528707
Pnp	1026	0.000111275	0.000111779	6.21221e-05	0.000528599
Reep5	645	0.000108324	0.000109325	0.000281381	0.000528189
Cox4i1	1422	0.000138352	0.000139759	0.000297243	0.000528138
Tspan13	849	0.000113623	0.000114584	0.000181091	0.00052297
Plgrkt	939	0.000110894	0.000111318	6.35123e-05	0.000522373
Tm2d1	657	0.00010469	0.000105201	0.000102783	0.000522019
Hcfc1r1	615	8.44309e-05	8.47864e-05	4.25627e-05	0.000521877
Gm7429	1065	0.000113944	0.000114889	0.000337643	0.000521743
Bex1	1285	0.000127093	0.000128138	0.000263104	0.000520414
Lsm6	650	8.60202e-05	8.5934e-05	4.09873e-05	0.000520274
Vti1b	1183	0.000117903	0.000119006	0.000146379	0.000518863
Hopx	623	0.000107184	0.000107621	7.65486e-05	0.000515907
Rpl27	1124	0.000115966	0.000117093	0.000254783	0.000515475
Cnpy2	356	0.000107397	0.000108269	0.000284797	0.000515054
Mrpl52	1387	0.000135026	0.000136209	0.000199391	0.00051477
Atp5j	1268	0.000121977	0.000123046	0.00023852	0.000513531
Atp5g3	1359	0.000127905	0.000129116	0.000203793	0.000512092
Rps15a-ps5	906	0.000108716	0.000109813	0.000408798	0.000506755
Gm4997	622	0.000101586	0.000102342	0.000243075	0.000505013
Ap3s1	649	9.72845e-05	9.79607e-05	7.67061e-05	0.000504684
Rps16	851	0.000101914	0.000102977	0.00032353	0.000503714
Tmem147	1162	0.000113967	0.000114969	0.000152973	0.000503152
Cox5a	1026	0.000107143	0.000108004	9.50006e-05	0.000498735
Ndufs3	1027	0.000109809	0.000110759	0.000103489	0.000495946
Prkcsh	907	0.000113974	0.000114799	0.000140551	0.000494375
0610012G03Rik	1360	0.000127533	0.000128449	0.000137354	0.000494252
Naxd	941	0.000112416	0.000113433	0.00012543	0.000493268
Gm15772	948	0.000106247	0.000107182	0.000451763	0.000492679
Rps24	738	8.99814e-05	9.04196e-05	8.18027e-05	0.000491658
Bsg	651	0.000107953	0.00010888	0.000263448	0.000491349
Tagln2	1567	0.000141395	0.000142809	0.000366153	0.000489958
Dap3	1258	0.0001234	0.000124055	0.000150245	0.000489319
Rpl30	1162	0.000116499	0.000117644	0.000459957	0.000489249
Rpl22l1	265	9.02895e-05	9.03888e-05	6.07448e-05	0.000488698
Gm8580	867	0.00010126	0.000101551	6.12934e-05	0.000488043
3110040N11Rik	810	9.1541e-05	9.15561e-05	5.35251e-05	0.00048667
Ddrgk1	1407	0.000134382	0.000135351	0.000152606	0.000486291
Ergic1	546	9.75397e-05	9.82997e-05	0.000146669	0.000484005
Rpl32	740	9.00554e-05	9.08295e-05	0.000168233	0.000483845
Rps26	850	9.77888e-05	9.86326e-05	0.000276015	0.000483009
Cgref1	407	0.000108332	0.000108882	0.000114948	0.000482988
Rpl34-ps1	765	9.55954e-05	9.63532e-05	0.00026215	0.000481352
Anapc13	513	8.20478e-05	8.25113e-05	6.96266e-05	0.000481334
Smyd4	372	9.36524e-05	9.38231e-05	4.5148e-05	0.000481304
B230118H07Rik	1148	0.000115127	0.000115707	8.10401e-05	0.000481293
Tusc3	624	0.000108901	0.000109622	0.000215017	0.000480879
Rps14	744	9.2152e-05	9.29031e-05	8.22168e-05	0.000480467
Tmed10	744	0.000108674	0.00010954	0.00027287	0.000478385
Arxes2	434	0.000102305	0.000102922	0.000109469	0.000477814
Dnajc15	1173	0.000124791	0.000124992	8.5136e-05	0.000476898
Gm1673	1089	0.000113742	0.000114645	9.79875e-05	0.000476805
Tmem9b	781	9.99775e-05	9.98926e-05	4.66148e-05	0.000476583
Tmem160	314	0.000103974	0.000104835	0.000206644	0.000474888
Mlx	1287	0.000134526	0.000135071	0.000136943	0.000474121
Plp2	556	8.9338e-05	8.92698e-05	4.79479e-05	0.000473028
Mrps16	1267	0.000120956	0.000121612	0.00015193	0.000471629
Gm6525	903	0.000101113	0.000101867	0.000207191	0.000470937
Fabp5	678	0.000107657	0.000107845	8.86528e-05	0.00046999
Elof1	1296	0.000125827	0.000126605	0.000113887	0.000469653
Dap	1121	0.000114966	0.000116189	0.00016224	0.000468856
Prdx2	1322	0.000127227	0.000128118	0.000105716	0.00046851
Rps18	899	0.000103053	0.000103818	0.000370595	0.00046849
Bcap31	1184	0.000116114	0.000117073	0.000180194	0.000467421
Mrps21	987	9.76224e-05	9.80601e-05	9.40201e-05	0.000467364
Gng2	822	9.19967e-05	9.19885e-05	3.24664e-05	0.000466048
Bola2	1452	0.000132843	0.000134268	0.000294769	0.000465887
Rps17	597	9.08073e-05	9.1627e-05	0.000223329	0.000465583
Rps8	1393	0.000135605	0.000136853	0.000433605	0.00046531
Rpl11	1255	0.000127447	0.000128683	0.00036435	0.000464148
Hsbp1l1	442	7.95237e-05	7.96125e-05	2.80128e-05	0.000463038
Nt5c	547	8.41013e-05	8.39116e-05	2.9092e-05	0.000462874
Zcrb1	1337	0.000126199	0.000127259	0.000184164	0.000461949
Mrpl23	1441	0.000128119	0.000129203	0.000231833	0.000461936
Rps7	896	0.00010738	0.000108278	0.000364633	0.000461324
Rpl14	1328	0.000126604	0.000127922	0.000542192	0.00046035
Gm7285	609	0.000100496	0.000101179	0.000198603	0.000459523
Rps20	694	0.000104139	0.000104819	0.000258661	0.000459416
Naxe	635	0.000104567	0.000105114	0.00013319	0.000459412
Dctn3	1178	0.000122523	0.00012279	9.80483e-05	0.000459268
Commd2	1166	0.000110732	0.000111123	6.60009e-05	0.00045778
Atraid	579	9.14264e-05	9.19154e-05	8.21829e-05	0.000457442
Hexa	1672	0.000147275	0.000148766	0.000409636	0.000456177
Gm8942	522	7.86332e-05	7.89722e-05	5.54923e-05	0.000454978
Gm8623	779	9.6227e-05	9.70916e-05	0.000301795	0.000454398
Ssu72	1133	0.000111188	0.000111552	5.94988e-05	0.000454035
Ndufb11	396	9.36903e-05	9.44594e-05	0.000116845	0.00045335
Romo1	780	8.86271e-05	8.87893e-05	6.68907e-05	0.000453221
Rplp2	1106	0.000118935	0.000120121	0.000399652	0.000452978
Gm12191	1106	0.00011074	0.000111721	0.000355812	0.00045297
Rpl14-ps1	1498	0.000136688	0.00013796	0.000439841	0.000452654
Gm13213	651	8.66955e-05	8.70354e-05	6.64524e-05	0.000451956
Ifnar2	774	0.000103161	0.000103799	8.32035e-05	0.000451726
Ndufv2	1231	0.000113893	0.000114608	0.000109599	0.000451516
Calm2	1506	0.000137531	0.000138399	0.000261622	0.000451214
Rpl23	1013	0.000110951	0.000111944	0.000397535	0.000450636
Rpl26	902	0.000101716	0.000102535	0.000401037	0.000449523
1110008P14Rik	258	9.31938e-05	9.33478e-05	5.63951e-05	0.000449029
Ift22	603	7.38793e-05	7.36935e-05	2.76709e-05	0.000448159
Tmem205	730	8.72947e-05	8.73758e-05	4.23571e-05	0.000446065
Rps15a-ps6	786	9.82504e-05	9.90289e-05	0.000368947	0.00044493
Nenf	461	0.000102787	0.000103236	0.000107648	0.000444735
Fhl2	755	0.000107972	0.000107941	7.06327e-05	0.000443965
Rps13	868	0.000103353	0.000104369	0.00034115	0.000443851
Agpat4	484	8.59455e-05	8.58274e-05	4.97385e-05	0.000443609
Mrpl34	989	0.000101983	0.000102333	6.15626e-05	0.00044323
Rpl10	930	0.000108721	0.000109691	0.000307534	0.000442535
Gm6654	693	8.73694e-05	8.80378e-05	0.000182479	0.000442308
Gm5621	941	0.00010889	0.000109895	0.000333991	0.000441638
Rps2	1433	0.000134043	0.0001353	0.000521099	0.0004411
Golt1b	1268	0.000119351	0.000120186	9.79105e-05	0.000441006
Gm6252	907	0.00010548	0.000106364	0.000365504	0.000439762
Gm15421	367	8.61521e-05	8.61158e-05	5.20188e-05	0.000438979
Rpl34	843	9.69482e-05	9.76859e-05	0.000365706	0.000437961
Srp9	268	7.35172e-05	7.39612e-05	7.99898e-05	0.000436626
Gm2573	698	9.0492e-05	9.05583e-05	4.27867e-05	0.000435787
Psenen	938	9.63916e-05	9.67478e-05	0.000142148	0.000435063
Elob	1256	0.000116389	0.000117139	0.000283531	0.00043474
Mrpl20	585	8.17278e-05	8.17334e-05	2.75059e-05	0.00043412
Btf3	1410	0.000125021	0.000126077	0.000335793	0.000434024
Rpl12	1187	0.00011529	0.000116393	0.000353635	0.000433701
Gm11517	721	9.64067e-05	9.67556e-05	8.31886e-05	0.000433616
Rsl1d1	985	0.000103817	0.000104011	5.2556e-05	0.000432679
Eef1g	1110	0.000117123	0.000118272	0.000199706	0.00043178
Exoc6	352	0.000107973	0.000108317	0.000141996	0.000431439
Gm9794	1069	0.000113084	0.000114089	0.000469289	0.000431363
Hras	1029	0.000109552	0.0001095	6.34095e-05	0.000431212
Dstn	1364	0.000128994	0.000129482	0.000156803	0.00043057
Rpl36al	970	0.000101894	0.000102563	7.08982e-05	0.00042966
Perp	865	0.000101034	0.000101614	6.90694e-05	0.000429018
Acer2	554	8.67299e-05	8.68885e-05	3.76526e-05	0.000428966
Rabac1	478	8.9984e-05	9.06232e-05	7.91009e-05	0.00042787
Ctsl	1471	0.000131007	0.000132046	0.000292972	0.000427744
Tmem126a	1297	0.000116654	0.000117471	0.000255823	0.000427671
Mcts1	861	8.8008e-05	8.82002e-05	4.18841e-05	0.000425401
Dph3	702	8.36716e-05	8.39378e-05	4.14405e-05	0.00042523
Ndufb4c	1505	0.000132494	0.000133453	0.000163984	0.00042459
Sem1	1457	0.000130052	0.000130978	0.00018901	0.000424153
Mrpl54	1378	0.000122447	0.000123273	0.00022944	0.000422372
Serpina1b	304	8.71496e-05	8.71331e-05	4.17196e-05	0.00042101
Wdr83os	739	9.05616e-05	9.05014e-05	4.20008e-05	0.000420559
Gm10653	1368	0.00012907	0.000130163	0.000440625	0.000420081
Ndufa3	533	7.31896e-05	7.33964e-05	3.91997e-05	0.000420062
Wdr89	1212	0.00012073	0.000121886	0.000501561	0.000419919
Olfm1	946	0.000120711	0.000121162	0.000127754	0.000419834
Rps13-ps4	911	0.00010511	0.00010604	0.000246743	0.000419674
Atp6v1f	1004	0.000103194	0.000103739	0.000111285	0.000418851
Atp10a	392	7.51598e-05	7.47645e-05	3.25628e-05	0.000417001
Pawr	1087	0.000106694	0.000107072	4.85521e-05	0.000415658
Txn2	1441	0.000125658	0.000126804	0.000254411	0.000415642
BC031181	945	9.99626e-05	0.000100589	5.47837e-05	0.000415398
Gm14586	584	8.5775e-05	8.6344e-05	0.000225852	0.000414009
Ndufab1	971	9.57119e-05	9.60519e-05	0.000124707	0.000413797
Naa20	1299	0.000119632	0.00012038	8.76793e-05	0.000413504
Srp14	1098	0.000105514	0.000106044	0.000111402	0.000413457
Lgmn	953	0.00010056	0.000101086	4.84471e-05	0.000413087
Morn2	324	8.38722e-05	8.41029e-05	4.50282e-05	0.000412314
Hyi	1121	0.000117443	0.000117502	8.39979e-05	0.000411222
Steap1	1233	0.000120796	0.000121698	0.000110434	0.000410906
Rpl23a	1258	0.000119771	0.000120853	0.000460465	0.000410275
Gch1	1317	0.000126026	0.000126537	0.000146794	0.000409963
Gm15501	1501	0.000136052	0.000137271	0.000551673	0.00040989
Psma3	1466	0.00012732	0.000128478	0.000242798	0.000409654
Epcam	1680	0.000145222	0.000146499	0.00033244	0.000409583
Nedd8	1251	0.000120644	0.00012149	0.000106536	0.000408949
Krt18	1547	0.000135875	0.000136898	0.000175059	0.000408589
Mrpl17	752	9.24327e-05	9.26283e-05	4.12522e-05	0.000408151
Ndufb4	1163	0.000107252	0.000107799	0.000160879	0.000406544
Akr1a1	1699	0.000145797	0.000146994	0.000326107	0.000406533
Trappc6b	1111	0.000108273	0.000108805	6.29881e-05	0.000405104
Prkar1a	281	0.00011249	0.000112766	0.000129794	0.000404509
Btf3l4	1157	0.00010974	0.000110489	0.000109761	0.000404112
Rps15a	871	0.000101064	0.00010193	0.000468966	0.000403764
Pafah1b3	1297	0.000117706	0.000118263	6.98359e-05	0.000402379
Timm17b	891	9.61572e-05	9.66124e-05	4.46188e-05	0.000402211
4930503E24Rik	433	6.09966e-05	6.07226e-05	1.9369e-05	0.000402141
Creb3	1473	0.000129519	0.000130644	0.000204124	0.000401703
Gnpnat1	1013	9.67148e-05	9.69337e-05	4.34789e-05	0.000401618
Pin4	943	9.15221e-05	9.17136e-05	4.24773e-05	0.000401454
Rps21	805	9.53847e-05	9.61578e-05	0.000167884	0.000401217
S100a3	272	8.24234e-05	8.24886e-05	4.34282e-05	0.000400383
Slc35b1	397	0.000102231	0.000102654	0.000109023	0.000400048
Crip1	1254	0.000121979	0.000122543	0.000128511	0.000399684
Sf3b5	1043	9.74701e-05	9.80107e-05	6.72808e-05	0.000399565
Pcbd1	1125	0.000112888	0.000113249	8.11593e-05	0.000398875
Scp2	1129	0.0001071	0.000107815	9.38434e-05	0.000397807
Vkorc1l1	859	9.61335e-05	9.65552e-05	5.17479e-05	0.00039685
Rpl17-ps8	1178	0.000114809	0.000115702	0.000532767	0.000396494
Mrpl11	613	7.87328e-05	7.83371e-05	2.81573e-05	0.00039636
Stard10	1611	0.000141359	0.000142358	0.000186232	0.00039621
Fuom	802	8.72065e-05	8.71923e-05	2.87074e-05	0.000396082
Rpl27a	1011	0.000109494	0.000110385	0.000426815	0.000395481
Fau	1487	0.000131939	0.000133014	0.000467337	0.00039545
Mdh2	1679	0.000144111	0.000145411	0.000291871	0.000395332
Nos1ap	1561	0.000136604	0.000137477	0.000221835	0.000395265
Brix1	769	8.47867e-05	8.4627e-05	3.03088e-05	0.000395082
Cnih4	829	8.39196e-05	8.40433e-05	3.55066e-05	0.000394847
Pla2g12a	531	9.38415e-05	9.4101e-05	0.00012723	0.000393421
Yif1a	997	9.99707e-05	0.000100557	6.1819e-05	0.000393306
Rps6	1379	0.000126602	0.000127717	0.000397754	0.000393145
Gm6109	757	8.76886e-05	8.82833e-05	0.000105431	0.000392357
Ndufa11	917	8.85797e-05	8.87157e-05	6.26954e-05	0.00039204
Lypd6b	502	6.74196e-05	6.71817e-05	3.19602e-05	0.000391925
Rps27	902	9.55999e-05	9.63308e-05	0.00022777	0.000391627
Chgb	1021	0.000109948	0.000110399	6.19057e-05	0.000391588
Ndufs5	1256	0.000111448	0.000112101	9.60507e-05	0.000391368
Gm31300	1427	0.00013246	0.000133628	0.00022848	0.000391073
Acta1	402	7.27973e-05	7.26448e-05	2.84491e-05	0.000390832
Mmgt2	636	9.40297e-05	9.43796e-05	5.90813e-05	0.000390593
Pet100	248	0.000128744	0.000129453	0.000112213	0.000390584
Leprotl1	1542	0.000131725	0.000132659	0.000326187	0.000390262
Ptrhd1	261	9.17491e-05	9.18638e-05	5.17075e-05	0.00038825
Gm10548	481	8.79614e-05	8.7844e-05	4.1473e-05	0.000388011
Ramp2	284	0.000123246	0.000123792	0.000116233	0.000387459
Mcub	438	7.14857e-05	7.11076e-05	2.41381e-05	0.000386985
Rasa2	753	8.26448e-05	8.24111e-05	3.48449e-05	0.000386955
Rps10	1191	0.00011479	0.00011549	0.000208714	0.000386764
Sfr1	1424	0.000128873	0.000129433	0.000108654	0.000386703
Lamtor4	973	9.23979e-05	9.26234e-05	8.18075e-05	0.000385778
Rab5if	835	8.63635e-05	8.6438e-05	3.53568e-05	0.000385249
Rgs4	369	8.90239e-05	8.87279e-05	4.59615e-05	0.000385236
Rpl37rt	819	9.51529e-05	9.5818e-05	0.00039659	0.000384909
Mrpl10	1033	0.000107045	0.000107266	4.75247e-05	0.000384667
Slc50a1	1098	0.000104245	0.000104793	6.57736e-05	0.00038354
Glrx3	1466	0.000132909	0.000133711	0.000116995	0.000382978
Vsig10	662	9.03449e-05	9.05141e-05	4.10865e-05	0.000382917
Mrps18a	1026	0.000100753	0.00010104	0.000114842	0.000382863
Rab11a	1427	0.000127722	0.000128547	0.000158524	0.000382233
Plaur	220	0.000140164	0.000141107	0.000174616	0.000381305
Gm8451	929	0.000100957	0.0001017	0.000340044	0.000381102
AI413582	822	8.76179e-05	8.78456e-05	8.1888e-05	0.000380758
Ctsb	1619	0.000142546	0.000143433	0.000252429	0.000380622
5730412P04Rik	346	9.00609e-05	9.03929e-05	6.16639e-05	0.000380238
H2-K1	1922	0.00015599	0.000157518	0.000631444	0.000379722
Rnf152	242	9.78481e-05	9.81712e-05	0.000152913	0.000379181
Tapbpl	1032	0.000112077	0.000112851	9.69327e-05	0.000378538
Dram2	1084	0.00010679	0.000106938	4.41279e-05	0.000378246
Rps29	300	7.46779e-05	7.51218e-05	9.5168e-05	0.000378018
Rpl31-ps12	715	9.36601e-05	9.42564e-05	0.000204275	0.000377676
Shc3	244	0.000109384	0.000109856	0.000197441	0.000377481
Rpl28	1113	0.00011508	0.000115905	0.000338506	0.000377465
Rpl37	784	9.30845e-05	9.36769e-05	0.000344634	0.000377198
Gm6402	585	8.99845e-05	9.06227e-05	0.000200196	0.000376174
D8Ertd738e	1245	0.00011301	0.000113494	8.94275e-05	0.000376019
Ctsz	1189	0.000121056	0.000121105	7.13726e-05	0.000375674
Eci2	858	9.85677e-05	9.88831e-05	5.04952e-05	0.000375059
Rpl17-ps10	1350	0.000123263	0.000124192	0.000611699	0.000374604
Rps15a-ps4	804	9.62494e-05	9.69729e-05	0.000412275	0.00037446
Tmem176a	648	9.95121e-05	0.000100087	0.000116311	0.000374136
Pfdn5	1334	0.000121705	0.000122766	0.00026862	0.000373008
Bola3	853	9.20342e-05	9.19912e-05	4.11866e-05	0.000373005
Taf10	1043	0.000103479	0.000103687	5.36087e-05	0.00037206
Nudt19	1244	0.000114922	0.000115238	6.82074e-05	0.000371896
Mllt11	1395	0.000123102	0.000123647	0.000100985	0.000371308
5033406O09Rik	982	9.88857e-05	9.9023e-05	6.32995e-05	0.000370607
Itm2b	1324	0.000128508	0.00012925	0.000126849	0.00037028
Gprc5a	329	9.68433e-05	9.68313e-05	0.000124091	0.000370136
Eif3e	1733	0.000150886	0.00015199	0.000269026	0.000369305
Smim22	945	9.63135e-05	9.65126e-05	3.99537e-05	0.000369143
Rpl24	1606	0.000137903	0.000138992	0.000596714	0.000369063
Polr2k	664	7.05448e-05	7.03962e-05	3.08446e-05	0.000367251
Dusp6	249	0.000126493	0.00012699	0.000117981	0.000366489
Ndfip1	1612	0.000137445	0.0001383	0.000163805	0.000365959
Ildr2	376	8.6258e-05	8.6296e-05	9.7643e-05	0.000365625
Fxyd5	229	0.000132105	0.000132896	0.000500714	0.000365359
Gm10045	1431	0.00012787	0.0001287	0.000549879	0.000365213
Stmn3	1047	0.000111307	0.000111837	9.3054e-05	0.000365107
Atp5h	1866	0.000150644	0.000152071	0.000316595	0.000365035
Nab2	216	9.33042e-05	9.33559e-05	0.000105654	0.000364745
Tmem50a	1461	0.000134433	0.000135105	0.000122804	0.000364162
Gng5-ps	1101	0.000100588	0.000101221	0.000546086	0.000363694
Rpl18	1153	0.000117008	0.000117942	0.00028059	0.00036315
Ropn1l	289	8.62798e-05	8.63109e-05	4.08334e-05	0.0003614
Mif	756	8.43299e-05	8.44384e-05	8.76709e-05	0.000361351
Rps3a1	1018	0.000111979	0.000112731	0.000273301	0.000361299
Pdcd5	1552	0.000132562	0.000133466	0.000141084	0.000360304
Atp5g2	1626	0.000143043	0.000144049	0.000181883	0.000360082
Lsr	1600	0.000138214	0.000139192	0.000167727	0.00035958
Ier3ip1	259	8.24644e-05	8.29985e-05	0.0001679	0.000359485
Pigx	1019	9.66996e-05	9.69645e-05	4.20494e-05	0.000359104
Sdc2	1649	0.000137595	0.00013859	0.000170989	0.000358611
Edem1	829	0.000103099	0.000103772	0.000109894	0.000358594
1110038B12Rik	737	8.29047e-05	8.24408e-05	2.47969e-05	0.000358469
H2-D1	1899	0.000152244	0.00015372	0.000578502	0.000358066
Acp1	1631	0.000135555	0.000136587	0.000279372	0.000357727
Mea1	1099	9.93018e-05	9.98409e-05	0.00019324	0.000357558
Mpc1	1235	0.000108917	0.000109623	0.000261364	0.000356913
Pdcd6	1001	0.000109942	0.000110279	9.84736e-05	0.000356818
Eif1	1576	0.000133495	0.000134336	0.000181982	0.00035608
Camk2n2	1510	0.00012984	0.000130497	0.000115405	0.000355967
Gm32899	1034	9.78459e-05	9.8258e-05	6.19429e-05	0.000355486
Bdh2	212	0.000116436	0.000116922	0.000444937	0.000354646
Rps27rt	922	9.63483e-05	9.70261e-05	0.00020383	0.000354576
Tbca	1360	0.000116319	0.000117116	0.00018849	0.000353617
Nudt5	1186	0.000116722	0.000117396	7.33587e-05	0.000352664
Gstm5	333	8.51398e-05	8.55301e-05	7.76808e-05	0.000352224
Orai1	946	9.34041e-05	9.31433e-05	3.39655e-05	0.000352186
Spc24	242	9.81173e-05	9.84213e-05	5.58603e-05	0.000351889
Apopt1	971	9.66911e-05	9.69266e-05	4.94716e-05	0.000351868
Emc4	1525	0.000126144	0.00012691	0.000132652	0.000351043
Arpc2	1012	0.00011748	0.000117575	0.000114803	0.000350918
Zfp593	1029	9.63751e-05	9.64818e-05	4.13477e-05	0.000350914
Gm10698	257	9.43407e-05	9.46487e-05	5.97739e-05	0.000350736
Pomp	1369	0.0001165	0.000117268	0.000198106	0.000350415
Sac3d1	599	6.51325e-05	6.47563e-05	2.04026e-05	0.000350166
Dad1	236	0.000107311	0.000107985	0.00020003	0.000349961
Hint1	1429	0.000125756	0.000126604	0.000140197	0.000349958
Brk1	1279	0.000113175	0.000113672	9.26634e-05	0.000349941
Gng5	1190	0.000106279	0.000106951	0.000592898	0.000349407
Bet1	458	7.16647e-05	7.14398e-05	2.52204e-05	0.00034926
Tmem167	730	7.49588e-05	7.50206e-05	4.47826e-05	0.000349159
Rpl17	1220	0.000114733	0.000115664	0.000600284	0.000348458
Ttll3	752	9.04546e-05	9.03464e-05	4.08338e-05	0.000348045
Idnk	739	7.6642e-05	7.66875e-05	4.85431e-05	0.000347904
Rpl36	1639	0.000134152	0.000135267	0.000285291	0.000347903
Cisd2	766	8.30067e-05	8.25411e-05	2.77157e-05	0.000347407
Pfdn1	1476	0.000122727	0.000123619	0.000191966	0.000347399
BC004004	1507	0.000125114	0.000125815	0.000160247	0.000346805
Ogfod3	1137	0.000109265	0.000109714	7.10246e-05	0.000346071
Pcbd2	1233	0.000108714	0.000109022	8.2325e-05	0.000345651
Atp5c1	1519	0.000125486	0.000126387	0.000275804	0.000344567
Ndn	1727	0.000140806	0.00014178	0.000188699	0.000343612
Kctd17	696	8.9807e-05	8.97477e-05	3.98167e-05	0.000343592
Gm9385	1584	0.000135796	0.000136804	0.000571387	0.000343373
Tmbim4	261	0.00010036	0.000101135	0.000371076	0.000343222
Cfl1	1667	0.000138662	0.000139658	0.000356156	0.000342726
1810037I17Rik	629	7.4188e-05	7.41456e-05	3.9322e-05	0.000342626
Psmd8	1586	0.000131715	0.000132601	0.000212456	0.000342027
Tspan7	561	8.86617e-05	8.87681e-05	6.5604e-05	0.000341911
Rps15	1467	0.000130324	0.000131258	0.000588503	0.000341028
Faap20	851	9.12471e-05	9.1235e-05	3.31754e-05	0.00034048
Uqcr10	1745	0.000140705	0.000141699	0.000253801	0.000340417
Akr1c12	845	9.65142e-05	9.62235e-05	4.70672e-05	0.000340326
Eif1ax	1615	0.000134305	0.000135056	0.000138998	0.000339917
Il3ra	782	0.000108708	0.000108774	8.1514e-05	0.000339789
Rpl6	996	0.00010671	0.000107483	0.00028516	0.000339419
Nat8f1	364	5.91104e-05	5.89878e-05	1.81062e-05	0.000338897
Zbed5	1760	0.000142847	0.000144029	0.000608297	0.000338354
Rala	527	6.61193e-05	6.58696e-05	3.06365e-05	0.000338346
Prdx5	985	0.000101763	0.000102117	5.44183e-05	0.000338104
Atp6v0b	1653	0.000135665	0.000136758	0.000480895	0.000337546
Rpl36a	1036	0.000101677	0.000102154	0.000138185	0.000336892
Cntnap5b	271	6.67441e-05	6.65003e-05	3.3533e-05	0.000336451
Cox7b	1193	0.000103998	0.000104508	0.000141485	0.000336361
Pno1	1187	0.00010745	0.000107668	6.21107e-05	0.000335952
Mpg	566	7.40865e-05	7.3909e-05	2.26634e-05	0.000335752
Kctd12	808	0.000102685	0.00010254	6.83096e-05	0.000335717
Rpl31	903	0.000100402	0.000101014	0.000289309	0.000335473
Atp5o	1456	0.00012299	0.00012372	0.000109098	0.000335283
Arg1	537	9.27882e-05	9.27659e-05	4.95804e-05	0.000335048
Mrpl42	1279	0.00011047	0.000110906	9.60801e-05	0.00033482
Gtf2a2	504	6.1785e-05	6.12835e-05	1.73463e-05	0.000334814
H2-T23	1265	0.0001207	0.000120883	6.9946e-05	0.000333788
Mrpl30	1500	0.000123894	0.000124721	0.000140274	0.000333434
Smyd5	481	6.03994e-05	6.01789e-05	1.93887e-05	0.000333259
Nrip3	550	8.40538e-05	8.40021e-05	6.02845e-05	0.000333144
Zcchc9	1538	0.00013241	0.000132917	8.84432e-05	0.00033288
Wsb2	1627	0.000140251	0.000140935	0.000166446	0.000332628
Edf1	2032	0.000158605	0.000160099	0.000346423	0.000331988
Fkbp2	309	0.000101975	0.000102556	0.000264257	0.000331053
Mrps35	926	9.16404e-05	9.17655e-05	3.35343e-05	0.000330936
Ap2s1	1391	0.000122159	0.000122771	0.000163053	0.000330834
Cd47	1611	0.000138276	0.000139175	0.000200689	0.00032953
Pigp	1152	0.000101599	0.000101849	8.13461e-05	0.000329339
Rpl35a	841	9.65022e-05	9.70677e-05	0.000257783	0.000328596
Polr3d	1359	0.000119548	0.00011992	7.24223e-05	0.000328346
Llph	1425	0.000118749	0.000119348	0.000141362	0.000328073
Rps5	1513	0.000129511	0.00013032	0.000361441	0.000327144
Rpl10a	1661	0.0001429	0.00014359	0.000160562	0.000326586
Gm10051	1009	0.000105678	0.000106359	0.000260539	0.000326485
Omd	322	5.27604e-05	5.2471e-05	2.51419e-05	0.000326447
3110082I17Rik	391	5.8239e-05	5.80673e-05	1.79224e-05	0.000326437
Cgrrf1	597	7.9607e-05	7.93341e-05	2.71767e-05	0.000325913
Grm7	782	7.6575e-05	7.64784e-05	3.67926e-05	0.000325784
Hikeshi	432	7.37033e-05	7.35408e-05	2.77921e-05	0.000325145
Fbxl15	643	9.92706e-05	9.91466e-05	6.32671e-05	0.000324039
Ptcra	1116	0.000103066	0.000103192	5.87013e-05	0.000322889
Snrpe	1615	0.000130841	0.000131704	0.000157146	0.000322691
Gm10362	1100	0.000108136	0.000108904	0.000271077	0.000322438
Commd6	1550	0.000129978	0.000130566	9.66754e-05	0.000321445
Rabl2	311	5.93693e-05	5.8978e-05	2.1795e-05	0.000321443
Mrps18b	1589	0.000130941	0.000131517	0.000119051	0.000321205
Fuca1	1024	0.000105704	0.000105855	6.20149e-05	0.000319149
Malsu1	313	5.78698e-05	5.77195e-05	1.99643e-05	0.00031823
Mpv17l	1220	0.000127792	0.000128154	0.000107484	0.000318192
Mrps11	1524	0.000124689	0.000125211	9.95725e-05	0.000317949
Gm5879	2030	0.000160789	0.00016221	0.000645751	0.00031738
Slc25a4	1948	0.000158701	0.000159804	0.000312535	0.000316766
Naca	1936	0.000150822	0.000152049	0.000345178	0.000315212
Rps11	1694	0.000139147	0.000140184	0.000302687	0.000315135
Gnas	338	8.92708e-05	8.93095e-05	6.86157e-05	0.000314552
Il10rb	1504	0.000125066	0.000125636	0.000173557	0.00031411
Txndc12	1583	0.000130636	0.000131206	0.000139365	0.00031311
Slc30a4	1245	0.000111052	0.000111091	6.2909e-05	0.00031297
Senp7	524	7.47643e-05	7.45624e-05	3.13657e-05	0.000312285
Cmas	950	9.88492e-05	9.92751e-05	5.66647e-05	0.000312165
Enpp1	513	6.86542e-05	6.84653e-05	2.09727e-05	0.00031153
Gm12618	1564	0.000134508	0.000135251	0.000230211	0.000311294
Maff	708	8.44376e-05	8.45615e-05	6.73242e-05	0.000310915
Tmem120a	821	8.20968e-05	8.20764e-05	4.57626e-05	0.000310804
Mpp2	1258	0.00011438	0.000114452	6.87684e-05	0.000310695
Tram1l1	438	6.77702e-05	6.7397e-05	2.96352e-05	0.000310646
Snrpg	808	8.82238e-05	8.82257e-05	3.98239e-05	0.000310622
Gla	1240	0.000108307	0.000108591	6.10437e-05	0.000310602
Ran	1188	0.000108073	0.000108586	0.000161573	0.000310356
Syt5	1536	0.00013087	0.000131464	0.000124289	0.000308972
Gsto1	1321	0.000117766	0.000118359	0.000102892	0.000308683
Stoml2	1232	0.000107117	0.000107319	5.59712e-05	0.000307481
Mcee	630	7.93612e-05	7.95027e-05	3.2112e-05	0.000306405
Gnptg	313	9.73977e-05	9.77417e-05	0.000196744	0.000306171
Lypd1	1464	0.000122871	0.000123258	9.11564e-05	0.000306086
Gm5523	2022	0.000155555	0.000156898	0.000422988	0.00030582
Suv39h2	313	5.33875e-05	5.29885e-05	2.21319e-05	0.0003057
Park7	1621	0.000130474	0.000131012	0.000116867	0.00030499
Gmds	269	8.53382e-05	8.56428e-05	9.9431e-05	0.000304718
Amz2	1611	0.000141495	0.000142115	0.000136568	0.000304682
Rpn2	417	0.00010919	0.000109349	9.97694e-05	0.000304555
Anapc16	804	8.10595e-05	8.11195e-05	5.45744e-05	0.000304244
Gde1	1780	0.000142713	0.000143634	0.000158295	0.00030411
Lipo3	320	6.72243e-05	6.7093e-05	2.74286e-05	0.000304054
Zswim7	664	7.27001e-05	7.22191e-05	2.11587e-05	0.000303977
Rpl13a	1362	0.000125149	0.000125941	0.000368564	0.000303775
H2-K2	1984	0.000156986	0.000158297	0.000432458	0.000302201
Eef1b2	530	8.35553e-05	8.38968e-05	8.78184e-05	0.000301876
Rap1a	862	8.85839e-05	8.85321e-05	3.28418e-05	0.000301505
Inpp5f	464	8.92652e-05	8.9117e-05	5.18562e-05	0.000300851
Sp3os	220	9.15808e-05	9.15961e-05	4.63411e-05	0.000300845
Cd151	1821	0.000149551	0.000150497	0.000199181	0.0003007
Atp6v0c-ps2	1939	0.000150346	0.000151514	0.000558509	0.000300258
Spcs1	127	7.27626e-05	7.3009e-05	5.89977e-05	0.000299798
Smim8	1386	0.000117436	0.000117521	5.54332e-05	0.000299789
S100a13	1183	0.000108037	0.000108307	0.000101622	0.000299601
Ndufa6	1599	0.000138321	0.000139015	0.000187804	0.00029933
Timm8b	915	8.4214e-05	8.42917e-05	5.19368e-05	0.000298846
Cib1	1818	0.00014322	0.000143914	0.000126306	0.000297407
Oxct1	1297	0.000112933	0.000112914	5.9266e-05	0.000297223
Myl12b	1370	0.000116109	0.000116464	7.64623e-05	0.000297195
H2-Q1	1085	0.000111317	0.000111456	6.41986e-05	0.000297165
Rpl13	1514	0.000134051	0.000134962	0.000654568	0.000297077
Aff2	192	7.85256e-05	7.85419e-05	6.16224e-05	0.000296668
Bex3	1951	0.000150597	0.000151799	0.000314874	0.000296505
Emd	1848	0.000143242	0.000144234	0.000254802	0.000296497
Rtraf	959	9.94946e-05	9.97026e-05	5.84019e-05	0.000295968
Atp6v0c	1867	0.000145602	0.000146754	0.000589346	0.000295826
Gm12853	282	5.63563e-05	5.59501e-05	1.87595e-05	0.000295228
Hist1h2br	437	7.48595e-05	7.48654e-05	3.71314e-05	0.000294463
Yipf6	1040	0.000108309	0.000108646	6.98116e-05	0.00029439
Stc2	400	6.29666e-05	6.28724e-05	5.49491e-05	0.000294232
Gm12070	2035	0.000157378	0.000158606	0.000641063	0.000294026
Hgfac	664	8.55901e-05	8.57481e-05	4.4284e-05	0.000293922
Immp1l	1046	9.50607e-05	9.50571e-05	4.31324e-05	0.000293775
Chchd2	1595	0.000128502	0.000129475	0.000455251	0.000293556
Ddost	1462	0.00012807	0.000128688	0.000127785	0.000293359
Coa3	1727	0.000134781	0.00013554	0.000193226	0.000293093
Pcgf1	1141	9.84882e-05	9.85744e-05	4.73744e-05	0.000291641
Vkorc1	219	8.36313e-05	8.42894e-05	0.000273979	0.000291382
Rcn1	823	9.81568e-05	9.81427e-05	4.24101e-05	0.000291232
Rpl21	1405	0.000123483	0.000124288	0.000614333	0.000290914
S100a1	1220	0.000107618	0.000108062	0.000123223	0.000290864
Ap1s1	1598	0.000130358	0.000130752	8.73688e-05	0.000290606
Ndufs7	1487	0.000120844	0.000121427	0.000137487	0.000289238
Sdhb	1450	0.000123042	0.00012327	8.57518e-05	0.000287397
Lrpprc	1579	0.000134441	0.00013484	0.00010335	0.000287067
Rpl13-ps6	1474	0.000131516	0.000132395	0.00057929	0.000285766
Ubald1	800	9.09379e-05	9.06106e-05	3.76677e-05	0.000285745
Rnf130	1731	0.000145727	0.000146377	0.000207118	0.000285394
B9d2	1438	0.000120949	0.000120997	6.05949e-05	0.000284624
Ndufa5	760	7.64844e-05	7.65191e-05	4.70592e-05	0.000284622
Rplp1	552	6.72331e-05	6.73335e-05	2.87946e-05	0.000283368
Ephx4	1303	0.000112757	0.000112808	6.78933e-05	0.00028327
Gm26777	213	6.68689e-05	6.64196e-05	2.80849e-05	0.000282879
Rps9	1553	0.000136522	0.000137362	0.000239613	0.00028228
Rpl3	2044	0.000160449	0.000161767	0.000587364	0.000281262
Micu1	1650	0.000137254	0.00013772	0.000110506	0.000281214
Rpl5	1507	0.000133042	0.000133891	0.000409776	0.000281172
Timm23	1181	0.000100565	0.000100787	7.41921e-05	0.000280966
Ell2	681	9.36664e-05	9.37732e-05	5.35546e-05	0.000280831
Eloc	651	6.76453e-05	6.72334e-05	2.01699e-05	0.000280723
Hecw2	197	0.000101893	0.000101987	6.37601e-05	0.000280677
Gm11478	1321	0.00011993	0.000120698	0.000497098	0.000280384
Eif4e3	1030	0.000112048	0.000111941	6.70441e-05	0.000280226
Ecd	979	0.000101561	0.000101979	6.41702e-05	0.000279861
C130074G19Rik	202	5.86134e-05	5.83232e-05	2.3482e-05	0.000279605
Pih1d2	482	6.37509e-05	6.3241e-05	2.23085e-05	0.00027958
Nbdy	166	9.30001e-05	9.28749e-05	5.30809e-05	0.000279401
Psmb6	814	7.78296e-05	7.78714e-05	6.33123e-05	0.000278917
Gba	1915	0.000148423	0.000149324	0.000261533	0.000278058
Sdhaf4	967	8.86686e-05	8.8543e-05	3.31386e-05	0.00027765
Surf4	1836	0.000148972	0.000150044	0.000295179	0.000277589
Map2k3	807	8.44495e-05	8.40517e-05	3.5543e-05	0.000277208
Yipf1	530	7.21187e-05	7.18763e-05	3.05363e-05	0.000277196
Atp5c1-ps	1063	9.29e-05	9.29079e-05	4.82433e-05	0.00027719
Lrpap1	1722	0.000147458	0.000148282	0.000201964	0.000276911
Tor3a	1048	0.000108068	0.000108023	7.78272e-05	0.000276823
Smpd1	1841	0.000148785	0.000149823	0.000344948	0.000276481
Ikbip	844	9.11804e-05	9.14756e-05	4.6643e-05	0.000276173
Vamp8	1611	0.00012715	0.000127785	0.00014645	0.00027557
Nmrk1	1709	0.000136224	0.000136824	0.000100622	0.000275222
Il13ra1	365	7.92336e-05	7.91801e-05	4.88191e-05	0.000275181
Eif3h	2056	0.000159998	0.000161275	0.000392655	0.000275096
Ube2k	1558	0.000124308	0.000125119	0.000222285	0.000274585
Plk2	236	7.62171e-05	7.62044e-05	5.21205e-05	0.000274476
Gm4786	1596	0.000136513	0.000137369	0.000409892	0.000274375
P4htm	930	9.76084e-05	9.7562e-05	5.603e-05	0.000274265
Eif3k	1988	0.000151464	0.000152452	0.000194334	0.000274226
Ift20	603	6.75346e-05	6.74114e-05	2.38219e-05	0.000274129
Rbx1	1047	9.22199e-05	9.25881e-05	0.000147682	0.00027403
Cd82	1341	0.000115955	0.00011651	0.000148663	0.000274026
Rab3ip	1148	0.000103729	0.000103898	4.47569e-05	0.000272803
Selenof	1280	0.000112646	0.000113059	8.33373e-05	0.000272504
Nsa2	1688	0.000144041	0.000144616	0.000180268	0.000272222
Isca2	692	6.86772e-05	6.84035e-05	2.11151e-05	0.000272047
Spint2	1647	0.000138726	0.000139622	0.000255394	0.000271839
Adprh	1655	0.000129689	0.000130368	0.000153367	0.000271808
Tmx1	1609	0.000134387	0.000135047	0.000136645	0.000271726
Rack1	1161	0.000113788	0.000114425	0.000224584	0.000271725
Rpl19	1714	0.000142306	0.000143328	0.000390152	0.000271639
Cox19	507	6.73484e-05	6.68942e-05	2.51923e-05	0.000271153
Aimp1	1702	0.00013792	0.000138503	0.000101934	0.000270772
Ybx3	1365	0.000112834	0.000113146	7.44748e-05	0.000270433
Cd274	219	5.72963e-05	5.72288e-05	4.09663e-05	0.000269459
Zc3h15	1824	0.000142951	0.00014381	0.00015491	0.00026891
Mlf2	1604	0.000130182	0.000130565	9.10668e-05	0.000268635
Mrpl1	1361	0.000111372	0.000111675	8.32162e-05	0.000268413
Mmadhc	1220	0.00010848	0.00010871	6.17044e-05	0.000267801
Tc2n	396	6.19447e-05	6.15581e-05	3.56409e-05	0.000267651
Atp6v0e2	1619	0.000132811	0.00013349	0.000139631	0.000267414
Guk1	1219	0.000101704	0.000102111	9.98234e-05	0.00026729
Rps12	331	6.4511e-05	6.45997e-05	3.35727e-05	0.000266908
Tmem251	1615	0.000128266	0.000128843	0.000147207	0.000266902
Hpgds	1078	9.51184e-05	9.55256e-05	0.000127095	0.000266705
Ly96	264	5.27988e-05	5.25962e-05	3.89406e-05	0.00026652
Wwp1	930	8.85015e-05	8.80618e-05	3.07607e-05	0.000266383
Ppp1r35	1158	0.000101712	0.000101562	3.83425e-05	0.000266365
Lmf1	1220	0.000114477	0.000114825	6.81444e-05	0.000265185
Txndc17	1257	0.000104819	0.000105376	0.000165825	0.000264905
1600029O15Rik	1609	0.000129079	0.00012948	0.000116626	0.000264634
Slc35a2	689	7.54776e-05	7.48682e-05	2.41253e-05	0.000264113
Eef1e1	1849	0.000143787	0.000144424	0.000117619	0.000264032
Eed	1462	0.000121773	0.000121942	6.9725e-05	0.00026365
Tbl2	953	9.5004e-05	9.48797e-05	3.65601e-05	0.000262947
Fkbp11	149	9.29886e-05	9.31027e-05	7.3856e-05	0.000262563
Hax1	1073	9.68727e-05	9.69031e-05	5.92182e-05	0.000262297
Scand1	1937	0.000150396	0.000151236	0.00020995	0.000262241
Jagn1	1424	0.000118698	0.000118978	6.75752e-05	0.000261887
Cyp4f16	738	7.49017e-05	7.49089e-05	4.88702e-05	0.000261599
Mrps36	1883	0.000143756	0.000144594	0.000205779	0.000261594
Thoc7	1494	0.000120993	0.000121318	9.04174e-05	0.000260963
Serhl	1160	0.000100118	9.99125e-05	3.77287e-05	0.000260536
1110018N20Rik	1478	0.000119359	0.000119532	6.01808e-05	0.000260214
Llph-ps2	1654	0.000131086	0.000131599	0.000114792	0.000259496
Zswim4	575	6.39607e-05	6.36618e-05	2.56855e-05	0.000258559
Taf9	1206	0.000104045	0.000103954	4.70557e-05	0.000258453
Igsf5	332	9.4483e-05	9.43032e-05	7.01631e-05	0.000258436
Gusb	1748	0.00013603	0.000136586	0.00011761	0.000258418
Sap18b	1469	0.000120853	0.000121406	0.000121168	0.0002582
Comtd1	1247	0.000105312	0.000105263	5.24231e-05	0.000258188
Gm20498	135	5.78037e-05	5.78871e-05	3.44554e-05	0.000258044
Clpb	1295	0.000117626	0.000118248	0.000358718	0.00025786
Gnl3	1130	9.78392e-05	9.77592e-05	4.15818e-05	0.000257732
Emc6	1678	0.000131483	0.000131949	8.57952e-05	0.000257407
Calm1	1869	0.000148118	0.000148962	0.000171772	0.000257383
Fundc2	1193	9.92311e-05	9.93444e-05	6.11395e-05	0.000257357
Mapk12	425	5.12748e-05	5.09298e-05	1.96058e-05	0.000256548
Pdcd10	1277	0.000111336	0.000111349	5.8749e-05	0.000256236
Bscl2	1763	0.000140641	0.000141383	0.000195966	0.000256211
Glrx2	1328	0.00010971	0.000109692	4.49108e-05	0.000256211
Chchd3	1828	0.000141591	0.000142325	0.000146019	0.00025598
Micall1	877	8.61421e-05	8.61204e-05	4.98653e-05	0.000254524
Mindy3	889	8.81419e-05	8.78517e-05	3.06917e-05	0.000253953
Snx3	1576	0.000124013	0.000124692	0.00015152	0.000253917
Ttyh1	170	0.000139823	0.000140416	0.000116381	0.000253866
Psmb5	1438	0.000120971	0.000121245	0.000101181	0.000252985
Mapk11	232	6.04617e-05	6.02938e-05	3.87162e-05	0.00025238
Npepl1	1277	0.000122582	0.000122616	9.35472e-05	0.000252199
Gapdh	2110	0.000157577	0.000158912	0.000900475	0.000251605
Fdx1	1654	0.000129892	0.000130257	0.000101419	0.000251463
Nabp2	1214	0.000102393	0.000102471	4.59238e-05	0.000251248
Stx12	1873	0.00014457	0.000145351	0.000195071	0.000251204
Ostc	706	7.47143e-05	7.46408e-05	2.8886e-05	0.000249851
Ctsa	2082	0.000155534	0.000156662	0.000314268	0.00024979
Dpm3	190	8.50538e-05	8.58633e-05	0.00041746	0.000249396
Fis1	2321	0.000169964	0.000171422	0.000555547	0.000248687
Rpl7	1542	0.000131755	0.000132551	0.000545773	0.000248598
Rab11fip4	1145	0.000102589	0.000102488	5.40127e-05	0.000248515
Plagl1	948	8.81476e-05	8.77047e-05	3.1243e-05	0.000248343
Ube2l3	1678	0.000132503	0.000133296	0.000274564	0.000247963
Rpl22	1728	0.000136869	0.000137483	0.000151616	0.000247833
Fam3c	1029	0.000106089	0.000105837	6.17156e-05	0.000247476
Rpl7a	1516	0.000129634	0.000130437	0.000541718	0.000247102
B2m	1360	0.000110419	0.000110708	7.53295e-05	0.000247081
Tcp1	1822	0.000143729	0.000144325	0.000124858	0.000246908
Gm12174	1650	0.000136586	0.000137411	0.00054317	0.000246782
Eif3i	1424	0.000121727	0.000122081	8.68757e-05	0.000246577
Hist1h2bp	2067	0.000153631	0.000154519	0.000179025	0.00024649
Mrpl58	1331	0.000112922	0.000113174	9.16432e-05	0.00024617
Eef1akmt4	1323	0.000112062	0.000112381	6.48299e-05	0.000246076
Trmt112	1951	0.000146415	0.000147093	0.00014239	0.000245969
Mustn1	172	7.53838e-05	7.51408e-05	3.82753e-05	0.000244418
Vbp1	1604	0.000130061	0.000130296	8.35825e-05	0.000244356
Ccdc157	1032	9.10873e-05	9.07602e-05	2.98303e-05	0.000244317
Psmb1	1865	0.000140987	0.000141891	0.000223419	0.000243728
Sh3glb1	1856	0.000142182	0.000143015	0.000256725	0.000243472
Ndufb2	1038	8.94494e-05	8.96063e-05	6.17672e-05	0.000243162
Tmem248	1695	0.000132839	0.000133395	0.000129345	0.000243141
Cidea	632	6.43477e-05	6.41839e-05	3.05018e-05	0.000242783
Gm36757	120	3.24753e-05	3.22519e-05	1.48286e-05	0.000242684
Psmb10	317	5.57036e-05	5.53258e-05	2.15791e-05	0.000242656
Sub1	1775	0.00013743	0.000138022	0.000159972	0.000242116
Myl12a	1645	0.000129178	0.000129679	0.000139372	0.00024189
Sod1	1542	0.000121557	0.000121978	0.000113469	0.000241415
Tsta3	1253	0.000102033	0.00010196	4.28133e-05	0.000241248
Krt27	178	4.67271e-05	4.64539e-05	2.566e-05	0.000240869
Ergic2	1895	0.000151513	0.000152153	0.000185863	0.000240731
Cep41	151	4.12342e-05	4.08644e-05	1.49232e-05	0.000240693
Mcu	227	5.46053e-05	5.4351e-05	2.25626e-05	0.000240047
Mrpl12	459	5.521e-05	5.49263e-05	2.4357e-05	0.000239639
Rab34	994	9.55414e-05	9.5447e-05	4.08669e-05	0.00023802
Bdnf	312	6.9681e-05	6.95254e-05	3.91988e-05	0.00023777
Dnajc21	1925	0.000146391	0.000146961	0.000141798	0.000237626
Lamp2	1795	0.000138251	0.000139143	0.000294011	0.000237578
Atp5d	2052	0.000159107	0.000160043	0.00030174	0.000237253
Emb	1861	0.000144309	0.000144988	0.000169613	0.000236714
Tbrg1	2282	0.000167625	0.000168835	0.000350101	0.000236707
Gm13215	1148	0.000108803	0.000109301	0.000165331	0.000236444
Ube2n	1004	9.16551e-05	9.14821e-05	3.87358e-05	0.000235933
N6amt1	1756	0.000137953	0.000138436	0.000116983	0.000235644
St3gal6	112	7.74894e-05	7.78569e-05	8.89959e-05	0.000235641
Vdac2	1560	0.000120848	0.00012151	0.000160745	0.000235292
Lepr	117	5.33576e-05	5.32536e-05	4.0264e-05	0.000234475
St3gal3	308	6.04336e-05	6.00249e-05	2.47221e-05	0.000234389
Slc25a5	1474	0.00011991	0.000120297	0.000173639	0.000234358
Fam173a	1745	0.000135575	0.000136163	0.000167279	0.000234325
Dusp19	1105	9.39776e-05	9.39715e-05	4.7667e-05	0.000234246
Mrps14	1086	9.34676e-05	9.36079e-05	8.55306e-05	0.000234222
Fam177a	707	8.9627e-05	8.95552e-05	4.94023e-05	0.000234204
Bri3bp	728	8.05465e-05	8.03285e-05	3.15501e-05	0.000233497
Pgls	1862	0.000143896	0.000144504	0.000166186	0.000233442
Pcdhac1	895	8.41292e-05	8.36365e-05	2.71006e-05	0.000233296
Rheb	1834	0.000143798	0.000144394	0.000127361	0.000233265
Clic1	2114	0.000161075	0.000162053	0.000256071	0.000233056
Nhp2	1530	0.000120136	0.000120525	0.000109649	0.0002328
1110004F10Rik	1272	0.000114326	0.000114381	7.28797e-05	0.000232782
2210016L21Rik	2059	0.000153596	0.000154473	0.000177649	0.000232777
Serpinb1a	155	0.000125327	0.000125694	8.76163e-05	0.000232335
Arpp19	1432	0.000115032	0.000115634	0.000180295	0.000232229
Arpc5l	1653	0.000136687	0.000137059	0.000109247	0.000232091
Ppa2	1524	0.000124489	0.000124664	7.90324e-05	0.000231883
Itfg1	1361	0.000118804	0.000119098	9.87882e-05	0.000231812
Ier2	172	5.85326e-05	5.82704e-05	2.54437e-05	0.000231739
Eif3l	1479	0.000122115	0.000122451	8.62874e-05	0.000231507
Tfb2m	568	7.94245e-05	7.91207e-05	4.64642e-05	0.000230475
Diaph3	546	5.73132e-05	5.67709e-05	1.92009e-05	0.000230389
Gm12669	1309	0.000118156	0.000118335	7.89673e-05	0.000229974
Cyc1	1462	0.00012114	0.000121443	7.96591e-05	0.000229865
Exosc1	1473	0.000116404	0.000116696	7.78911e-05	0.000229846
Ppp1r11	1410	0.000114094	0.000114254	0.000102112	0.000229129
Rbm3	1896	0.000142622	0.000143672	0.000323028	0.000229059
Gm4832	250	4.40613e-05	4.38242e-05	1.4856e-05	0.000229
Bnip2	1091	0.000107549	0.000107815	7.84554e-05	0.000228942
Gapdh-ps15	2203	0.000162284	0.000163649	0.000901556	0.000228911
Uba3	1057	0.000104977	0.000104798	5.77191e-05	0.000228557
Gabarap	1717	0.000131088	0.000131936	0.000252723	0.00022844
Ica1l	293	6.69645e-05	6.66078e-05	3.1904e-05	0.000228408
Aip	887	9.49477e-05	9.51013e-05	5.9408e-05	0.000227842
Psmb4	2060	0.000152028	0.000152984	0.000202557	0.000227658
Gm8430	1336	0.000118623	0.000119142	0.000401886	0.000227504
Vpreb1	123	8.15278e-05	8.16188e-05	9.95162e-05	0.000227444
Spa17	150	3.02719e-05	3.00416e-05	1.33621e-05	0.00022722
Npc2	1958	0.000150524	0.000151344	0.000179517	0.000227195
Cavin3	285	5.14951e-05	5.13183e-05	1.70734e-05	0.00022698
Eif1a	1638	0.000133439	0.000133758	0.00014687	0.000226791
Serbp1	2338	0.00016955	0.000170658	0.000249604	0.000226623
Tnnc1	763	7.40833e-05	7.39277e-05	3.55462e-05	0.000225785
Gm10080	1085	9.84645e-05	9.87375e-05	9.40712e-05	0.000225759
Gm5854	1433	0.000124842	0.000125392	0.000355925	0.00022517
Lclat1	926	9.18373e-05	9.16744e-05	3.5484e-05	0.000225035
Ubtfl1	133	2.83423e-05	2.80771e-05	1.42943e-05	0.000224613
Cib2	1421	0.000118426	0.000118662	0.000109606	0.00022437
Uchl3	616	6.08571e-05	6.06339e-05	2.47757e-05	0.000224304
Ssna1	1448	0.000115115	0.000115126	6.71551e-05	0.000224071
Tcn2	2466	0.00017773	0.000179128	0.000349241	0.000224053
Scarb2	1733	0.000139516	0.000139955	0.000125666	0.000223556
Pdap1	1120	0.000105987	0.000106164	0.000109636	0.000223439
Eif5a	2069	0.000153685	0.000154635	0.00025693	0.000223235
Sys1	1851	0.000143417	0.000144031	0.000176838	0.000223215
Pofut2	844	8.99471e-05	9.02272e-05	4.82599e-05	0.000223096
Chmp3	2292	0.000167501	0.000168419	0.000234308	0.000222799
2310009B15Rik	1487	0.000117987	0.000117894	5.13103e-05	0.000222773
Tmed3	198	9.74955e-05	9.81653e-05	0.000160395	0.000221865
Ap4b1	1476	0.000126193	0.000126208	7.02649e-05	0.000221711
Bag1	1752	0.000135595	0.000135982	9.52237e-05	0.000221621
Washc3	355	4.59826e-05	4.55817e-05	1.69383e-05	0.00022144
Ppdpf	765	7.521e-05	7.48961e-05	2.7147e-05	0.000221413
Hsd3b7	335	5.96033e-05	5.94547e-05	2.59562e-05	0.000221275
Dohh	1960	0.000148029	0.000148838	0.000271646	0.00022008
Uqcc2	1463	0.000116029	0.000116392	0.00010637	0.000219835
Prelid1	2187	0.00016405	0.000164983	0.000211397	0.000219352
Mrpl48	615	6.44284e-05	6.41261e-05	2.0479e-05	0.000218592
Aldoa	2062	0.000154236	0.00015538	0.000617066	0.000218421
Igf2bp1	430	4.93585e-05	4.90498e-05	2.0916e-05	0.000218231
Tspo	1310	0.00010703	0.000107121	6.31659e-05	0.000217468
Rac1	1911	0.000142421	0.000142798	9.16434e-05	0.000217264
Cdc34	1864	0.000141616	0.000142313	0.000212031	0.000217206
Arl3	1029	0.000105291	0.000105252	8.51692e-05	0.000216989
Tmem242	1641	0.000131611	0.000131885	0.000114786	0.000216967
Dtnbp1	1305	0.000105994	0.000106236	7.725e-05	0.000216883
Sf3a3	665	8.51696e-05	8.47075e-05	3.63426e-05	0.000216827
P3h3	109	5.08565e-05	5.07277e-05	3.31239e-05	0.000216747
Grcc10	1699	0.000131954	0.000132747	0.000261405	0.000216727
Bbip1	609	6.7275e-05	6.70772e-05	3.63409e-05	0.000216076
Rps27a	1411	0.000120831	0.000121263	0.000343492	0.000215817
Ccdc184	837	8.88786e-05	8.8625e-05	4.47729e-05	0.000215488
Map1lc3b	1957	0.000144604	0.000145325	0.000170293	0.000215282
Pcmt1	1577	0.000123541	0.000123735	7.87256e-05	0.000215259
Xpa	1423	0.000116458	0.000116595	5.80216e-05	0.000215149
Tnfrsf23	165	7.4991e-05	7.50853e-05	4.59337e-05	0.000214936
Serpinb6a	1634	0.00012524	0.000125753	0.000139661	0.00021474
Camk1	411	7.2269e-05	7.22172e-05	3.58517e-05	0.000214668
Ndufc2	138	6.55527e-05	6.57975e-05	4.32438e-05	0.000214006
Sarnp	948	8.70384e-05	8.66001e-05	3.30948e-05	0.00021374
Bco1	200	8.00457e-05	8.01785e-05	5.53882e-05	0.000213703
Sat1	1396	0.000114362	0.000114737	0.00010367	0.000213461
Actr10	1524	0.000117121	0.000117179	5.71576e-05	0.000213124
Gucy1b1	1054	9.7943e-05	9.79051e-05	4.31513e-05	0.000212683
AW551984	93	4.24292e-05	4.22475e-05	1.84204e-05	0.000212558
Serinc2	791	8.41559e-05	8.37823e-05	3.89134e-05	0.000212322
Abcb4	1525	0.000118175	0.000118006	5.01423e-05	0.000212169
Mrpl32	1000	8.60673e-05	8.58004e-05	3.30853e-05	0.000211891
Lor	585	7.43665e-05	7.40948e-05	4.06702e-05	0.00021162
Bloc1s6	187	4.08193e-05	4.05239e-05	2.07894e-05	0.000211491
Rer1	840	8.65356e-05	8.66245e-05	4.26664e-05	0.000211275
H13	565	8.3275e-05	8.3395e-05	5.32149e-05	0.000210895
Smim7	1490	0.000118872	0.000119241	0.000106482	0.000210684
Csn3	126	8.06695e-05	8.04702e-05	4.65938e-05	0.000210607
Ggh	474	6.61222e-05	6.59348e-05	3.21931e-05	0.00021041
Gnb2	1973	0.000148793	0.000149225	0.000114845	0.000210132
Yipf5	1671	0.000133013	0.000133374	0.000113237	0.000209841
Pfdn6	1200	0.000103828	0.00010408	9.53079e-05	0.000209697
Ahi1	1051	0.000104242	0.000104162	6.3701e-05	0.000209587
Odc1	1991	0.000146625	0.000147116	0.000129729	0.000209573
Aqp3	127	0.000101875	0.000102047	6.06696e-05	0.000209178
Zcchc17	1495	0.000118791	0.000118999	7.35138e-05	0.00020896
Gm6981	2216	0.000160685	0.000161734	0.000263031	0.000208688
Dbi	941	8.19266e-05	8.20711e-05	7.0173e-05	0.000208632
Rpp25l	385	4.59187e-05	4.55387e-05	1.92063e-05	0.000208603
Polr2j	1669	0.000127961	0.00012846	0.000180527	0.000208375
Cfl2	447	7.03556e-05	7.01278e-05	4.32827e-05	0.00020825
Gdap1l1	2288	0.000166843	0.000167799	0.000222146	0.000208121
Tm4sf20	158	0.000146843	0.000147394	0.000112467	0.000207652
Mrpl22	412	4.94794e-05	4.92511e-05	2.37348e-05	0.000207316
Ndufs6	986	8.90856e-05	8.89904e-05	4.53364e-05	0.000207142
Gm31816	168	7.18943e-05	7.17792e-05	3.72886e-05	0.000206902
Mlycd	1335	0.000108899	0.000108803	5.19803e-05	0.000206818
Tmem219	649	6.63738e-05	6.60993e-05	2.30926e-05	0.00020674
Tpra1	2229	0.000161787	0.00016255	0.000191604	0.000206691
Vim	170	9.33584e-05	9.33795e-05	0.000114177	0.000206095
Rps4x	991	9.89968e-05	9.93844e-05	0.000126677	0.000205838
Fkbp9	1344	0.000117344	0.000117393	6.84666e-05	0.00020566
Krt8	2196	0.000162219	0.000163204	0.000285765	0.000205623
Pabpc1	1453	0.000140411	0.00014065	0.000146422	0.000205288
Zrsr1	2024	0.000153681	0.0001544	0.000171585	0.000205139
Fbxo4	1257	0.00010292	0.000102717	4.08141e-05	0.000204883
Pld3	1354	0.000125096	0.000125626	0.000152388	0.000204846
Eif2b2	1123	0.000105599	0.000105646	6.51454e-05	0.000204801
Qpctl	1752	0.000132455	0.000132593	6.96223e-05	0.000204748
Tor2a	1427	0.000114001	0.000113913	6.17689e-05	0.000204401
Adam23	463	6.66853e-05	6.62559e-05	2.79529e-05	0.000203899
Isoc2b	188	4.92899e-05	4.90025e-05	3.05421e-05	0.00020378
Polr2g	809	7.40103e-05	7.3912e-05	3.95846e-05	0.000203544
Ppp1ca	2288	0.000169911	0.00017086	0.000209939	0.000203511
Sat2	160	3.10673e-05	3.0879e-05	1.40545e-05	0.00020326
Imp3	2242	0.00016131	0.000162033	0.000148366	0.000202975
Sppl2a	1358	0.000112773	0.00011281	5.73607e-05	0.000202964
Psma6	1309	0.00010386	0.000104233	0.00011752	0.00020294
Tpd52	2176	0.00015911	0.000159861	0.000166329	0.000202924
Lztfl1	785	8.79972e-05	8.81354e-05	4.36866e-05	0.00020259
Trir	1721	0.000137973	0.000138604	0.000153689	0.000202508
Dmac1	1148	9.83641e-05	9.83434e-05	6.14628e-05	0.000202347
Th	146	8.02078e-05	8.02674e-05	5.87576e-05	0.000201624
Krtap17-1	154	0.000103036	0.000103031	7.72872e-05	0.000201551
Cstb	667	7.12952e-05	7.13307e-05	6.83574e-05	0.000201504
Catip	157	4.15348e-05	4.12539e-05	1.94847e-05	0.000201148
Pon2	603	7.40287e-05	7.38362e-05	3.53032e-05	0.000201046
Ndufs4	1311	0.000108662	0.000108979	0.000109303	0.000201038
A330040F15Rik	189	4.42658e-05	4.40227e-05	2.45025e-05	0.000200976
Gpbar1	131	0.000123525	0.000123702	9.91776e-05	0.00020044
Uqcc3	2082	0.000152872	0.000153522	0.000181099	0.000200344
Ss18l2	1504	0.000115629	0.00011578	6.7311e-05	0.000200259
Rhog	1634	0.000129317	0.000129487	8.02173e-05	0.000200149
Eif2s2	2076	0.000154145	0.00015494	0.000229579	0.000200062
Itgb1bp1	1342	0.000107979	0.000107931	4.88782e-05	0.000199929
1110032A03Rik	1293	0.000105549	0.00010524	3.84141e-05	0.000199658
Lamtor1	1606	0.000122498	0.000122845	9.747e-05	0.000199527
Csnk2b	1564	0.000122388	0.000122598	8.20644e-05	0.000199443
Grpel2	594	5.80011e-05	5.76812e-05	2.23478e-05	0.000199394
Gm5069	2319	0.000166666	0.000167934	0.000524228	0.000199327
Zfp511	834	8.23841e-05	8.18767e-05	3.29414e-05	0.000199154
Gm5617	717	6.75128e-05	6.71936e-05	2.61668e-05	0.000199019
Tmem130	1043	9.2881e-05	9.27859e-05	3.84761e-05	0.000198859
Chmp2a	1277	0.000102812	0.000103094	0.000101059	0.000198843
Aig1	1407	0.000118552	0.000118895	0.000132269	0.000198645
Gale	688	8.16595e-05	8.12877e-05	4.22308e-05	0.000198281
Sccpdh	1647	0.000128531	0.000128628	7.4019e-05	0.000198195
Gm20522	314	4.58372e-05	4.53633e-05	1.63776e-05	0.000198192
Zfp600	92	4.54473e-05	4.52303e-05	2.34241e-05	0.000198003
Il17rd	62	2.82643e-05	2.81397e-05	1.59258e-05	0.0001978
Zwint	1915	0.000143697	0.000144264	0.000149758	0.000197735
Ghr	681	8.69069e-05	8.6628e-05	4.66079e-05	0.000197551
Rpl18a	1487	0.000124787	0.00012521	0.000251988	0.000197219
Cd164	2191	0.000159775	0.000160717	0.000319863	0.000197194
1600014C10Rik	287	5.5517e-05	5.52858e-05	2.10608e-05	0.000197025
Ywhag	1837	0.000144742	0.000145301	0.000258771	0.000196737
Gtf3c6	1621	0.000128461	0.000128899	0.000141379	0.000196046
Csnk2a2	819	9.35942e-05	9.33806e-05	5.59795e-05	0.000195803
Ric3	1381	0.000110123	0.000109898	4.77147e-05	0.000195685
Ccpg1os	493	5.27303e-05	5.2302e-05	1.95262e-05	0.000195535
N4bp2l1	357	6.51167e-05	6.48118e-05	3.18031e-05	0.000195407
Fbxo44	2051	0.000151652	0.000152491	0.000233294	0.000195161
Snrpd1	1009	8.71541e-05	8.69458e-05	4.22967e-05	0.000194873
Gm11007	828	7.48374e-05	7.44014e-05	2.59259e-05	0.00019455
Hist1h2bq	621	7.65099e-05	7.61508e-05	3.64814e-05	0.000193899
Arl6ip5	1857	0.000141617	0.000142132	0.000133624	0.000193435
Gm6637	1093	9.398e-05	9.37791e-05	4.84547e-05	0.000192686
Tmem14c	1825	0.000137819	0.00013864	0.000274154	0.000192668
Maea	1449	0.000125601	0.00012592	0.000113698	0.000192388
Cenpx	753	7.26294e-05	7.21911e-05	2.62611e-05	0.000192154
Pank2	1108	9.13922e-05	9.13517e-05	5.09781e-05	0.000192109
Psg26	110	6.91123e-05	6.91493e-05	8.10687e-05	0.000192025
Emc3	438	5.17536e-05	5.14363e-05	1.66707e-05	0.000191803
Nmb	553	5.98827e-05	5.93308e-05	2.08583e-05	0.000191768
Qdpr	1763	0.000131743	0.000132035	0.000102829	0.000191472
Ndufb7	1028	8.94624e-05	8.92393e-05	4.48172e-05	0.000191464
Lynx1	103	4.70807e-05	4.67467e-05	2.06789e-05	0.000191421
Eef1akmt1	1047	8.89078e-05	8.87222e-05	4.54648e-05	0.000191135
Rtcb	1784	0.000139728	0.000140215	0.000157717	0.000190892
Slc24a3	179	8.68797e-05	8.6749e-05	5.41754e-05	0.000190877
Hypk	852	7.81082e-05	7.79295e-05	3.74794e-05	0.000190811
Cuta	1163	9.63498e-05	9.66053e-05	0.00010566	0.000189634
Dcbld1	172	4.84529e-05	4.81701e-05	2.12214e-05	0.000189616
Arpc5	1991	0.000153012	0.000153644	0.000198692	0.00018911
Gpaa1	1791	0.00013478	0.000135108	0.000101506	0.000189067
Scamp4	1375	0.000107473	0.000107248	4.19973e-05	0.000188756
Nfkb2	789	8.82463e-05	8.80122e-05	4.44853e-05	0.000188574
Gm5177	2372	0.000170124	0.000171417	0.000465447	0.000188418
Snap25	848	9.91289e-05	9.94495e-05	0.00011573	0.000188388
Phlda1	316	5.3519e-05	5.3093e-05	2.24277e-05	0.000188264
Chmp4b	2156	0.000155885	0.000156539	0.000210258	0.000188247
Psmc2	1465	0.000116702	0.000117087	0.000119717	0.000188207
Dpy30	1103	9.93563e-05	9.92908e-05	5.88365e-05	0.000188199
Nit1	2173	0.000158701	0.000159256	0.000133637	0.000187997
Vps25	1607	0.000124614	0.000125181	0.000184007	0.000187942
Hagh	1214	9.77805e-05	9.76894e-05	4.66159e-05	0.000187872
Alkbh2	842	8.01507e-05	7.96513e-05	2.67974e-05	0.000187227
Eif4e	2198	0.000157968	0.000158587	0.000144073	0.000186637
Insm1	1820	0.000141549	0.000141921	0.000200728	0.000186502
Cep83	1057	8.88013e-05	8.86038e-05	3.83134e-05	0.000186072
Slc25a3	1739	0.000138783	0.000139234	0.000154339	0.000185933
Crlf2	1169	0.000106731	0.000106811	7.47003e-05	0.000185758
Ccni	1447	0.000116116	0.000116023	6.86207e-05	0.000185608
Rpsa	2358	0.000174736	0.000175545	0.000266094	0.000185281
Cfb	104	4.53831e-05	4.51897e-05	2.36587e-05	0.000185208
Ergic3	530	8.48307e-05	8.49589e-05	7.99468e-05	0.000184882
Cd9	1617	0.000130357	0.000130869	0.000171649	0.000184732
Rchy1	989	8.71736e-05	8.67104e-05	2.97221e-05	0.000184669
Clta	2309	0.000167248	0.000168371	0.000462064	0.000184619
Nol4l	497	5.19655e-05	5.16385e-05	2.07634e-05	0.000184602
Ebpl	1316	0.000111416	0.000111163	5.12694e-05	0.000184547
Ctdnep1	1880	0.00013926	0.000139558	0.000128582	0.000184228
Adam10	1484	0.000123439	0.000123619	0.000109003	0.000183989
Atp6v1c1	1441	0.000125704	0.000125695	9.70656e-05	0.000183907
Cby1	709	7.27185e-05	7.25791e-05	4.64593e-05	0.000183749
Dpm1	771	7.53516e-05	7.51026e-05	2.8377e-05	0.000183703
Capns1	2532	0.000179616	0.000180939	0.000465456	0.000183682
Tent5b	334	6.02862e-05	5.99789e-05	3.13254e-05	0.000183548
Syngr1	1301	0.000113905	0.000113976	7.31491e-05	0.000183418
Dusp10	295	6.87649e-05	6.84688e-05	4.1137e-05	0.000183411
Trpv1	111	9.18124e-05	9.17926e-05	5.75709e-05	0.000183263
Maip1	1473	0.000111844	0.00011175	5.25127e-05	0.000183208
Tmem38b	539	5.63384e-05	5.57647e-05	1.63812e-05	0.000183088
Gm5512	461	4.97101e-05	4.93111e-05	1.47893e-05	0.00018304
Scel	576	7.6302e-05	7.60833e-05	4.273e-05	0.00018301
Tmem107	1002	0.000102277	0.000102302	5.99883e-05	0.000183002
Exosc3	1533	0.000120585	0.000120646	9.13216e-05	0.000182713
Anxa11	1015	9.85488e-05	9.83036e-05	5.85579e-05	0.000182676
Zfp707	492	5.2046e-05	5.15571e-05	1.7845e-05	0.000182399
Chchd7	552	5.4386e-05	5.4129e-05	2.2167e-05	0.000182202
Mrps34	1693	0.000127858	0.000128429	0.000176768	0.000181672
Krt222	1470	0.000113794	0.000113616	5.20907e-05	0.000181625
Ndufs8	1020	9.61952e-05	9.62222e-05	5.30119e-05	0.000181431
Spcs3	1961	0.000151982	0.00015253	0.000183378	0.000181125
Sap18	1769	0.000134306	0.000134622	0.000133631	0.000180601
Mrps17	1430	0.000112115	0.000112203	9.6232e-05	0.00018038
Mff	2006	0.000146128	0.000146672	0.000140836	0.000180164
Pole4	278	3.80929e-05	3.78394e-05	1.78868e-05	0.000180084
Eif6	1674	0.000126377	0.000126473	7.64673e-05	0.000179871
8430429K09Rik	1996	0.000144932	0.000145064	9.01425e-05	0.000179684
Gm30198	106	5.53281e-05	5.5286e-05	2.73422e-05	0.000179267
Efcab10	159	8.52426e-05	8.54579e-05	7.07605e-05	0.000178555
Gm30238	293	3.80767e-05	3.76426e-05	1.45275e-05	0.000178483
Serpini1	531	7.46465e-05	7.45642e-05	5.37531e-05	0.000177816
Rfx6	1592	0.000128462	0.000128533	8.40092e-05	0.000177583
Gpc4	1673	0.000136857	0.000137108	0.000125522	0.000177355
Jtb	873	9.01392e-05	9.01721e-05	5.05601e-05	0.000177312
Samm50	2155	0.000154224	0.000154952	0.000197654	0.000177113
Spryd7	411	5.97606e-05	5.93835e-05	2.93776e-05	0.000177106
Tmem71	1583	0.000121742	0.000122095	0.000127039	0.000176974
Usp30	1288	0.000103766	0.000103715	5.66989e-05	0.000176911
Tsg101	1755	0.000134653	0.000134699	8.5829e-05	0.000176783
Slc25a39	2278	0.000163504	0.00016429	0.000221277	0.000176724
Ndufv1	1142	0.000103483	0.000103721	0.000116381	0.000176477
Babam2	1340	0.000122793	0.000122893	9.39951e-05	0.000176394
Spout1	474	5.9873e-05	5.94122e-05	1.94288e-05	0.000176272
Tpi1	2052	0.000150542	0.000151339	0.00030168	0.000175944
Ppia	1506	0.000122339	0.000122774	0.000356023	0.000175821
Pkdcc	1286	0.000108472	0.000108475	7.55737e-05	0.0001756
Depp1	845	7.34344e-05	7.31815e-05	2.99454e-05	0.000175582
Vps4a	1479	0.000118147	0.00011805	5.85097e-05	0.000175561
Prkn	206	3.43865e-05	3.42839e-05	2.30788e-05	0.000175561
Yaf2	1782	0.000130428	0.000130486	6.92687e-05	0.000175402
Abcc2	644	6.20272e-05	6.15942e-05	2.11547e-05	0.000175396
Vpreb2	96	8.04647e-05	8.06854e-05	9.96846e-05	0.00017522
Nup98	2035	0.00014678	0.000147194	0.000151091	0.000175136
Lamp1	2724	0.000191479	0.000192719	0.000442648	0.000175036
Zfp948	425	5.65103e-05	5.61369e-05	2.93588e-05	0.000174734
Gm5766	1719	0.000133864	0.000134142	0.000137116	0.000174666
Stx8	1357	0.000111814	0.000111851	6.39479e-05	0.000174591
Atg3	2059	0.000148452	0.000148979	0.000140368	0.000174239
Sec11a	1043	8.59654e-05	8.57367e-05	3.50802e-05	0.000174183
Psma7	1801	0.000134489	0.000135224	0.000232681	0.000173905
Ces1g	123	4.05611e-05	4.05109e-05	8.01396e-05	0.000173457
Rasgef1a	519	5.51342e-05	5.46151e-05	2.04429e-05	0.000173428
Eif3f	1615	0.00013334	0.000133646	0.000173722	0.000172889
Rundc3a	2753	0.000191493	0.000192793	0.000342878	0.000172872
Sorcs1	130	8.48518e-05	8.48209e-05	9.24212e-05	0.000172856
Ltbr	1797	0.000136064	0.000136695	0.00026555	0.000172853
Eno2	1366	0.000111013	0.000110927	6.37314e-05	0.000172805
Rasd2	510	6.7358e-05	6.70565e-05	3.8224e-05	0.000172653
Tmem41a	1113	8.91782e-05	8.87143e-05	2.82509e-05	0.000172455
Drap1	2254	0.000165253	0.000166249	0.000338299	0.000172253
Atp6v0e	2512	0.000177462	0.00017884	0.000504569	0.000172246
Tmed6	290	4.97389e-05	4.94495e-05	2.37475e-05	0.000172154
Vasp	813	7.97409e-05	7.9292e-05	3.48596e-05	0.000172088
Bcl2l1	960	0.00010265	0.000102356	5.89596e-05	0.000171957
Abhd16a	2388	0.000169442	0.000170221	0.000197426	0.000171882
Eif4e2	1392	0.000107652	0.000107447	5.28062e-05	0.000171754
Tpt1	828	9.27276e-05	9.30185e-05	8.58878e-05	0.000171738
Calm3	2475	0.000176899	0.000178029	0.000382922	0.000171655
Tspan31	1735	0.000130368	0.000130417	8.03573e-05	0.000171499
Cpt1c	660	6.77465e-05	6.72821e-05	2.73592e-05	0.000170901
Rasgrf1	951	8.66121e-05	8.68515e-05	7.58788e-05	0.000170726
Ctsd	2275	0.000164033	0.000165118	0.000457643	0.000170512
Actr1a	2116	0.0001565	0.000157048	0.000198475	0.000170457
Dnaja1	2213	0.000162111	0.000162687	0.000170334	0.000170383
Tmem62	1760	0.000129443	0.000129455	6.58295e-05	0.00017017
Snrpd2	1226	9.85541e-05	9.86065e-05	6.38981e-05	0.000170148
Eif3g	2249	0.000163506	0.000164447	0.000311775	0.000169786
Emc2	1902	0.000147995	0.00014834	0.000161066	0.000169777
Pnpla2	1171	9.65182e-05	9.60892e-05	4.20267e-05	0.00016943
AU022252	185	5.63785e-05	5.61392e-05	3.69662e-05	0.000169258
Ccdc40	1326	0.000102938	0.000102835	5.16459e-05	0.000169137
Ywhab	2048	0.000151271	0.000151751	0.000154333	0.000169083
Mrps7	204	3.37553e-05	3.3439e-05	1.25861e-05	0.000169051
Snrpf	1415	0.000115921	0.000115939	8.17961e-05	0.000168705
Mrpl40	2173	0.000153905	0.000154304	0.000119069	0.000168533
Gas5	981	9.03907e-05	9.04325e-05	6.21112e-05	0.000168498
Ippk	435	7.17462e-05	7.15958e-05	4.0263e-05	0.000168427
Chchd1	1277	0.000101401	0.000101325	6.10861e-05	0.000168193
Psmc1	1935	0.000142593	0.000143382	0.000276377	0.000168108
Fuca2	1542	0.000128457	0.00012879	0.000120958	0.000167248
Rpl8	1920	0.000147424	0.000147975	0.000263464	0.000167021
Trpc1	812	7.6395e-05	7.59787e-05	2.43913e-05	0.000166911
Map3k6	848	7.58258e-05	7.51786e-05	2.1929e-05	0.000166752
Mrpl35	804	8.43243e-05	8.43999e-05	7.80303e-05	0.000166665
Tent5a	230	7.31432e-05	7.28842e-05	4.57052e-05	0.000166588
Gpr107	726	6.76856e-05	6.72845e-05	2.21059e-05	0.000166303
Abhd6	724	6.75208e-05	6.69422e-05	2.02046e-05	0.000166294
Tmem106c	719	7.96215e-05	7.9402e-05	3.84731e-05	0.000165924
Tpm1	1052	9.86901e-05	9.85724e-05	7.0584e-05	0.0001657
Eif2s1	2088	0.00015012	0.00015049	0.000114826	0.000165644
Htatip2	1582	0.000119723	0.000119919	0.000107491	0.000165402
Got2	2888	0.000199998	0.000201576	0.000537517	0.000165156
Ccz1	1093	9.55736e-05	9.53439e-05	5.21648e-05	0.000164669
Ube2w	2593	0.000181011	0.000181868	0.000225035	0.00016457
Rps3	1998	0.000152526	0.000153049	0.000348846	0.000164551
Chchd6	1619	0.000120264	0.000120203	7.03891e-05	0.000164502
Gaa	2573	0.000182495	0.000183377	0.000265652	0.000164481
C1qtnf4	1532	0.000118397	0.000118362	6.83552e-05	0.00016446
Kti12	1250	9.96e-05	9.91789e-05	3.89498e-05	0.000164197
Mpnd	1012	9.99634e-05	9.97483e-05	5.65254e-05	0.000164079
Habp4	1408	0.000115346	0.000115133	6.15436e-05	0.000164002
Bloc1s2	1329	0.000106975	0.000106547	4.24347e-05	0.000163872
Inppl1	2615	0.00018592	0.000186799	0.000270442	0.000163724
Rpl4	1906	0.000146999	0.000147521	0.000396062	0.000163687
Clptm1	2386	0.000173032	0.000173689	0.000222938	0.000163513
Mrpl44	1346	0.000109164	0.000108868	4.59545e-05	0.000162895
Synrg	566	7.12204e-05	7.09607e-05	3.21167e-05	0.000162692
Ranbp1	2525	0.000178462	0.000179615	0.00033287	0.000162525
Gtf3a	1649	0.000123997	0.000124129	8.92599e-05	0.00016212
Mtpn	1998	0.000149883	0.0001505	0.000185761	0.000162072
Etv4	117	8.68804e-05	8.66723e-05	4.09268e-05	0.000161795
Fam81a	124	9.77435e-05	9.79082e-05	6.79781e-05	0.000161676
Slc17a9	871	8.66194e-05	8.63736e-05	4.10657e-05	0.00016129
Rnf7	1960	0.000143696	0.000144146	0.000157263	0.000161251
Slc6a19	576	7.02966e-05	7.00017e-05	3.04559e-05	0.000160966
Apbb1	2316	0.000168118	0.000168636	0.000163202	0.000160906
Nptn	1604	0.000127408	0.000127289	7.78693e-05	0.000160809
Eif3j1	2162	0.000154992	0.000155383	0.000139115	0.000160737
Klhdc2	1899	0.000142586	0.000142902	0.00012764	0.000160581
Pgrmc2	1114	9.6829e-05	9.65585e-05	4.67557e-05	0.000160392
BC052040	241	3.74745e-05	3.70346e-05	1.26361e-05	0.00016021
Bc1	28	3.2689e-05	3.27016e-05	4.95968e-05	0.000159972
Ttc13	2295	0.000161758	0.000162194	0.000146145	0.000159571
Zbtb8os	1250	0.000101771	0.000101596	5.72654e-05	0.000159557
Zfp965	601	5.97586e-05	5.93123e-05	2.14513e-05	0.000159436
Farsb	1080	9.04906e-05	9.01936e-05	3.28605e-05	0.000159417
Golph3	2296	0.000166788	0.000167271	0.000164197	0.000159415
Mpi	1393	0.000117472	0.000117155	5.57595e-05	0.00015934
Mul1	1397	0.000106754	0.000106477	4.70585e-05	0.000159143
Atp6v1e1	2344	0.000165865	0.00016682	0.000292464	0.000159067
Naglu	737	8.33944e-05	8.33855e-05	4.59726e-05	0.000158847
Pon3	792	8.73902e-05	8.7221e-05	4.98853e-05	0.000158657
Kcnk1	1121	0.000103735	0.000103987	0.000110433	0.000158565
Yipf3	980	8.90681e-05	8.88071e-05	4.19203e-05	0.000158437
Ssr1	2197	0.000158687	0.000159142	0.000152388	0.000158052
Zkscan2	672	6.23826e-05	6.18584e-05	2.12374e-05	0.000158018
Klhl29	223	5.59301e-05	5.57487e-05	3.45953e-05	0.000157984
Dcun1d5	1005	8.75107e-05	8.73617e-05	5.25379e-05	0.000157733
Rom1	204	4.27893e-05	4.25231e-05	1.80459e-05	0.000157595
Epn1	2341	0.000163416	0.000164162	0.000206484	0.000157446
Stard6	1021	9.26913e-05	9.23895e-05	3.98201e-05	0.000157142
Snu13	1827	0.00013364	0.000133604	8.40159e-05	0.000156768
Fam216a	790	7.9346e-05	7.92051e-05	3.82192e-05	0.000156668
Ccnk	1501	0.000111476	0.000111182	4.57742e-05	0.000156539
Frg1	1639	0.000121856	0.000121762	5.98728e-05	0.000156479
Gm7334	789	9.26589e-05	9.28557e-05	0.000321725	0.000156323
Eef1a1	2250	0.000166566	0.000167083	0.000769508	0.000155986
Stub1	2222	0.000157373	0.000157901	0.000184826	0.000155899
Ppp2r5e	742	8.01686e-05	7.97953e-05	4.35342e-05	0.000155709
Nudt14	670	6.37075e-05	6.3456e-05	2.78664e-05	0.000155666
Gm8624	1693	0.000130834	0.000131038	0.00024984	0.000155426
Lyrm2	761	6.7167e-05	6.68477e-05	2.6213e-05	0.000155378
Psmd14	1991	0.000143741	0.000144385	0.000192102	0.000155364
Mturn	1073	8.95978e-05	8.91689e-05	3.44485e-05	0.000155338
Psat1	1170	9.5861e-05	9.5846e-05	6.19697e-05	0.000155141
Mpc2	1985	0.0001471	0.000147312	9.52107e-05	0.000155012
Arhgdia	2728	0.000189578	0.000190776	0.000433822	0.000154998
Ccdc112	1508	0.000121897	0.000121752	7.00514e-05	0.00015494
Med28	1985	0.000145334	0.000145973	0.000219374	0.000154454
Ap3m1	2269	0.000158162	0.000158729	0.000139371	0.000154393
E2f4	1815	0.000132901	0.000133464	0.000155403	0.000154362
Tm2d2	700	6.63716e-05	6.60778e-05	3.05118e-05	0.000154353
Cacybp	1601	0.000129229	0.000129235	9.47991e-05	0.000154309
Selenok-ps1	709	6.55195e-05	6.50666e-05	2.26971e-05	0.000154296
Myl6	1224	0.000103818	0.000104008	0.000136395	0.000154247
Tmem252	118	8.02947e-05	8.02711e-05	6.26236e-05	0.000154225
Eaf1	1277	0.000105202	0.000105184	6.95911e-05	0.000154193
Cope	1868	0.000137341	0.000137463	9.8704e-05	0.000154093
Ctnnd2	1294	0.000118068	0.000117805	6.51206e-05	0.000154065
Psmd13	1803	0.000135082	0.000135187	9.38925e-05	0.000153832
Supt3	1513	0.000114148	0.000114067	6.5696e-05	0.000153809
Pacrg	1636	0.000122698	0.000122721	7.9273e-05	0.000153753
Rab2a	2284	0.00016709	0.000167734	0.000224564	0.00015375
Fkbp1a	1882	0.000140552	0.000141212	0.000277367	0.000153555
Atcay	105	7.69608e-05	7.70536e-05	4.99431e-05	0.000153418
Eif4a1	2653	0.000186469	0.000187571	0.000350714	0.000153399
Jmjd6	2190	0.000154703	0.0001551	0.000124939	0.000153368
Grina	2336	0.000166859	0.000167936	0.000305084	0.000153307
Polr2i	1394	0.000110078	0.00011036	9.70122e-05	0.000153167
Vamp4	1400	0.000112266	0.000112061	5.68435e-05	0.000152944
Arhgap21	1750	0.000129488	0.000129458	7.83477e-05	0.000152891
Cggbp1	958	8.40108e-05	8.37175e-05	3.28903e-05	0.000152586
Pwp1	1383	0.000105499	0.000105213	4.37104e-05	0.000152129
Dusp3	2438	0.000169801	0.000170478	0.000179158	0.00015207
Mgst3	1470	0.000110193	0.000110135	6.16346e-05	0.000152048
Ube2s	1948	0.000141123	0.000141195	8.89167e-05	0.000151999
Man2b2	1840	0.000145513	0.000145938	0.000195909	0.000151729
Cnih1	1436	0.00011537	0.00011522	7.84467e-05	0.000151563
Cwc15	1509	0.000112739	0.000112914	8.95349e-05	0.000151521
Mrpl13	1964	0.00014075	0.00014125	0.000149251	0.000151366
Lyve1	81	7.80234e-05	7.8083e-05	6.37018e-05	0.000151325
Snrnp27	1503	0.000115475	0.000115336	6.42797e-05	0.000151285
Tmem165	907	8.32557e-05	8.30942e-05	3.5985e-05	0.000151256
2810004N23Rik	2174	0.000153274	0.00015368	0.00011929	0.000151191
Hspe1	1658	0.000123018	0.000123261	0.000107353	0.00015117
Tiparp	1007	8.81996e-05	8.78425e-05	3.77185e-05	0.000151136
B9d1	1284	9.85944e-05	9.83644e-05	4.72343e-05	0.000150973
Gmfb	1903	0.000138375	0.000138785	0.000136748	0.000150711
Nefm	1517	0.000114368	0.000114328	6.74875e-05	0.000150644
Ncstn	2276	0.000164738	0.000165272	0.000181203	0.000150525
Cct2	2563	0.000182746	0.000183467	0.00023819	0.000150515
Txnl4b	1342	0.000107649	0.000107273	4.5941e-05	0.000150491
Spag6l	122	0.000128804	0.000129144	0.000100453	0.000150371
Phb2	2054	0.000146419	0.000146772	0.000148616	0.000150214
Traf3ip2	208	5.05471e-05	5.0399e-05	3.2622e-05	0.000150182
Mpp6	2312	0.000161021	0.000161666	0.000170752	0.000150101
Rnh1	2756	0.000189743	0.000190833	0.000354928	0.000150075
Tstd3	468	4.76358e-05	4.72417e-05	1.77978e-05	0.000149935
Ube2d3	2385	0.000170989	0.000171725	0.000228554	0.000149911
Psmd6	1260	0.000103042	0.000103174	8.79821e-05	0.000149678
Bak1	878	7.45585e-05	7.42733e-05	3.22258e-05	0.000149636
Cdc26	445	7.10504e-05	7.08982e-05	3.83386e-05	0.000149616
Arf3	2694	0.000190818	0.000191785	0.000301691	0.000149614
Cdc42	2812	0.000194244	0.000195533	0.000424894	0.000149489
Dnajc8	1856	0.000136882	0.000136928	9.3982e-05	0.000149479
Twistnb	987	8.95029e-05	8.92331e-05	3.9214e-05	0.00014939
Gosr2	2403	0.000168468	0.000169249	0.000204295	0.000149346
Rbbp7	1940	0.000140272	0.000140395	0.000109785	0.000149297
Col18a1	142	2.91444e-05	2.89681e-05	1.72879e-05	0.000149286
Zpr1	596	6.0064e-05	5.94919e-05	1.92714e-05	0.000149186
Alcam	893	9.95032e-05	9.94511e-05	7.18332e-05	0.000149105
Ublcp1	1800	0.000132283	0.000132566	9.92216e-05	0.000148935
Tmod3	1171	0.000104765	0.000104329	5.20485e-05	0.000148844
Polb	1601	0.000117572	0.000117179	4.62982e-05	0.000148815
Cldn7	1811	0.000132677	0.000133114	0.000161679	0.000148752
Pgam1	2678	0.000188153	0.000189344	0.000369658	0.000148724
Psg29	165	5.2845e-05	5.27342e-05	4.53809e-05	0.000148711
Rab3a	755	8.60543e-05	8.57703e-05	4.81777e-05	0.000148604
Cacnb3	2499	0.000173423	0.000174087	0.000186231	0.000148568
Map4	2298	0.000163856	0.000164247	0.000142315	0.000148472
4930453N24Rik	278	4.41513e-05	4.37976e-05	2.25656e-05	0.0001484
Znrf1	1437	0.00011557	0.000115356	6.57414e-05	0.000148307
Prkcb	947	9.58896e-05	9.57349e-05	6.44198e-05	0.000148286
Esco1	645	6.24995e-05	6.21978e-05	2.76773e-05	0.000148228
Nip7	1687	0.000126471	0.000126413	8.17559e-05	0.00014817
Cetn2	1190	0.000100591	0.000100367	4.42123e-05	0.000148127
Gm9234	1588	0.000125809	0.000126325	0.000359855	0.000148105
Pip4p1	1838	0.000132656	0.000132726	0.000105336	0.000147558
Cops5	1898	0.000135386	0.000135373	7.36681e-05	0.000147428
Gm6548	2247	0.000166716	0.000167337	0.000818528	0.000147407
Nrbp1	1892	0.000142204	0.000142232	9.29049e-05	0.000147322
Gm36198	1208	0.000105605	0.000105281	5.57504e-05	0.000147254
Stk39	990	9.64149e-05	9.6383e-05	5.9559e-05	0.000147221
Pnmal1	2399	0.000168764	0.000169341	0.000169815	0.000147213
Rhoa	2703	0.000188413	0.000189764	0.000447966	0.000147199
Slc15a4	924	9.22081e-05	9.16605e-05	4.00122e-05	0.000146967
Ywhaz	2634	0.000186699	0.000187834	0.000462865	0.000146575
Rab4b	992	8.41584e-05	8.3871e-05	3.93304e-05	0.000146385
Ank2	1928	0.00013933	0.000139319	8.76969e-05	0.000146383
Pigk	682	6.79195e-05	6.75277e-05	2.30737e-05	0.000146265
Wbp1	252	5.26217e-05	5.23123e-05	2.52978e-05	0.000145975
Rps23	1347	0.000112067	0.000112213	0.000237148	0.000145954
Dkk2	109	0.00015739	0.00015752	0.000123963	0.000145844
Pfdn2	2178	0.00015461	0.000155302	0.000205499	0.000145828
Anxa4	783	8.50931e-05	8.49093e-05	4.8317e-05	0.000145723
Srrd	1231	9.83462e-05	9.79611e-05	3.8242e-05	0.000145612
G6pc3	2101	0.000148886	0.000148978	0.000106413	0.000145468
Txndc15	2005	0.000148228	0.000148371	0.000113224	0.000145351
Ocel1	73	6.39271e-05	6.38317e-05	4.31265e-05	0.000145261
Elovl1	1733	0.00012752	0.000127474	7.96912e-05	0.000145005
Smarcb1	1954	0.000149291	0.000149534	0.00012703	0.000144961
Rmi2	265	5.54149e-05	5.52842e-05	4.28345e-05	0.000144746
Gm13552	1895	0.000136412	0.000136621	9.8172e-05	0.000144663
Arl2	1716	0.000127938	0.000128213	0.000101414	0.000144654
Tra2a	1673	0.000123273	0.000123157	6.79104e-05	0.000144443
Daglb	1458	0.000113303	0.000113076	5.66493e-05	0.000144223
Gls	1902	0.000138196	0.000138303	9.73873e-05	0.000144209
Gab2	54	2.98556e-05	2.97643e-05	2.15075e-05	0.000144174
Vdac3	1983	0.000143146	0.000143641	0.000174174	0.000143946
Clptm1l	959	8.86466e-05	8.8541e-05	5.21969e-05	0.000143807
Bmyc	1346	0.000110615	0.000110329	5.48213e-05	0.000143742
Mak16	1017	9.37288e-05	9.37387e-05	6.86358e-05	0.000143688
Med30	1319	0.000112212	0.000112079	6.59167e-05	0.000143687
Mark3	2581	0.000180495	0.00018136	0.000301599	0.000143681
Ascc1	951	8.11555e-05	8.07441e-05	3.24837e-05	0.000143427
Plpp2	2385	0.00016861	0.000169594	0.000301152	0.000143041
Rnf115	1429	0.000110773	0.00011045	4.95464e-05	0.000143
Gm10190	663	6.19191e-05	6.13709e-05	1.97199e-05	0.000142676
Mapre2	1327	0.000105204	0.00010487	4.89858e-05	0.000142605
St8sia3	557	6.79929e-05	6.76868e-05	3.42923e-05	0.000142601
Sgta	2504	0.000175182	0.000175957	0.000292826	0.000142586
Tceal8	992	9.62356e-05	9.62946e-05	8.5174e-05	0.000142581
Ccdc124	1846	0.000133709	0.000133891	0.000107947	0.000142218
Supt4b	448	4.78282e-05	4.73235e-05	1.66726e-05	0.000142036
Bahd1	1328	0.000103979	0.000103763	5.26112e-05	0.00014197
Milr1	245	3.38915e-05	3.35062e-05	1.37848e-05	0.000141876
Prr3	1239	9.7497e-05	9.70212e-05	3.51141e-05	0.000141719
Rgs9	935	9.55446e-05	9.54167e-05	7.28638e-05	0.000141685
Mrps24	784	7.03545e-05	7.01249e-05	3.37139e-05	0.000141682
Pcdhac2	201	3.62714e-05	3.61125e-05	2.29192e-05	0.000141672
Selenow	1154	0.0001054	0.000105492	9.36902e-05	0.0001416
Rps19bp1	1393	0.000111089	0.000111411	0.000127644	0.000141569
Cdc123	1175	9.26244e-05	9.21486e-05	3.24238e-05	0.00014145
Cmbl	664	6.15486e-05	6.11171e-05	2.28778e-05	0.000141434
Qpct	68	4.42698e-05	4.41628e-05	3.90904e-05	0.000140929
Znhit1	101	2.81693e-05	2.79506e-05	1.55922e-05	0.000140866
Tprkb	1652	0.000124244	0.00012405	6.53628e-05	0.000140728
Fbl	1270	0.000105146	0.000105025	6.52125e-05	0.000140681
Vopp1	1685	0.000123712	0.000123509	5.98513e-05	0.000140584
Vps29	1210	0.000100569	0.000100802	0.000110819	0.000140563
Dcaf17	595	7.39048e-05	7.36463e-05	4.03508e-05	0.000140402
Csnk1g2	2208	0.000158182	0.000158397	0.000129628	0.000140246
Eef1akmt2	584	5.57168e-05	5.54249e-05	2.552e-05	0.000140188
Ctnna2	265	4.47425e-05	4.42989e-05	1.88772e-05	0.000140059
Tspan15	1202	0.000111857	0.00011205	0.000131848	0.000140042
Psmd12	2159	0.000153228	0.000153513	0.000133679	0.000139615
Ndufb10	2362	0.000164717	0.000165352	0.000225305	0.000139584
Tcte2	88	6.54772e-05	6.53867e-05	4.2556e-05	0.000139571
Pdcd2	1646	0.000119992	0.000119963	7.87088e-05	0.000139357
Atp5b	2811	0.000197465	0.000198615	0.000421741	0.000139263
Ero1l	2454	0.000169007	0.000169546	0.000168734	0.000139063
Apmap	2247	0.000158418	0.000158729	0.000156594	0.00013883
C9orf72	1632	0.000122177	0.000122249	7.70778e-05	0.000138754
Irak3	96	6.09127e-05	6.10471e-05	3.37169e-05	0.000138575
Cltb	2191	0.000155233	0.000155579	0.000161113	0.000138502
Cuedc2	1609	0.000119931	0.000119919	7.37984e-05	0.000138057
Ten1	1866	0.000133438	0.000133719	0.00010751	0.000137947
Metap2	2656	0.000186542	0.000187484	0.000302578	0.000137933
Adh1	2181	0.000154319	0.000154872	0.000149952	0.000137717
Nras	2148	0.0001526	0.000152807	0.000104677	0.000137641
Gpx1	2205	0.000153891	0.000154475	0.000170944	0.000137585
Wdr1	2289	0.000164196	0.000165168	0.000332671	0.000137574
Ccl28	1296	0.000106275	0.000106145	6.41933e-05	0.000137335
Gm15032	689	8.07854e-05	8.07859e-05	4.5887e-05	0.000137246
Lamtor5	1251	0.000104501	0.000104708	8.66296e-05	0.000137188
Alg5	110	4.48648e-05	4.47656e-05	2.27794e-05	0.000136918
Denr	2274	0.000164905	0.000165752	0.000234113	0.000136901
Akr1c13	981	8.89446e-05	8.9083e-05	6.75792e-05	0.000136778
Tmtc2	645	7.99401e-05	7.98698e-05	5.32584e-05	0.000136771
Gm36738	185	5.40356e-05	5.385e-05	3.00708e-05	0.00013669
Dhrs7	2149	0.000153786	0.000154126	0.000177495	0.000136654
Galns	1174	0.000106084	0.000105844	6.43136e-05	0.000136643
Borcs7	1804	0.000141444	0.000141698	0.000137478	0.000136643
Trim24	1164	9.76355e-05	9.73246e-05	4.45446e-05	0.000136428
Creg1	1447	0.000116208	0.000116657	0.000178733	0.00013632
Vipr2	925	8.13783e-05	8.12798e-05	4.72566e-05	0.000136231
Fancc	1185	9.07912e-05	9.02002e-05	2.96495e-05	0.000136195
Gdap1	2177	0.000157311	0.000157792	0.000154783	0.000136136
Tmed2	1167	0.000109719	0.000109975	0.000163215	0.000136125
Mrpl2	829	7.6526e-05	7.61348e-05	3.11385e-05	0.00013593
Flywch2	662	7.40587e-05	7.37676e-05	4.21709e-05	0.000135864
Sel1l3	1825	0.000135678	0.000135578	8.26164e-05	0.000135833
Gm6793	2273	0.000160603	0.000160802	0.000146296	0.000135755
Tmem238	2042	0.000148321	0.0001489	0.000179287	0.000135686
Nudt18	1864	0.000136932	0.000136958	9.72383e-05	0.000135646
Twf1	2384	0.000165053	0.000165499	0.000137062	0.000135562
Coa4	133	3.13157e-05	3.10229e-05	1.371e-05	0.000135443
Kctd12b	575	7.54153e-05	7.51196e-05	4.82953e-05	0.000135409
Slc36a1	1905	0.000143806	0.00014385	0.000102533	0.000135286
Idh1	2326	0.000163061	0.000163743	0.000208993	0.000135122
Tmem134	2139	0.000149745	0.000150021	0.000142651	0.000134637
Tgds	428	4.44037e-05	4.39447e-05	1.57175e-05	0.000134517
Izumo4	943	9.31208e-05	9.29432e-05	5.14361e-05	0.000134454
Snap29	1295	0.000102098	0.000101835	5.02887e-05	0.000134439
Rrp1	2259	0.000166547	0.000167117	0.000208194	0.000134238
Lsm2	740	6.36071e-05	6.3103e-05	2.01894e-05	0.000133942
Arc	241	3.63875e-05	3.6141e-05	1.46488e-05	0.000133799
Prr13	1915	0.000138358	0.000138583	0.00010289	0.000133693
Rock2	1957	0.000150638	0.000151071	0.000229801	0.000133597
Tmem256	852	7.12951e-05	7.08672e-05	2.58283e-05	0.000133592
Dynlt1f	2212	0.000160506	0.000161383	0.000759643	0.00013341
Trappc4	2257	0.000157449	0.000157617	0.000112154	0.000133332
Klf4	919	8.5247e-05	8.49905e-05	4.82781e-05	0.000133205
Tlr3	132	3.94306e-05	3.93738e-05	2.97427e-05	0.000133192
Acd	1979	0.000138678	0.000138621	7.49191e-05	0.000133169
Vldlr	2461	0.000172968	0.0001736	0.000244778	0.000133034
Nanos1	497	6.2226e-05	6.19637e-05	3.67019e-05	0.000133024
Ttc1	1325	0.000107215	0.000107169	7.34032e-05	0.000132994
Cldn3	2420	0.00016725	0.000167665	0.000150339	0.000132881
Tiprl	1151	9.49547e-05	9.48949e-05	5.7754e-05	0.000132745
Capza2	2881	0.000199856	0.000201001	0.000348186	0.000132723
Tceal9	2072	0.000147404	0.000147565	0.00013755	0.000132721
Fam171b	2543	0.000179314	0.000179923	0.00021118	0.000132654
Nme3	1245	9.73117e-05	9.68846e-05	3.68723e-05	0.000132611
Pcnp	2450	0.000169857	0.000170461	0.000212949	0.000132583
Mapk6	2389	0.000168821	0.000169037	0.000134401	0.000132506
Mrpl14	1851	0.000134368	0.000134622	0.000125011	0.000132447
Erlec1	578	7.99365e-05	8.00467e-05	7.35045e-05	0.000132384
1110051M20Rik	965	8.28411e-05	8.25668e-05	3.99684e-05	0.000132186
Pnkd	1903	0.000137323	0.00013733	8.91129e-05	0.000132123
Polr2m	2763	0.000190567	0.000191733	0.000364654	0.000132093
Foxa3	1092	9.1803e-05	9.17773e-05	5.69872e-05	0.000131908
Ywhah	1120	0.000104099	0.00010408	8.77442e-05	0.000131702
Dnajc7	2528	0.000178725	0.000179367	0.000205821	0.000131462
Rabggtb	2537	0.000177377	0.000177742	0.000161425	0.000131349
Eef1d	1862	0.000146342	0.00014645	0.000126571	0.000131215
Timm13	1184	9.64057e-05	9.64918e-05	7.72957e-05	0.000131026
Ik	2229	0.000159883	0.000159926	0.000122566	0.000130914
Ros1	98	6.57421e-05	6.61223e-05	6.74045e-05	0.000130763
Ppt1	2289	0.000159108	0.000159541	0.000164432	0.000130598
Lsm8	1679	0.000122781	0.000122644	6.45132e-05	0.000130581
Med21	1018	8.85359e-05	8.83196e-05	4.55542e-05	0.000130493
0610009B22Rik	1494	0.000111204	0.000110893	4.94277e-05	0.00013039
Ttc14	2414	0.000171747	0.00017217	0.000178343	0.000130389
Ndufaf7	1334	0.000105243	0.000104866	4.91438e-05	0.000130309
Nop2	1931	0.000137248	0.000137143	7.63634e-05	0.000130246
Akirin2	2118	0.000147713	0.000147952	0.000138911	0.000130236
Ndufaf3	2174	0.000151927	0.000152321	0.000139311	0.000130073
Gps1	2831	0.000199227	0.000200395	0.000430829	0.000129961
Tymp	523	6.1506e-05	6.13089e-05	4.4493e-05	0.000129891
Dynlt1b	2214	0.000159475	0.00016026	0.00068709	0.000129889
Cops7a	2429	0.000170249	0.000170672	0.000154817	0.000129699
Dgkz	1558	0.000124639	0.000124577	8.64794e-05	0.000129639
Gal	86	4.1324e-05	4.12966e-05	2.90031e-05	0.000129568
Rpp21	1995	0.000143183	0.000143366	0.000102424	0.000129425
Rrp7a	2557	0.000179115	0.000179692	0.000197902	0.000129424
Gm15796	2301	0.000170435	0.000171044	0.000553626	0.000129046
Mesd	1322	9.99455e-05	9.95201e-05	4.14099e-05	0.000129014
Gm5176	1365	0.000105294	0.000105325	7.24262e-05	0.000128983
Ifnlr1	296	5.60942e-05	5.58801e-05	4.54762e-05	0.000128953
Sh3yl1	1469	0.000110585	0.000110449	6.24717e-05	0.000128932
Rps6ka5	132	2.91597e-05	2.88506e-05	1.40472e-05	0.000128765
1700028I16Rik	39	2.0573e-05	2.05262e-05	2.43013e-05	0.000128742
Dynlt1a	2099	0.000153893	0.000154692	0.000662902	0.000128718
Btbd17	202	4.5747e-05	4.55958e-05	3.43281e-05	0.000128703
Rhou	1853	0.000139152	0.000139149	9.59284e-05	0.000128569
Vps35	2140	0.000154205	0.000154457	0.000134719	0.000128487
Tmem59	481	8.10136e-05	8.10333e-05	8.03274e-05	0.00012828
Tmem181b-ps	2339	0.000164673	0.000164846	0.000120693	0.000128257
Phyhip	1434	0.00010904	0.000108643	4.95416e-05	0.000128198
Sumo1	2092	0.000152256	0.000152444	0.000130157	0.000128166
Riok3	2124	0.000147599	0.000147655	9.21192e-05	0.000128087
Supt4a	1258	9.62831e-05	9.61567e-05	5.05635e-05	0.000127943
Rab1b	3064	0.000210959	0.000212448	0.000524801	0.000127876
Stxbp5	2074	0.000152512	0.000152774	0.000125334	0.000127624
Rnf138	712	7.19634e-05	7.14095e-05	2.85349e-05	0.000127526
Polr2e	1104	9.14974e-05	9.11449e-05	3.79584e-05	0.000127237
Mtch2	2587	0.000179068	0.000179748	0.000212716	0.00012719
Erap1	1955	0.000141422	0.000141471	0.000103939	0.000127148
Rbm8a	2378	0.000164611	0.00016502	0.000152762	0.000126725
Rsph3b	929	8.57867e-05	8.54522e-05	9.00283e-05	0.000126635
Rprd1a	1147	0.000103402	0.000103128	6.63949e-05	0.00012661
Rrad	101	0.000107029	0.000107296	8.46461e-05	0.000126603
Leprot	2625	0.000180369	0.000181001	0.000196497	0.000126579
Cdc37	1036	0.000100212	9.99481e-05	6.74026e-05	0.000126539
Cdkn2d	332	4.21316e-05	4.17777e-05	1.91682e-05	0.000126448
Ccm2	1602	0.00012	0.000119571	5.45618e-05	0.000126443
Gm15663	992	9.11824e-05	9.07971e-05	4.87104e-05	0.000126366
Npm1	2397	0.000168756	0.000169285	0.000183225	0.000126117
Mir703	2149	0.00015587	0.000155977	0.000128019	0.000126115
Gdi2	2613	0.000180558	0.000181204	0.000214864	0.000125986
Enoph1	932	7.81478e-05	7.76756e-05	2.67981e-05	0.000125955
Insl6	101	0.000122662	0.000122688	7.72994e-05	0.000125766
Cabp1	1144	8.95404e-05	8.90087e-05	3.19496e-05	0.000125463
Arhgap36	61	4.4722e-05	4.49734e-05	5.04546e-05	0.000125287
Tcp11	621	6.52167e-05	6.48926e-05	3.23088e-05	0.000125281
Tarbp2	1122	9.63801e-05	9.63207e-05	6.13261e-05	0.000125261
Scarb1	1192	9.30771e-05	9.25094e-05	3.46635e-05	0.000125242
Sugt1	2737	0.000186997	0.000187906	0.000289016	0.000125176
Pfkp	1571	0.000120506	0.000120417	7.49563e-05	0.000125129
Tm7sf3	1915	0.000139545	0.000139432	8.88886e-05	0.000125112
Rhebl1	410	4.48589e-05	4.45248e-05	1.85777e-05	0.000125083
Mettl26	2048	0.000144292	0.000144289	9.63744e-05	0.000124997
St7l	218	4.41032e-05	4.38334e-05	2.45666e-05	0.00012498
Armcx3	2291	0.000167612	0.000168196	0.000254888	0.000124954
Cnot6l	2728	0.000191215	0.000192076	0.000350811	0.000124848
Efemp2	241	5.58878e-05	5.5548e-05	2.7724e-05	0.000124791
Drg1	754	8.08125e-05	8.07099e-05	4.66036e-05	0.000124675
Ybx1	2173	0.000158712	0.000159447	0.000260442	0.000124496
Pacs2	2075	0.000147532	0.000147847	0.000119764	0.000124448
Polr1d	2223	0.000157403	0.000157807	0.000233747	0.00012439
Celf4	1279	0.000117952	0.000118063	0.000110707	0.00012438
Ndufaf4	1571	0.000119518	0.000119774	9.93649e-05	0.000124244
Btg3	695	8.48706e-05	8.50491e-05	0.000318739	0.000123988
Cdc42se2	1114	9.47267e-05	9.44885e-05	4.61618e-05	0.00012398
Exosc9	797	6.7215e-05	6.66537e-05	2.1843e-05	0.000123868
Stk36	2086	0.000145572	0.000145508	8.1333e-05	0.00012381
Mrps33	1818	0.000131535	0.000131821	0.00012564	0.0001237
Tubb4a	655	6.56806e-05	6.5309e-05	2.79143e-05	0.000123674
Gpi1	2890	0.000197635	0.000198905	0.000385316	0.000123342
Txnl4a	2092	0.000153109	0.000153895	0.000261803	0.000123307
Coq2	2662	0.000183707	0.000184466	0.00024608	0.000123284
Mob3a	2252	0.000155355	0.00015559	0.000133343	0.000123204
Slc7a4	2734	0.000188257	0.000189032	0.000227757	0.000122964
Fam32a	1866	0.000135569	0.000136075	0.000150673	0.000122952
Dynlt1c	2112	0.000156634	0.000157486	0.000675464	0.00012273
Sumo3	2851	0.000194981	0.00019622	0.00044481	0.000122585
Ccl25	66	4.71253e-05	4.68944e-05	2.45008e-05	0.000122582
Tspan1	736	7.45023e-05	7.42488e-05	3.28835e-05	0.000122534
Arpc4	433	4.95597e-05	4.90958e-05	2.0609e-05	0.000122521
Psmb2	633	5.89281e-05	5.86812e-05	2.94441e-05	0.000122451
Dgat1	1877	0.000138204	0.000137989	7.68456e-05	0.000122448
Puf60	2883	0.000199733	0.000200869	0.000408159	0.000122433
Cep19	1633	0.000120021	0.000119562	5.26973e-05	0.000122394
Med29	1318	0.000103387	0.000103371	6.13705e-05	0.000122241
Psmc6	2247	0.00016004	0.000160513	0.000163732	0.000122219
Ubl7	2332	0.000163088	0.000163302	0.000125847	0.000122188
Zfp316	2065	0.000144308	0.000144293	8.72467e-05	0.000122109
Neu1	2746	0.000188805	0.000189898	0.000332082	0.000122039
Sec13	2528	0.000175666	0.000176138	0.000187331	0.000122024
Comt	1248	0.000106601	0.000106243	6.22346e-05	0.000122001
Rab25	1569	0.0001231	0.000123186	9.95487e-05	0.000121986
F11r	1654	0.000120549	0.000120242	5.86195e-05	0.000121627
Snap23	379	5.33618e-05	5.29499e-05	2.74055e-05	0.000121486
Ddx31	794	6.92915e-05	6.88551e-05	2.71292e-05	0.00012136
Actg1	2642	0.000182268	0.000183289	0.000321685	0.000121353
Mrpl47	877	7.73118e-05	7.69126e-05	2.87899e-05	0.000121164
Pttg1	897	7.5912e-05	7.57704e-05	3.71736e-05	0.000121153
Rap2a	1984	0.000148161	0.000148223	0.00011542	0.000121128
Pir	183	3.52595e-05	3.50617e-05	2.19862e-05	0.000121109
Gns	2197	0.000163073	0.000163757	0.000374638	0.000120999
Clns1a	2286	0.000161071	0.000161634	0.000172115	0.000120909
Gclc	1710	0.000128706	0.000129043	0.000150999	0.00012087
Nomo1	1094	9.71428e-05	9.67759e-05	4.97662e-05	0.000120838
2310061I04Rik	2007	0.000143809	0.000144084	0.000111925	0.00012079
Cdk4	2571	0.000177133	0.000177887	0.000243074	0.000120719
Dbndd2	2011	0.000148413	0.000148892	0.000152239	0.000120688
Prkag1	1112	9.43459e-05	9.40664e-05	4.87758e-05	0.0001206
Nubpl	988	8.61298e-05	8.57869e-05	3.96872e-05	0.000120551
Gm20716	1451	0.000108245	0.000107926	5.20054e-05	0.000120511
H2-Q10	1563	0.000117605	0.000117281	5.95586e-05	0.000120315
Grb2	2007	0.00014533	0.000145323	0.000101503	0.000120258
Nol7	2010	0.000144274	0.00014459	0.000137465	0.000120188
Sf3b6	1443	0.000110836	0.00011086	7.39683e-05	0.000120122
Emg1	2504	0.000171626	0.000172146	0.00016319	0.000120068
Sin3b	2223	0.00016116	0.000162032	0.000264527	0.000120055
Ctnnbl1	2006	0.000141634	0.000141706	9.93546e-05	0.00012003
Rpl9	1845	0.000143091	0.000143451	0.000219476	0.000120013
Rap1b	875	8.52719e-05	8.51246e-05	5.06933e-05	0.00011959
H3f3b	2845	0.000199966	0.000201081	0.0003539	0.000119583
Mtmr11	1849	0.000135692	0.000135504	7.74447e-05	0.000119552
Vps72	1255	9.8787e-05	9.83872e-05	4.25234e-05	0.000119504
2410131K14Rik	1227	9.33395e-05	9.28076e-05	3.48142e-05	0.000119471
Abhd17a	1116	9.75822e-05	9.72606e-05	5.02713e-05	0.000119303
Ubxn1	2454	0.000174069	0.000174866	0.000285929	0.000119168
Ufd1	1172	9.92678e-05	9.90448e-05	5.30611e-05	0.000118867
Rplp0	314	6.84456e-05	6.84717e-05	4.8665e-05	0.000118812
1110059E24Rik	2033	0.000143628	0.000143653	0.00010311	0.000118769
Ufsp1	685	6.5472e-05	6.51633e-05	2.50994e-05	0.000118722
Oaz1	1826	0.000142471	0.000142742	0.000381857	0.000118699
Bambi-ps1	119	2.79716e-05	2.77384e-05	1.45521e-05	0.000118571
Stt3b	2468	0.000173003	0.000173469	0.000181418	0.000118526
Endog	688	6.67095e-05	6.6405e-05	2.49275e-05	0.000118402
Aurkaip1	2633	0.000181254	0.000182126	0.000295334	0.000118398
Chpf2	2418	0.000164901	0.000165144	0.000118205	0.000118359
Dmrtc1a	1755	0.000126392	0.000126058	6.1222e-05	0.000118192
Rnps1	1999	0.00014407	0.000144066	0.000100091	0.000118167
Med11	777	8.56593e-05	8.54972e-05	8.06736e-05	0.000118154
Fgfr1op2	2639	0.000184123	0.00018484	0.00024773	0.000118142
Oaz1-ps	1973	0.000149202	0.00014956	0.0004079	0.000118069
Mkrn1	1976	0.00014204	0.000142006	9.01255e-05	0.000117982
Gm9457	1260	9.79261e-05	9.75279e-05	4.21704e-05	0.000117856
Commd4	1349	0.00011306	0.000112759	6.23469e-05	0.000117806
Nubp1	426	5.61977e-05	5.60753e-05	4.1198e-05	0.00011762
Vapa	1183	9.92786e-05	9.89708e-05	4.68883e-05	0.000117602
4933434E20Rik	2264	0.000158854	0.000159188	0.000160226	0.000117581
Pafah1b2	2399	0.00016836	0.000168803	0.000165643	0.00011749
Kpna2	2008	0.000140055	0.000140029	9.85823e-05	0.000117368
Tmem30a	2849	0.000201203	0.000202309	0.000410924	0.000117357
Prorsd1	103	4.90224e-05	4.89993e-05	2.89548e-05	0.000117163
Etf1	1913	0.000135499	0.000135504	9.41663e-05	0.00011694
Cxcr2	753	6.70504e-05	6.65161e-05	2.43119e-05	0.000116935
Shpk	1853	0.000131569	0.000131195	6.54812e-05	0.000116871
Gatad1	1651	0.000121857	0.000121616	7.59523e-05	0.000116775
Kcnk6	275	4.23361e-05	4.19666e-05	1.55354e-05	0.000116689
Ndufaf2	850	7.25525e-05	7.23548e-05	3.94296e-05	0.000116676
Gimap8	90	9.24516e-05	9.24887e-05	6.51523e-05	0.000116601
Arpc1a	2584	0.000181264	0.000181862	0.000212107	0.00011653
Scrn1	1247	9.84059e-05	9.79322e-05	4.16023e-05	0.00011646
Idh3b	2001	0.000139008	0.000138946	8.25377e-05	0.00011636
Serpinb1c	81	3.8934e-05	3.88572e-05	2.26689e-05	0.00011628
Ndufa9	1899	0.000136637	0.000136521	8.49897e-05	0.000116239
Mettl27	879	7.27445e-05	7.22838e-05	2.72699e-05	0.000116234
Prkrip1	1202	0.000101606	0.000101617	8.42907e-05	0.00011618
E030030I06Rik	2025	0.000143773	0.000143751	0.000107454	0.000116105
Atp5a1	2819	0.000196612	0.000197856	0.000453389	0.000115816
Ube2b	2975	0.000205044	0.000206213	0.000397698	0.000115641
Yae1d1	1432	0.000106006	0.00010578	5.17852e-05	0.00011561
Mrs2	2144	0.000149084	0.000149164	0.000106726	0.000115593
Rtn4	2673	0.000184651	0.000185462	0.000295296	0.000115527
Prelid3b	1272	9.83929e-05	9.78227e-05	3.94664e-05	0.00011547
Mvb12a	1036	8.73801e-05	8.69199e-05	3.68513e-05	0.000115434
Myom2	261	5.09974e-05	5.08773e-05	2.80173e-05	0.000115404
Itpa	780	7.35102e-05	7.30223e-05	3.04769e-05	0.000115397
Taf6	1900	0.0001385	0.000138768	0.000121627	0.000115386
Tmem192	1212	9.32322e-05	9.27204e-05	3.91826e-05	0.000115256
Sil1	574	7.37219e-05	7.37408e-05	5.51408e-05	0.000114964
Mtmr4	1270	9.49917e-05	9.46278e-05	3.74714e-05	0.00011494
Mrpl43	1248	9.70199e-05	9.69456e-05	5.9254e-05	0.000114827
Capn5	1487	0.000113636	0.000113255	5.50058e-05	0.000114817
Clint1	2542	0.000177696	0.00017839	0.000266265	0.000114764
Zyx	1135	8.8296e-05	8.78734e-05	3.4981e-05	0.00011472
Tubb4b	857	7.63389e-05	7.61047e-05	3.88993e-05	0.000114609
Gm833	86	7.12074e-05	7.10686e-05	4.957e-05	0.000114555
Chid1	260	7.32593e-05	7.33905e-05	6.47438e-05	0.000114553
Nans	912	7.70572e-05	7.6635e-05	2.82442e-05	0.000114418
Paip2	2684	0.000182874	0.000183676	0.000224098	0.000114361
Psme2	1254	0.000101797	0.000101884	7.97194e-05	0.000114341
Arl5b	1100	9.09179e-05	9.04786e-05	3.85513e-05	0.000114257
Oaz2	2181	0.000155527	0.000155715	0.000132661	0.000114247
Bcas2	2705	0.000186138	0.000187064	0.000353307	0.000114211
Gm6578	125	2.67368e-05	2.64487e-05	1.38088e-05	0.000113753
Sgms1	690	6.16945e-05	6.12071e-05	2.28558e-05	0.000113723
Fcf1	1545	0.000114896	0.000114878	7.33904e-05	0.000113703
Cct3	2242	0.000161263	0.000161601	0.00015782	0.000113638
Ppp6c	1736	0.000124219	0.000123994	7.27415e-05	0.000113588
Ccdc30	1141	9.6168e-05	9.57729e-05	4.43827e-05	0.000113555
Pmm1	486	5.92913e-05	5.91017e-05	3.46565e-05	0.000113548
Atp6v1g1	1607	0.000129845	0.000130454	0.000241561	0.000113456
Esyt2	2321	0.000163159	0.000163805	0.000202436	0.000113342
Ddhd1	799	8.06845e-05	8.03089e-05	4.10829e-05	0.000113317
Mrfap1	3171	0.000218707	0.000220608	0.000793637	0.000113256
Bbs5	1127	9.61446e-05	9.57802e-05	4.80994e-05	0.000112761
Pqbp1	2440	0.000167428	0.000168008	0.000177539	0.000112688
Sft2d1	1082	8.49692e-05	8.43988e-05	2.99195e-05	0.000112638
Rab5c	1191	9.81214e-05	9.79848e-05	5.74832e-05	0.00011257
Tmem212	73	4.14669e-05	4.13057e-05	1.88599e-05	0.000112461
Armt1	314	3.94716e-05	3.90259e-05	1.43782e-05	0.000112456
Trp53rka	1159	9.33962e-05	9.335e-05	5.79555e-05	0.000112434
Pnp2	79	6.83217e-05	6.82862e-05	3.798e-05	0.000112426
Asb1	1386	0.000105811	0.000105161	4.17638e-05	0.0001124
Higd2a	791	7.0202e-05	7.00916e-05	3.84945e-05	0.000112374
Gid8	1697	0.000128481	0.000128209	7.66064e-05	0.000112303
Prdx1	1660	0.000129757	0.000130255	0.000280622	0.000112278
Cldn4	1110	9.37132e-05	9.33293e-05	4.49907e-05	0.000112272
Magoh	1309	0.000102933	0.000102952	6.39198e-05	0.000112248
Klf9	2966	0.000206486	0.000207727	0.000426788	0.000112209
Saraf	926	9.17025e-05	9.17847e-05	0.000114274	0.000112167
Fdft1	1713	0.00012414	0.000124199	9.11374e-05	0.000111931
Hdgf	3008	0.000207878	0.00020931	0.000546712	0.000111751
Wdr12	2089	0.000151116	0.000151595	0.000150933	0.000111694
Acbd7	74	7.09868e-05	7.07428e-05	3.47759e-05	0.000111613
Stk40	1967	0.000137881	0.000137613	7.69017e-05	0.000111511
Aasdhppt	566	5.21783e-05	5.17374e-05	1.92804e-05	0.000111409
Cisd1	1904	0.000138059	0.000138368	0.00015179	0.000111395
Ikzf5	1981	0.00014389	0.000143871	9.91713e-05	0.000111387
Pcgf2	1281	0.000102921	0.000102477	4.93313e-05	0.000111346
Gpr68	430	5.84736e-05	5.81184e-05	2.99421e-05	0.000111325
Gtf2e2	801	7.81187e-05	7.78426e-05	3.71104e-05	0.000111165
Ubl4a	1252	0.000103772	0.000103619	6.13391e-05	0.000111163
Anxa6	2254	0.000168529	0.000169045	0.000244459	0.000111089
Scoc	1837	0.000129863	0.000129801	8.78306e-05	0.000111082
Ccnc	1992	0.000143225	0.000143108	9.1716e-05	0.000111051
Ndufs2	1045	9.43247e-05	9.41118e-05	6.02886e-05	0.000110977
Adam15	743	7.59072e-05	7.55712e-05	3.59409e-05	0.00011078
Zfpl1	1773	0.000123909	0.000123646	5.95262e-05	0.000110688
Prkcz	792	7.31191e-05	7.26724e-05	2.8801e-05	0.00011068
Nmnat2	155	2.99931e-05	2.96732e-05	1.43525e-05	0.000110643
Spast	2173	0.000150932	0.000150875	9.51145e-05	0.000110612
Glmp	2464	0.000170331	0.000170996	0.000218188	0.000110535
Zfp980	72	5.78913e-05	5.76676e-05	3.82164e-05	0.000110494
Plppr2	1532	0.000112793	0.000112309	5.09799e-05	0.000110456
Cdk2ap1	2188	0.000155823	0.000155955	0.000135659	0.000110438
Sike1	1708	0.000127262	0.000127482	0.000106663	0.000110433
Casc4	1628	0.000129245	0.000129166	9.99312e-05	0.000110395
1110065P20Rik	239	3.62858e-05	3.59935e-05	1.62722e-05	0.000110338
Pcdha1	422	4.31965e-05	4.26493e-05	1.45708e-05	0.000110329
U2af1	1879	0.000135857	0.00013586	8.62204e-05	0.000110254
Ankrd6	829	6.83547e-05	6.79266e-05	2.50063e-05	0.000110193
Gm10499	1771	0.000132394	0.00013263	0.000120128	0.000110093
Pja1	2233	0.000161317	0.000161696	0.000177406	0.000110061
Sdsl	1703	0.000120946	0.000120794	7.23402e-05	0.000109845
Ube2d2a	2803	0.000192681	0.000193806	0.000334991	0.000109648
Anapc5	2109	0.000151275	0.000151417	0.000127454	0.000109588
Dusp4	1014	8.70503e-05	8.68878e-05	5.07886e-05	0.000109509
Psma5	1766	0.000132254	0.000132606	0.000132386	0.000109414
Ak6	541	5.71887e-05	5.69275e-05	2.82953e-05	0.000109401
Tpm3	2879	0.000200878	0.000202119	0.000456862	0.000109351
Hunk	261	4.17039e-05	4.14353e-05	2.33554e-05	0.000109349
5031439G07Rik	88	3.50346e-05	3.49634e-05	2.78716e-05	0.000109341
Plod3	1559	0.000115617	0.000115154	5.27368e-05	0.000109201
Snf8	1205	9.79712e-05	9.80024e-05	6.65085e-05	0.000109162
Hnrnpab	2667	0.000189684	0.000190567	0.000377142	0.000109148
Tmem259	1900	0.00013493	0.000134659	7.81346e-05	0.000109141
Ppp2r2d	1516	0.000110175	0.000109687	4.75375e-05	0.000109102
Immp2l	766	8.40689e-05	8.36391e-05	4.55107e-05	0.00010909
Arxes1	162	4.68288e-05	4.65763e-05	2.5398e-05	0.000108734
Rars	2722	0.00018681	0.000187704	0.000236345	0.00010863
Gpr180	613	6.99796e-05	6.98996e-05	3.91753e-05	0.000108548
Ptprn	765	8.59975e-05	8.60421e-05	7.0622e-05	0.000108547
Cox10	2520	0.00017451	0.000174892	0.000153006	0.000108534
Vti1a	170	3.45653e-05	3.4381e-05	2.12354e-05	0.000108524
Mterf3	1952	0.000144242	0.000144505	0.000112382	0.000108472
Trak1	1067	0.000100249	9.99753e-05	6.50812e-05	0.000108374
Micu2	2278	0.000160475	0.000160599	0.000138479	0.000108368
Tmem30b	1299	9.58594e-05	9.52336e-05	3.37941e-05	0.000108298
Ffar2	968	8.03405e-05	7.97764e-05	2.97305e-05	0.000108256
Nfyc	1385	0.000103547	0.000102967	4.21548e-05	0.000108245
Zfp92	1959	0.000140968	0.000140817	9.43864e-05	0.000108161
Rnf11	3074	0.000211439	0.000213133	0.000629424	0.000107986
P4ha1	1407	0.00011861	0.000118519	9.30062e-05	0.000107851
Klf6	1813	0.000131557	0.000131472	8.50495e-05	0.000107803
Baiap2	1422	0.000107981	0.000107507	4.67652e-05	0.000107736
Acbd6	1442	0.000117259	0.000116974	6.75675e-05	0.000107557
Usp14	1925	0.000136415	0.000136214	8.1163e-05	0.000107534
Asah1	2738	0.000193659	0.000194859	0.000461961	0.000107322
Ociad1	2726	0.00018858	0.00018964	0.000417619	0.000107288
Lasp1	1845	0.000136019	0.000135883	8.55811e-05	0.000107189
Pxmp2	75	2.6673e-05	2.63925e-05	1.30449e-05	0.000107144
Lypla2	1532	0.000118714	0.000118458	7.088e-05	0.000107055
Umad1	1181	8.99854e-05	8.94296e-05	3.36913e-05	0.000106917
Nipa2	594	7.57838e-05	7.55633e-05	5.30072e-05	0.000106911
Wdr72	138	2.83234e-05	2.81021e-05	1.60686e-05	0.000106831
Ptges3	2876	0.000199722	0.00020107	0.000370334	0.000106678
Crb3	692	6.94398e-05	6.91284e-05	3.89235e-05	0.000106678
Tmbim1	2529	0.000174648	0.000175067	0.000183388	0.000106635
Cyp20a1	1051	8.13864e-05	8.07443e-05	2.7153e-05	0.000106615
Nudc	2422	0.000170444	0.000170772	0.000160283	0.000106546
Ap2m1	2396	0.000165509	0.000165983	0.000154797	0.000106513
Appbp2os	83	0.000112949	0.000112458	5.76031e-05	0.000106502
Cct7	2385	0.000163907	0.000164267	0.000147165	0.000106376
Zfp426	691	7.48831e-05	7.46826e-05	5.03649e-05	0.000106268
Rfk	1606	0.000126808	0.000126835	0.000112403	0.000106047
Rragd	2645	0.00018232	0.000183177	0.000273349	0.000106018
Phb	1962	0.00014522	0.000145761	0.000211567	0.000105937
Ebna1bp2	1716	0.000124577	0.000124267	6.64923e-05	0.000105918
Pgam5	352	5.21783e-05	5.17824e-05	2.69873e-05	0.000105871
Asna1	934	8.56355e-05	8.56682e-05	7.35268e-05	0.00010579
Fbxl4	1329	9.91734e-05	9.86025e-05	4.14777e-05	0.000105743
Elovl4	180	3.63121e-05	3.61124e-05	2.26141e-05	0.000105621
Flot1	2603	0.000178874	0.000179629	0.000250543	0.000105529
Arl2bp	1588	0.000119188	0.00011882	6.33434e-05	0.000105376
Prox2	433	4.48209e-05	4.42871e-05	1.57759e-05	0.000105306
Il1r2	83	6.79562e-05	6.78395e-05	3.73695e-05	0.000105109
Rasip1	138	3.46491e-05	3.45123e-05	2.36545e-05	0.000105107
Fstl3	1288	9.5426e-05	9.48247e-05	3.46552e-05	0.000105081
Sh3bgrl3	259	4.61593e-05	4.60975e-05	3.67043e-05	0.000105035
Eif3d	2297	0.00015784	0.000157961	0.000117399	0.000104992
Hint3	1325	0.000100027	9.97763e-05	5.34572e-05	0.000104978
Als2	129	2.58396e-05	2.57092e-05	1.62197e-05	0.000104519
Lman2l	915	7.46677e-05	7.41389e-05	2.82068e-05	0.000104493
Cyp2d22	615	5.66515e-05	5.61956e-05	2.27265e-05	0.000104038
Eif5	2899	0.000198039	0.000199235	0.000353239	0.000104038
Gnb1	2209	0.000158594	0.000158862	0.000137827	0.000104029
Atp6v1b2	3109	0.000216035	0.000217875	0.000756834	0.000104016
Sbds	2750	0.000191725	0.000192372	0.00022588	0.000104007
Sorl1	821	8.18021e-05	8.15241e-05	5.23751e-05	0.000103997
Sdf2	997	9.11316e-05	9.08181e-05	6.36955e-05	0.000103957
Dlgap1	56	4.38102e-05	4.37546e-05	3.56301e-05	0.000103883
Rab12	2528	0.000179748	0.000180547	0.000211956	0.000103877
Gspt1	1779	0.000127035	0.000126762	7.62907e-05	0.00010363
Myadml2	283	3.35816e-05	3.33183e-05	1.51831e-05	0.000103534
Rpgr	2060	0.000146649	0.000146444	8.82534e-05	0.000103408
Cacna1h	83	0.000103427	0.000103747	8.18712e-05	0.000103345
Golga7	2014	0.000143582	0.000143424	8.88557e-05	0.000103293
Pdzd3	580	6.1043e-05	6.05559e-05	2.39089e-05	0.000103248
Camk2n1	2805	0.000194296	0.000195274	0.000370349	0.0001032
Tfip11	1970	0.000139246	0.000139406	0.000106756	0.00010306
Ccng1	2517	0.00017601	0.000176664	0.000209143	0.000102967
Gm10767	383	4.87012e-05	4.84195e-05	2.49794e-05	0.000102839
Cnbp	2945	0.000206166	0.000207779	0.000557299	0.000102831
Zfp992	2364	0.000162805	0.000162915	0.000114454	0.000102812
Otub1	1999	0.000144906	0.000144754	9.20535e-05	0.00010281
Atpaf2	244	3.83707e-05	3.79856e-05	1.63114e-05	0.000102657
Tmem45b	85	6.29738e-05	6.32309e-05	5.14427e-05	0.000102604
Dync1h1	2085	0.000146132	0.000145988	8.93572e-05	0.000102578
2210016F16Rik	1479	0.000107232	0.000106851	5.16716e-05	0.000102462
Fbxw2	2035	0.00014131	0.000141319	8.25626e-05	0.000102225
Map2k4	1850	0.00012959	0.000129541	7.18573e-05	0.000102176
Ddx1	1590	0.000120039	0.0001198	6.52588e-05	0.000102148
Mcfd2	1268	0.000100806	0.000100534	5.09308e-05	0.000102138
Sptlc1	1723	0.000122191	0.000121919	6.64752e-05	0.000102088
Cotl1	2883	0.000199136	0.0002003	0.000355229	0.000102054
Ube2a	427	5.02271e-05	4.97941e-05	2.27122e-05	0.000101973
Ptms	2895	0.00020083	0.000201957	0.000373105	0.000101908
Dnajc10	2568	0.000181505	0.000182265	0.00024477	0.000101908
Alg1	820	7.60863e-05	7.58002e-05	4.95127e-05	0.000101829
Ptprk	319	3.90964e-05	3.86952e-05	1.34166e-05	0.000101697
Ica1	1907	0.000147497	0.000147739	0.000158737	0.000101691
Trappc6a	2254	0.000159644	0.000160175	0.00017196	0.000101651
Bgn	86	0.00010771	0.000107599	6.34531e-05	0.000101544
Bcl7b	1896	0.000141967	0.000141738	0.000102044	0.000101514
Asnsd1	1676	0.000121788	0.000121399	6.55341e-05	0.00010151
Dhrs7b	590	5.55085e-05	5.51635e-05	2.39412e-05	0.000101412
Naa15	1843	0.000129748	0.000129383	6.47302e-05	0.000101371
Ppp2cb	2923	0.000201225	0.000202466	0.000343794	0.000101347
Gm6710	1841	0.000138076	0.000138421	0.000127344	0.00010112
Eapp	1511	0.000110061	0.000109519	5.00181e-05	0.000101088
D630023F18Rik	90	7.71675e-05	7.71683e-05	6.23996e-05	0.000101069
Derl1	2772	0.000190625	0.000191692	0.000301011	0.000100976
Neu4	59	2.77813e-05	2.74948e-05	1.29538e-05	0.000100948
Cetn3	2503	0.000171721	0.000172355	0.00017533	0.000100918
Timmdc1	1339	0.00010118	0.000100805	4.9934e-05	0.000100867
Cfap36	1754	0.000125763	0.000125472	6.78896e-05	0.000100864
Trappc1	1679	0.000129427	0.000129781	0.000151981	0.000100801
Polr2c	1283	0.000102188	0.000101777	5.18593e-05	0.000100777
Mtdh	2083	0.000150663	0.000150742	0.00012891	0.000100774
Arhgef40	83	4.86267e-05	4.84704e-05	2.86845e-05	0.00010073
Oxa1l	2435	0.000172687	0.000173063	0.000173498	0.000100712
Gm10406	674	7.12331e-05	7.09659e-05	3.60871e-05	0.000100636
Sf3a1	2849	0.000200289	0.00020136	0.000333699	0.000100614
Cops3	2066	0.000142031	0.000141986	8.67913e-05	0.000100588
1810064F22Rik	65	2.99394e-05	2.97387e-05	2.10898e-05	0.000100561
Fam53a	695	6.06724e-05	6.0288e-05	2.40188e-05	0.000100529
Sypl	2143	0.000150214	0.000150345	0.000136018	0.000100508
Pgm3	1986	0.000143271	0.000143235	9.65103e-05	0.000100455
Mtch1	2800	0.000192976	0.000194074	0.000319916	0.000100411
B3gat3	1770	0.000129905	0.000129633	7.41343e-05	0.000100308
Cnot7	2690	0.000184688	0.000185288	0.000176438	0.000100149
Ddx18	1447	0.000109747	0.00010923	5.09695e-05	0.000100069
Zc3h14	2374	0.000163758	0.000164068	0.000134032	9.99803e-05
H2-T-ps	896	7.60807e-05	7.5581e-05	3.19528e-05	9.9956e-05
Dnph1	95	2.77859e-05	2.75863e-05	1.48359e-05	9.99508e-05
Zrsr2	2021	0.000144054	0.000144088	9.75283e-05	9.98932e-05
Cct4	2424	0.000168362	0.000168954	0.000186694	9.98776e-05
Chmp5	1483	0.000117043	0.000116895	8.65149e-05	9.98454e-05
Add1	2036	0.000145567	0.000145379	9.31175e-05	9.97453e-05
Cers2	2215	0.000154552	0.000154839	0.00016344	9.96518e-05
Ndrg1	2423	0.000169621	0.000170289	0.00023404	9.96119e-05
Fam89b	2493	0.00017198	0.000172339	0.000153475	9.96093e-05
St13	2269	0.00016427	0.000165022	0.000267039	9.95065e-05
4930413F20Rik	64	5.31185e-05	5.29011e-05	3.33307e-05	9.95016e-05
Slc22a23	1233	0.000103405	0.000103107	6.221e-05	9.94872e-05
Limd1	2594	0.000182296	0.000182815	0.000199013	9.94503e-05
Lpgat1	1697	0.000131971	0.000131781	9.43437e-05	9.94322e-05
Mipep	1734	0.000127163	0.000127135	8.23764e-05	9.93533e-05
Gstp1	1422	0.000112983	0.000113296	0.000467053	9.92865e-05
Emsy	1881	0.000139316	0.000139146	9.09721e-05	9.92697e-05
Mpv17	2191	0.000154279	0.00015451	0.000182957	9.89794e-05
Dnajb14	2796	0.000194781	0.000195746	0.000275888	9.89268e-05
Hspb8	1843	0.000135227	0.000135437	9.70263e-05	9.8919e-05
Srsf9	1829	0.000135327	0.000135136	9.19248e-05	9.8842e-05
Foxs1	69	8.85193e-05	8.85429e-05	5.81744e-05	9.88413e-05
Mogs	1011	8.42986e-05	8.38853e-05	3.63023e-05	9.86905e-05
Gimap6	84	0.000123827	0.000123988	0.000102716	9.86141e-05
Rab7	2956	0.000205626	0.00020711	0.000519826	9.84755e-05
Iqcb1	1678	0.000121336	0.000120891	6.0126e-05	9.84365e-05
Tmem121	290	4.60597e-05	4.56528e-05	2.07029e-05	9.83351e-05
Letm2	1074	8.53287e-05	8.48167e-05	3.53209e-05	9.82471e-05
Spire1	1357	0.000107118	0.000107018	6.24184e-05	9.81163e-05
Fam174b	2914	0.000201111	0.000202445	0.000454114	9.8054e-05
Lrba	493	8.34186e-05	8.32583e-05	6.22775e-05	9.79881e-05
Zfp706	2220	0.000153436	0.000153542	0.000130894	9.7972e-05
Ccdc137	109	4.77365e-05	4.7657e-05	3.07297e-05	9.78957e-05
St14	1464	0.00010827	0.000107669	4.5897e-05	9.78732e-05
Actb	1869	0.000138392	0.000138571	0.000116232	9.77991e-05
Myo1c	1598	0.000126886	0.00012683	0.00010345	9.76744e-05
Timm22	1876	0.000137027	0.000137198	9.63444e-05	9.75563e-05
Pin1	2043	0.000143815	0.000143982	0.000101331	9.7387e-05
Get4	2684	0.000187147	0.000187873	0.000240212	9.73857e-05
Slc25a1	2262	0.000158219	0.000158478	0.000127077	9.73402e-05
Tcf25	2730	0.000192546	0.000193444	0.000297627	9.71496e-05
B4galt6	2360	0.000166613	0.000166898	0.000142225	9.70782e-05
Syngr2	1374	0.000101557	0.000101046	4.30906e-05	9.70614e-05
Orc3	940	8.06568e-05	8.02142e-05	3.61406e-05	9.69782e-05
Gm5590	696	7.05203e-05	6.99566e-05	3.04897e-05	9.68392e-05
Ubxn6	2161	0.000153228	0.00015353	0.000147139	9.67881e-05
Ptprs	2331	0.000160759	0.000161053	0.000130925	9.67566e-05
Mapkapk5	910	8.75517e-05	8.72207e-05	4.97985e-05	9.67242e-05
Dach2	77	3.14057e-05	3.12507e-05	1.80316e-05	9.6624e-05
Tram1	976	9.88464e-05	9.8954e-05	0.000136213	9.65089e-05
Aprt	1112	9.62282e-05	9.62288e-05	9.14338e-05	9.64986e-05
Muc4	285	6.1411e-05	6.11323e-05	3.61578e-05	9.64754e-05
Ggt7	1646	0.000116444	0.000116051	5.47762e-05	9.63983e-05
Tomm20	2979	0.000206435	0.00020798	0.000488867	9.63961e-05
Gorasp2	1879	0.000141775	0.000142071	0.000194061	9.63946e-05
1600012H06Rik	1991	0.000144529	0.000144369	0.000102066	9.6344e-05
Tspan17	1328	0.000102641	0.000102328	5.11009e-05	9.63436e-05
Nckap1	2893	0.000204567	0.000205924	0.000418082	9.63372e-05
B4gat1	1849	0.000134947	0.000135169	0.000106082	9.63288e-05
Gm14391	1823	0.000132656	0.000132747	9.8972e-05	9.63081e-05
Spred3	269	5.68824e-05	5.67311e-05	3.94349e-05	9.61858e-05
Sv2a	1955	0.000139393	0.000139501	0.00010865	9.61442e-05
Maco1	2022	0.000150601	0.00015077	0.000151116	9.60891e-05
Mrpl28	1283	9.86494e-05	9.81619e-05	4.20505e-05	9.58892e-05
Cttn	2946	0.000203397	0.00020485	0.000425966	9.58025e-05
Syngr3	78	0.000119357	0.000119511	9.30121e-05	9.56371e-05
Wdr77	484	4.74224e-05	4.70428e-05	1.94005e-05	9.56155e-05
Coro1c	2165	0.00015707	0.000157337	0.000159556	9.5606e-05
Trak2	190	3.62332e-05	3.60469e-05	2.28144e-05	9.54254e-05
Sfxn1	1889	0.000146437	0.000146648	0.00016276	9.53835e-05
Pdrg1	1669	0.000116469	0.000115862	4.79083e-05	9.53705e-05
Nutf2	2009	0.000139526	0.000139332	7.90037e-05	9.53553e-05
Cbr1	2378	0.000166763	0.00016702	0.000131896	9.5345e-05
Eif2a	1593	0.000126506	0.000126335	8.98709e-05	9.50598e-05
Nudt22	401	4.05151e-05	4.01384e-05	1.61483e-05	9.50199e-05
1700064M15Rik	43	4.32439e-05	4.32368e-05	3.95888e-05	9.49894e-05
Dctn5	1037	9.08998e-05	9.05932e-05	4.69982e-05	9.49707e-05
Glo1	2515	0.00017505	0.00017579	0.000230488	9.4812e-05
Tmem179	1311	0.000106648	0.00010635	6.4089e-05	9.48078e-05
1110012L19Rik	1537	0.000115943	0.000116039	8.39138e-05	9.47958e-05
Nagpa	2062	0.000148713	0.000149097	0.000142018	9.46034e-05
Chchd10	933	8.96968e-05	8.94583e-05	5.36517e-05	9.44008e-05
Mtus2	44	3.40873e-05	3.39605e-05	2.22569e-05	9.42934e-05
Ubl3	2860	0.000203148	0.000204458	0.000456445	9.42897e-05
[truncated: 15,831 more rows]

## Sheet: Anxa10_neagtive_corellation
Supplemental Table 6. Gene network analysis of the correlation of Anxa10 with genes in pancreatic β cells from 6-week-old db/db mice.
Anxa10 negative correlated ranked genes in 6-wekk-old-db/db
Gene	Degree	PageRank w/o weight	PageRank w/ weight	Rarity	Personalized_Anxa10
Anxa10	87	6.76643e-05	6.75554e-05	3.75008e-05	0.15069
Ins2	2791	0.0024088	0.00248966	0.0292797	0.00441261
Fbxl7	1512	0.00101562	0.00103625	0.00142319	0.00353215
S1pr1	1527	0.00101199	0.00103432	0.0026809	0.00341829
4930547M16Rik	1720	0.00126018	0.0012745	0.000720424	0.00339723
Capn9	1044	0.000677656	0.000693692	0.00577535	0.00327805
Tbata	1022	0.000706568	0.000712568	0.000475492	0.00320772
Tcim	864	0.000573019	0.000583548	0.00110734	0.00317796
Zbtb32	1720	0.00130397	0.00132114	0.00114116	0.00316046
Paxx	839	0.000609688	0.000616854	0.000630666	0.00313871
Tshr	1040	0.000726433	0.000730462	0.000426215	0.00305982
Actn3	1002	0.000857059	0.000861276	0.000636757	0.00305911
Gm10390	976	0.000638222	0.00064517	0.000427731	0.00305374
2810030D12Rik	858	0.000554753	0.00056222	0.000445711	0.00304088
A330049N07Rik	846	0.000628033	0.000629982	0.00062344	0.00301507
D830026I12Rik	1058	0.000757877	0.000754029	0.000235996	0.00300826
Spem1	1300	0.000839144	0.000852542	0.000844435	0.00299856
Sh2d1a	1351	0.00093478	0.000938966	0.000448859	0.00296913
Slc2a3	1087	0.000734186	0.000736882	0.000339036	0.00295687
Gpr149	790	0.00051863	0.00052299	0.000333406	0.00292321
Sh2d5	666	0.000443749	0.000449171	0.000473143	0.00289871
Egfem1	1083	0.000679916	0.000688815	0.000612784	0.00288286
Gm19500	880	0.000578866	0.000583624	0.000367443	0.00284347
Cxcl9	760	0.000542162	0.000537478	0.000145703	0.00281093
Gm35715	626	0.000459005	0.000459732	0.000351403	0.00279118
Gm20758	967	0.000629067	0.0006308	0.000260861	0.00278201
Gm31615	905	0.000669388	0.000662003	0.000179008	0.00273051
Mucl2	457	0.000343817	0.000345746	0.000228848	0.00271351
Fcgr2b	700	0.000459614	0.000465293	0.000483736	0.00270378
Klk7	644	0.00045585	0.000458358	0.000316762	0.00269689
Kcnj16	884	0.000705682	0.000706388	0.00041429	0.00269544
Aifm3	405	0.00031229	0.000314045	0.000255495	0.00263879
Ciart	720	0.00045154	0.000456251	0.000286879	0.0026376
Thrsp	406	0.000337375	0.00033876	0.000338644	0.00262753
Gja4	457	0.000345793	0.000347914	0.000230328	0.00260182
Fam47e	401	0.000326076	0.000327915	0.000299763	0.00259498
1700086D15Rik	730	0.000485729	0.000481778	0.000120017	0.00256803
Hspa12a	458	0.000310149	0.000312109	0.000221264	0.00252684
Mir692-1	3487	0.00330104	0.00338102	0.00749489	0.00248423
Necab2	387	0.000286747	0.000287488	0.000185575	0.00246728
Sh2d1b1	517	0.000363887	0.000360937	0.000121424	0.00246248
Erp27	502	0.000346791	0.000344357	0.000109434	0.00245653
Klk1	497	0.000353281	0.000350004	0.000126049	0.00241128
Gm32220	409	0.000281404	0.000282057	0.000153751	0.00235765
Slc16a8	351	0.000265533	0.000265142	0.00014597	0.00235422
Mrln	438	0.000390863	0.000389054	0.000290777	0.00232761
Sycp3	365	0.000288677	0.000286996	0.000136818	0.00231706
Gm12925	288	0.000236104	0.000233801	0.00010393	0.0023094
Mir3470b	278	0.000193744	0.000191752	6.52355e-05	0.00228784
Ramp3	3051	0.00245828	0.00250931	0.00705039	0.00228289
Adora3	304	0.000209643	0.000209037	8.57877e-05	0.002249
Txnip	209	0.000163289	0.000162479	9.16583e-05	0.00224672
C8b	227	0.000193935	0.000194184	0.000152073	0.00222211
Gm45871	234	0.00022478	0.000224893	0.000201402	0.00221516
Onecut2	195	0.000173765	0.000173661	0.000152127	0.00216463
4930579K19Rik	3217	0.00280909	0.00286343	0.00505765	0.00215525
Ankrd55	1904	0.00141412	0.00143786	0.00153616	0.00214313
Mmp23	226	0.000206578	0.00020558	0.000123914	0.00210727
Hbq1b	168	0.000141256	0.000140205	7.77341e-05	0.00210683
Tex26	2095	0.00156063	0.0015894	0.00182387	0.002084
Fndc1	340	0.000250688	0.00024506	5.63739e-05	0.00206637
Plcb3	160	0.00013095	0.000128997	4.66307e-05	0.00202423
Sycp2	153	0.000118474	0.000116681	3.92294e-05	0.00202414
Ak8	305	0.00020456	0.000201825	6.27221e-05	0.00200466
Grpr	2592	0.00270965	0.00274215	0.00274153	0.00200384
Depdc1a	199	0.000149754	0.000146685	4.26414e-05	0.00199607
A430033K04Rik	188	0.000144147	0.00014305	5.75737e-05	0.00196277
Insrr	199	0.000170382	0.000170354	0.00011877	0.00195956
1700109H08Rik	2829	0.00226499	0.00229959	0.002565	0.00195166
Rarb	161	0.000131605	0.000129636	5.10308e-05	0.00193688
Scnn1b	182	0.000180746	0.000180296	0.000145445	0.00192274
Gm31036	269	0.000194584	0.000189838	4.64348e-05	0.00191762
Nrg2	171	0.000156571	0.000155627	9.32544e-05	0.00191539
Gm11592	144	0.000122408	0.000121166	5.73189e-05	0.0019085
Cd79a	165	0.000135792	0.000134616	7.78206e-05	0.00188552
Rasgrp2	2049	0.00142051	0.00145133	0.0076008	0.00187725
Oxr1	142	0.000160429	0.000160801	0.000135424	0.00187207
Tmem145	198	0.000140178	0.000138558	4.66494e-05	0.00186914
Chrnb1	163	0.000145308	0.000143684	7.2262e-05	0.00186484
Ecm2	186	0.000139474	0.000138777	7.13862e-05	0.00184971
Syde1	117	9.37376e-05	9.17644e-05	3.2452e-05	0.00183233
Aass	146	0.00013873	0.000138307	8.26218e-05	0.0018298
C130021I20Rik	1733	0.00113847	0.00116148	0.00220363	0.00182439
Enpp3	2422	0.00184396	0.00185803	0.00110476	0.00181501
Dpp6	101	0.000111445	0.000111939	0.000143468	0.00177605
Tex14	1984	0.00137644	0.00140065	0.00299169	0.00175747
Itpkc	84	8.14218e-05	8.08698e-05	4.96885e-05	0.00175716
Kcnk16	103	0.000121055	0.000119891	7.44317e-05	0.00175172
Gm26704	1453	0.000951155	0.000969393	0.0019377	0.00174892
Fhl4	84	7.82415e-05	7.75751e-05	4.02656e-05	0.00172576
Gm31497	80	7.78423e-05	7.69992e-05	3.74045e-05	0.0017191
Gm21885	82	6.85683e-05	6.70313e-05	2.21692e-05	0.00171551
Gm14204	60	5.91916e-05	5.81602e-05	2.85645e-05	0.00169858
Dkk4	2436	0.0017872	0.00181396	0.00244079	0.00168759
Gm34225	72	7.33826e-05	7.30981e-05	5.44218e-05	0.00168356
Ccdc93	68	7.53692e-05	7.51368e-05	6.85132e-05	0.00167877
Xrcc3	77	0.000109652	0.000109938	9.5826e-05	0.00167081
Mx2	5005	0.00716967	0.00731548	0.0122952	0.00166468
9230019H11Rik	1893	0.00128637	0.00130468	0.00123323	0.00166086
Uroc1	2513	0.00231648	0.00232535	0.0014884	0.00163079
Theg	1866	0.00137621	0.00139259	0.00111486	0.00162704
Tnfrsf1b	1923	0.00152222	0.0015232	0.000753991	0.00162469
Bnc2	63	6.00675e-05	5.91579e-05	2.65619e-05	0.0016229
Gm35333	90	7.13708e-05	6.96154e-05	2.24116e-05	0.00160444
Scd4	38	4.41513e-05	4.3596e-05	2.48053e-05	0.00160048
Gm10662	1323	0.00085619	0.000871049	0.00177899	0.001599
Pdlim3	1202	0.00077372	0.000783942	0.000595357	0.00159791
AW554918	43	4.46979e-05	4.4196e-05	2.16601e-05	0.00159718
Gm18409	1151	0.000736793	0.000749932	0.000961238	0.00155875
Cyp2s1	1407	0.00089395	0.000907141	0.000867471	0.00152631
Ces2e	1920	0.00136202	0.00137382	0.000896118	0.00152607
Tex11	2424	0.00204755	0.00205342	0.00123418	0.00147869
Nav3	766	0.000605493	0.000608921	0.00045337	0.00144727
Zfp473	1234	0.000800813	0.000802092	0.000247784	0.00140722
Sox30	1960	0.00170279	0.00169941	0.000948119	0.00135425
Ccl6	2906	0.00259527	0.00260761	0.00222348	0.00133405
Nexn	1562	0.00102512	0.00103793	0.00187113	0.00129442
BC055324	1602	0.00106133	0.00107664	0.00157038	0.00128865
Catsperg2	1348	0.000858151	0.000868175	0.000807761	0.00127663
Ngef	2482	0.00206321	0.002057	0.000961497	0.00125971
Gm11754	1487	0.000969475	0.000980312	0.000817271	0.00125459
Flt1	1187	0.000738517	0.00074545	0.000418552	0.00124836
Zfp341	1417	0.000926894	0.000929923	0.000635173	0.00122502
Ccbe1	1236	0.00101409	0.00101107	0.000478057	0.00121066
Gm11346	646	0.000452876	0.000454169	0.000286762	0.00117632
Clhc1	1171	0.000740154	0.000748384	0.000524171	0.00116391
6030466F02Rik	1925	0.00176724	0.00176289	0.00099794	0.00116044
Itih2	2368	0.00189004	0.00190402	0.00177559	0.00114949
Gm36486	702	0.000530502	0.000527758	0.000222097	0.00112085
Gm14015	1269	0.000815362	0.000816139	0.000328972	0.00110704
Gm26596	792	0.000497449	0.000497427	0.00018249	0.00110302
Jdp2	1117	0.000723858	0.000721193	0.00021151	0.00109872
Smad6	1344	0.000864583	0.000870491	0.000672051	0.00107686
Gm13201	3489	0.00354295	0.00359074	0.00606504	0.00106392
Gm26684	3157	0.00405634	0.00408129	0.00427684	0.00106018
Gm15722	612	0.000420907	0.000417583	0.00013607	0.00105462
Trank1	1165	0.000772186	0.000771407	0.000345999	0.0010463
Tlr4	1749	0.00123974	0.00125034	0.00175	0.0010309
Gm40438	729	0.000457244	0.000462185	0.000349731	0.00103042
Ins1	1944	0.00147424	0.00148945	0.00764643	0.00101789
Sh2b2	2317	0.00193635	0.00195416	0.00316105	0.000997434
Lama3	819	0.000507445	0.000507334	0.000166197	0.000991088
Tmem100	1091	0.000707751	0.000696387	0.000132957	0.000979541
Trim12a	944	0.00058976	0.000593039	0.000291358	0.000969106
Pakap	1183	0.000794695	0.000789498	0.000266573	0.000948239
Ajuba	963	0.000597546	0.00059956	0.000251817	0.000947937
Gm10371	834	0.000508298	0.000506951	0.000136427	0.000936132
Ano1	1080	0.000733992	0.00072396	0.000178449	0.000926722
Gm34307	2284	0.00240449	0.00238842	0.00129544	0.000912912
Mboat4	899	0.000581473	0.00057286	0.000106305	0.000908267
Ccl24	1167	0.000940452	0.000926942	0.000277142	0.000907278
Gm41031	511	0.000354472	0.000354852	0.000171977	0.000907188
Tph2	1485	0.00115794	0.00114141	0.000354249	0.000897732
Tcf7	1801	0.00145383	0.00144857	0.000733756	0.000893976
Gm30346	797	0.000495827	0.000499955	0.000486369	0.000887932
Satb2	1493	0.00117566	0.00115957	0.000379277	0.000884036
Cenpu	925	0.000590345	0.000591033	0.000263836	0.000876563
Gm14062	4434	0.00688749	0.00704081	0.0145246	0.000874665
Srpx2	1655	0.00252176	0.00251607	0.00184672	0.000867536
Tbx15	3100	0.00319609	0.00323926	0.00628818	0.000867148
Zdhhc22	379	0.000294266	0.000296164	0.000364235	0.000864331
4930563I02Rik	1007	0.000749932	0.000741553	0.000241435	0.000863538
Gm15337	3638	0.00416874	0.0042345	0.00728693	0.000862871
Ikzf1	825	0.000566074	0.000556965	0.000145152	0.000848742
Kif26a	338	0.000265219	0.000263038	0.000116144	0.000838726
Bmp4	1594	0.00117997	0.00117202	0.000468747	0.000826447
Cdc42ep1	2530	0.00286143	0.00287536	0.0027864	0.000818202
1700093K21Rik	3934	0.00515354	0.00525721	0.0101998	0.000814314
Tbc1d2b	887	0.000550373	0.000549106	0.000208631	0.000808331
4933432K03Rik	494	0.000333438	0.000334621	0.000273809	0.000803075
Gm12066	1862	0.00247554	0.00247493	0.00189161	0.000795541
Rin1	141	0.000110919	0.000111997	0.000115831	0.000789544
Slc2a6	314	0.000305863	0.000310798	0.000659076	0.000781073
Rgsl1	1145	0.000853478	0.000835275	0.000196568	0.000778356
Ccdc42os	669	0.000491995	0.000486467	0.000180473	0.000765386
Meig1	129	0.000102461	0.000103385	8.64539e-05	0.000760563
Rhox4a	395	0.000343682	0.000343526	0.00026051	0.000754616
AI504432	1038	0.000672718	0.00067716	0.00084713	0.000750498
Ska1	578	0.000367338	0.000364774	0.000112004	0.000746079
Ces2g	1161	0.000785703	0.000787175	0.000474795	0.00073856
Nid1	722	0.000463619	0.000458059	0.000134819	0.000726905
Tnks	348	0.000232112	0.000230197	7.05909e-05	0.000725247
Tmem189	250	0.000207354	0.000207287	0.000144023	0.00071976
Ephb6	285	0.000230625	0.000230328	0.000189159	0.000719242
BC048507	127	9.71959e-05	9.74439e-05	6.2623e-05	0.000708893
Gins2	929	0.000601626	0.000602731	0.000333609	0.000707142
Prss42	1414	0.00105074	0.00104409	0.000460773	0.000705728
Gm15151	143	0.000106918	0.000107825	0.000104976	0.00070108
Ankrd60	1329	0.00112524	0.00111291	0.000481644	0.000683441
Antxr2	321	0.000258626	0.000255768	0.000110893	0.000680563
Gm26705	748	0.000469888	0.00046785	0.00013745	0.000678108
Dnah8	803	0.000570702	0.000559758	0.000138816	0.000676764
Mir682	101	8.95269e-05	8.9701e-05	7.99701e-05	0.000672573
Nlrc3	134	0.000100078	0.000100818	8.16987e-05	0.000668268
Slc2a2	509	0.00032735	0.00032836	0.000373794	0.000667454
Lrrd1	490	0.000309123	0.00030487	6.5894e-05	0.000667409
Swi5	153	0.000109231	0.000109961	9.55558e-05	0.000662845
Gm6763	875	0.000564509	0.000558515	0.000146177	0.000660714
Gm16675	826	0.000555264	0.000549328	0.000180056	0.000657242
Tmigd3	107	9.23109e-05	9.26287e-05	7.94397e-05	0.000651694
Dysf	1673	0.00146944	0.00145597	0.000672047	0.000647853
Plekhg1	706	0.000451791	0.000445902	0.000132774	0.00064564
Sgo2a	1053	0.000698899	0.000697173	0.00029091	0.000643859
Ubl5	141	0.000103374	0.000104369	0.000115186	0.000642818
Tm6sf1	1348	0.00103036	0.0010288	0.000555774	0.000642102
Ngf	1448	0.00111968	0.00110891	0.000420549	0.000639728
Platr26	107	9.39324e-05	9.42615e-05	0.000109638	0.000639599
Robo3	1392	0.00107328	0.00107327	0.00077253	0.00063809
Accs	355	0.000232544	0.000229923	6.24814e-05	0.000634247
Gm32635	2470	0.00282564	0.00280887	0.00164027	0.000634127
Mt3	153	0.000113807	0.000115146	0.000265471	0.000626711
Gm1966	574	0.000349379	0.000346289	8.08594e-05	0.000624685
Spcs1	137	0.000114909	0.000116577	0.000168587	0.000622127
Gm5891	962	0.000659539	0.000661427	0.00147201	0.000621193
Phkg1	122	0.000155381	0.0001564	0.000189049	0.000620041
4930484H19Rik	702	0.000436587	0.000434042	0.000144173	0.000617179
Dynll1	126	9.04568e-05	9.08791e-05	6.0732e-05	0.000615899
Gm5860	810	0.000826057	0.000814684	0.000353933	0.00061533
Havcr2	3083	0.00373823	0.00379145	0.00595525	0.000614163
Spns2	550	0.000371205	0.000363078	7.48822e-05	0.000611593
Gm17634	119	8.98291e-05	8.98742e-05	5.11821e-05	0.00061106
Il20rb	637	0.000420586	0.000414546	0.000119775	0.000610123
Abracl	135	9.81764e-05	9.84528e-05	9.44179e-05	0.000606794
Rpl41	168	0.000116233	0.000117025	0.000436616	0.000606333
Snurf	149	0.000107156	0.000107749	8.55506e-05	0.000605281
Bc1	108	0.000105203	0.000106267	0.00014755	0.000605055
Sprr2a2	1042	0.000725694	0.000719339	0.000255703	0.000600724
Mfge8	141	0.000105673	0.000106447	8.32852e-05	0.000598115
Il17rd	117	9.14038e-05	9.15378e-05	5.46428e-05	0.00059552
Tlr8	2331	0.00249567	0.00249492	0.00183557	0.000595334
Itga5	382	0.000287217	0.00028825	0.000321814	0.000593019
Tmem208	149	0.000109665	0.000110798	0.000132682	0.000588508
Fgf10	895	0.000602027	0.000592691	0.000156001	0.0005875
Lgi4	610	0.000369746	0.000362932	6.15504e-05	0.000584198
Rhox4c	256	0.000231705	0.000231134	0.000178562	0.000583179
Mdk	87	8.72053e-05	8.69945e-05	6.75756e-05	0.000581346
Bmp8b	559	0.000510182	0.000503272	0.000185844	0.00058116
Ifi204	725	0.000535841	0.000528022	0.000155487	0.000577975
4930548J01Rik	1105	0.000768625	0.00076771	0.00047629	0.000576533
Snhg14	149	0.000104718	0.000105592	0.000102958	0.000570597
Arpp21	116	0.000117441	0.000117415	0.000102045	0.00056895
Gm30717	3066	0.00401695	0.0040605	0.0047951	0.000566299
Crybb1	149	0.000173237	0.000173909	0.000183087	0.000561974
3110099E03Rik	252	0.000172954	0.000169848	4.3267e-05	0.000561509
Nectin4	387	0.000348162	0.000345481	0.000204074	0.000560589
Uqcrh	151	0.000104488	0.000105203	0.000151588	0.000560226
Gm15423	479	0.000381317	0.00037645	0.000151993	0.000559815
Slfn5	143	0.000153405	0.000154732	0.000228915	0.000558228
Fanci	330	0.00028512	0.000282902	0.000137956	0.000556753
Ndufv3	157	0.000107704	0.000108911	0.000139079	0.000556682
Gm37065	112	8.64966e-05	8.66901e-05	0.000149447	0.000556456
Hbq1a	810	0.000530846	0.000527577	0.0002595	0.000550509
Gm31458	177	0.000118945	0.000119718	0.000511311	0.000546008
Fkbp11	129	0.000108768	0.000109635	9.59869e-05	0.00053956
Prrg3	1948	0.00201833	0.00201797	0.00140334	0.000538503
Tmsb10	159	0.000107087	0.00010792	0.000119367	0.000536687
Smim26	162	0.000112279	0.000112856	0.000113741	0.000534614
Atp5g1	166	0.000110634	0.000111423	0.00019644	0.000534135
St8sia5	126	0.000119036	0.000119874	0.000125642	0.000525199
Rps28	175	0.000116143	0.000117206	0.00147533	0.000523701
Pde5a	190	0.000212585	0.000213575	0.000235071	0.000523517
Il6st	217	0.000222545	0.000221102	0.000147051	0.000522529
Apobec1	142	0.000170703	0.00017111	0.000171018	0.00052131
Plac9b	2162	0.00237021	0.00236175	0.00144841	0.000520973
Tomm6	139	9.65161e-05	9.72256e-05	7.18924e-05	0.000517305
Gm5475	1172	0.000977442	0.000963553	0.000374233	0.000514932
Atp5l	145	9.82375e-05	9.8996e-05	7.27985e-05	0.000511373
Acot2	172	0.000163517	0.000162618	9.20556e-05	0.000510354
Krtcap2	167	0.000110887	0.000111414	0.000191252	0.000510263
Nrn1l	315	0.000202721	0.000200572	5.51046e-05	0.000509369
Yif1b	127	0.00010128	0.000101646	0.000101259	0.000508198
Ttyh1	124	0.000105127	0.000105365	7.38294e-05	0.00050816
Smim18	127	0.000135381	0.00013556	0.000101423	0.000507563
Gm16174	112	8.95513e-05	8.95711e-05	7.49092e-05	0.000506768
Nos1	89	8.15133e-05	8.08603e-05	4.95493e-05	0.000502796
Gm11337	2819	0.00417378	0.00421402	0.00486146	0.000502455
Cblb	193	0.000214932	0.000215749	0.000348706	0.000501564
Ppfia2	785	0.000864677	0.000862203	0.000677714	0.000500627
St3gal6	121	0.00010528	0.000106556	0.000132325	0.000500398
4933429O19Rik	1175	0.000897274	0.0008982	0.000756015	0.000499497
4732471J01Rik	1938	0.00293869	0.00293417	0.00236053	0.000496875
Ndst3	528	0.000328994	0.000327797	0.000137512	0.000495587
Gm14124	266	0.000209576	0.000206375	7.6884e-05	0.000494982
Fgf2os	1924	0.00190357	0.00191326	0.00248504	0.000494735
AI115009	1788	0.00267962	0.00267386	0.00212008	0.000492786
Ppp1r1c	2352	0.00269616	0.00269385	0.00182805	0.000490734
Gm16555	1749	0.00305642	0.0030717	0.00522869	0.000489484
Tmem160	164	0.000111742	0.0001125	0.00010828	0.000487513
Mas1	182	0.000119836	0.000120931	0.000675733	0.000486569
Dclre1c	152	0.000102259	0.000102729	9.36653e-05	0.00048548
Gm12056	417	0.000265274	0.000261981	7.249e-05	0.000483455
Pam16	155	0.000101658	0.000102241	0.000189818	0.000483225
Uqcr11	163	0.000106373	0.000107559	0.000280494	0.000479578
Lrrc17	100	0.000100123	0.000100429	8.55696e-05	0.000473797
Gab2	125	0.00011265	0.000113746	0.000257603	0.000473645
Dnaaf1	2766	0.00377156	0.00380542	0.00410685	0.000471011
Gmfg	109	8.73562e-05	8.75693e-05	8.97359e-05	0.000470967
Gm12338	151	0.000100272	0.000101172	8.34572e-05	0.000470738
Rnaset2b	149	0.000101789	0.000102458	0.000110745	0.000467548
Gm4710	700	0.000564413	0.00055336	0.000164711	0.000467201
Atp5mpl	123	8.65835e-05	8.68175e-05	5.21142e-05	0.000465497
Plaur	110	8.77829e-05	8.78312e-05	5.87028e-05	0.000464476
Adrb1	540	0.000348034	0.000345157	0.000187302	0.000464145
D130052B06Rik	369	0.000249231	0.000248039	0.000113249	0.000461458
Flicr	895	0.000621748	0.000620957	0.000455443	0.000461437
Gm34583	119	0.000104238	0.000104556	0.00010217	0.000460922
Cdh13	86	7.74539e-05	7.71254e-05	4.53569e-05	0.000460105
Gsdma3	103	0.000110078	0.000110023	0.000100008	0.000459375
4930529C04Rik	792	0.000604876	0.000601106	0.000267237	0.000459208
Rpl39	144	9.46152e-05	9.55699e-05	8.35332e-05	0.000458742
Dnajc4	154	0.000106347	0.000106575	0.000114785	0.000458568
Srp9	179	0.000125389	0.00012607	0.000160073	0.00045825
A830035O19Rik	382	0.00025609	0.000253203	9.44877e-05	0.000456654
Rnaset2a	150	0.000103333	0.000103871	0.000106521	0.00045509
Iapp	139	0.000166703	0.000167197	0.000307468	0.00045506
Uox	2565	0.00332634	0.00331738	0.00210941	0.000454068
Polr2l	145	0.000101771	0.000102625	8.51566e-05	0.000451003
Lyve1	108	0.000106266	0.000106086	8.43608e-05	0.000450986
Ost4	164	0.000105939	0.00010688	0.000258189	0.000450339
Ang	88	7.48946e-05	7.47956e-05	5.3703e-05	0.000449299
Gm35595	650	0.00044646	0.000440451	0.000143061	0.000449115
Ccdc138	285	0.000233305	0.00023019	8.44467e-05	0.000448485
Cnpy2	157	0.000106088	0.000106662	0.000130847	0.000445682
Rpl22l1	132	9.63295e-05	9.69615e-05	8.09271e-05	0.000443957
Gm20498	144	0.000124726	0.000125644	0.00014848	0.000443246
Snrpn	151	0.000103015	0.000103903	9.4661e-05	0.000441862
Rhox4a2	215	0.000208117	0.000206766	0.000120719	0.000441788
Lsm1	114	8.35117e-05	8.38667e-05	5.25369e-05	0.00044112
Trim34a	610	0.00038446	0.000379319	0.000101171	0.000439969
Abca4	125	0.000148056	0.00014836	0.000134724	0.000439808
2010204K13Rik	148	0.000200222	0.000202472	0.00168261	0.000439705
Lxn	145	9.63023e-05	9.6585e-05	7.63667e-05	0.000439628
Atp5e	160	0.000104634	0.000105801	0.000132748	0.000437432
Ier3ip1	182	0.000124505	0.000125906	0.000372122	0.000436448
Atp5k	139	9.288e-05	9.3287e-05	6.70699e-05	0.000435772
1110008P14Rik	128	9.46588e-05	9.51204e-05	7.47292e-05	0.000435689
Bfsp1	231	0.000210762	0.000209886	0.000134003	0.000434416
Gm5099	567	0.000361952	0.000359946	0.000140906	0.000433929
Kcnj10	351	0.000224241	0.000219554	4.42062e-05	0.000433227
1700064M15Rik	107	0.000105737	0.000106316	9.35518e-05	0.000430556
Garnl3	780	0.000534285	0.000523308	0.000124975	0.000429712
Tmbim4	165	0.000113067	0.000113677	9.73431e-05	0.000429202
Pllp	2659	0.00396739	0.00400645	0.00461579	0.000428992
Cd52	245	0.000213114	0.000209556	7.94769e-05	0.000428636
Pbld1	127	8.67232e-05	8.6861e-05	5.30948e-05	0.000427954
4933440J02Rik	234	0.000221892	0.000221127	0.000174587	0.000427374
Prkd3	366	0.000254299	0.000254449	0.000184508	0.000424962
Rps29	194	0.000130373	0.000132121	0.00060401	0.000423255
AW551984	100	8.63335e-05	8.67697e-05	8.78729e-05	0.000421184
Nab2	117	9.45754e-05	9.48871e-05	0.000101558	0.000420022
Pou3f2	2315	0.00380408	0.00381299	0.00345164	0.00041799
Psg26	112	9.76589e-05	9.7946e-05	9.78821e-05	0.000413996
Gm9949	92	7.88495e-05	7.87677e-05	5.04204e-05	0.000413605
Nol12	153	0.000101403	0.000101867	7.86692e-05	0.000413128
Thoc6	115	0.000189752	0.000190339	0.000222921	0.000408443
Dad1	151	0.000108576	0.000109088	9.09271e-05	0.000408426
Vcpkmt	114	8.01965e-05	8.01827e-05	4.41758e-05	0.000408193
Aff2	111	8.6474e-05	8.65297e-05	7.61885e-05	0.000406822
Kcnk10	1075	0.00122446	0.00121314	0.000688917	0.000406337
1500009L16Rik	110	8.53222e-05	8.56193e-05	6.20138e-05	0.000406226
Cox16	143	9.55531e-05	9.60138e-05	6.94701e-05	0.000406162
Fgfr3	611	0.00065141	0.000645975	0.000353492	0.00040603
Ptchd1	411	0.000653199	0.000648231	0.000447534	0.000405208
Ly6d	1174	0.000983614	0.000977097	0.000495387	0.000403965
Gsdma	95	7.81886e-05	7.84295e-05	7.7102e-05	0.000401814
Gm16150	78	5.91811e-05	5.87144e-05	2.64907e-05	0.000401015
Vkorc1	170	0.000117833	0.000118877	0.00016111	0.000400856
Selenom	158	0.000103553	0.000104752	0.000109082	0.000400488
Cux2	160	0.000192042	0.00019361	0.000191219	0.000399981
Prkg1	127	0.00011054	0.000109016	4.83547e-05	0.000398791
Gm34799	167	0.000148843	0.000147785	9.75439e-05	0.00039832
Tatdn1	111	8.08091e-05	8.05783e-05	5.67696e-05	0.000398247
Cox7c	150	9.79114e-05	9.92327e-05	0.000104447	0.000398147
Tmem72	219	0.00016259	0.00015924	5.32119e-05	0.000396769
Pde6a	195	0.000315121	0.000317337	0.000349976	0.000396244
Tnfrsf12a	119	8.5185e-05	8.55568e-05	5.76249e-05	0.000395014
Plut	245	0.000183351	0.000183437	0.000175731	0.000393217
Derl3	269	0.000385537	0.000384991	0.000346676	0.000392937
Ace	612	0.000395429	0.000392543	0.000172899	0.00039081
4933440M02Rik	167	0.000142582	0.000140721	6.15115e-05	0.000390507
Mrpl57	154	9.98203e-05	0.000100674	0.000118517	0.000390234
Nme1	135	8.9214e-05	8.99204e-05	6.95442e-05	0.000389701
Gm38699	107	7.41035e-05	7.39781e-05	3.56912e-05	0.00038766
Tomm7	154	9.94816e-05	0.000100343	9.68603e-05	0.000387615
Arhgap36	115	0.000112481	0.000113175	0.00011098	0.000386753
Cacna1g	497	0.000319542	0.000313978	8.36565e-05	0.000385696
Dusp6	114	8.28916e-05	8.30938e-05	4.87935e-05	0.000385125
Pet100	114	8.64997e-05	8.69069e-05	7.74028e-05	0.000384402
Cox6b1	111	7.81613e-05	7.79625e-05	3.95857e-05	0.000383918
Crisp2	186	0.000362822	0.000367936	0.000603595	0.000382517
Ndufc1	176	0.000116008	0.00011724	0.000190145	0.000382507
Sfxn5	127	0.000116134	0.000115147	7.31167e-05	0.000382174
Pola2	88	0.000166426	0.000167199	0.000193777	0.000381504
Gpbar1	92	8.23267e-05	8.16901e-05	4.63867e-05	0.000381254
A930038B10Rik	96	7.84308e-05	7.84119e-05	5.50426e-05	0.000380982
Gpr45	710	0.000592147	0.000578952	0.000192242	0.000379905
Thyn1	59	5.5202e-05	5.46531e-05	2.65114e-05	0.000376428
Rapsn	2250	0.00322226	0.00321076	0.0021518	0.000376023
Gm14305	55	4.56632e-05	4.53261e-05	2.15076e-05	0.000375869
B020004C17Rik	84	6.20632e-05	6.15965e-05	2.76386e-05	0.000373236
Vgf	147	9.7209e-05	9.7952e-05	7.61268e-05	0.000372738
Gm16364	180	0.000154884	0.000152026	5.8657e-05	0.000371798
Nop10	136	9.17527e-05	9.19494e-05	6.91299e-05	0.000370131
Pde7b	127	0.00012177	0.000120177	5.2784e-05	0.000369544
BC016579	300	0.000182693	0.00017828	2.97463e-05	0.000369121
Ndufc2	147	0.000119372	0.000119827	9.40348e-05	0.000368912
Tcte2	98	8.11174e-05	8.08957e-05	5.27919e-05	0.000368777
2210408F21Rik	96	7.45892e-05	7.42184e-05	4.13617e-05	0.00036836
Samsn1	158	0.000154271	0.000152786	8.5402e-05	0.000367009
Dpm3	163	0.000115194	0.000116154	0.000112429	0.000366782
Ndufa4	115	8.01411e-05	8.03855e-05	6.10679e-05	0.00036264
4930502E09Rik	603	0.000468833	0.000458009	0.000126811	0.000362594
Spry2	103	7.32278e-05	7.33686e-05	4.022e-05	0.000361264
Mall	738	0.000521473	0.00051772	0.000235395	0.000359231
Btnl2	162	0.000133048	0.000131411	6.05646e-05	0.000359036
Ptrhd1	121	8.33504e-05	8.34054e-05	5.19063e-05	0.000358999
Lepr	93	7.28243e-05	7.28722e-05	4.00481e-05	0.000358304
Isoc2b	115	8.80221e-05	8.80529e-05	6.04521e-05	0.000357834
Fstl5	149	0.000109701	0.000108133	3.44737e-05	0.000355996
Cd164l2	125	8.5182e-05	8.53272e-05	4.49256e-05	0.000355856
Ocel1	74	7.58369e-05	7.53104e-05	8.48952e-05	0.000352939
Nid2	73	7.83266e-05	7.81566e-05	5.77705e-05	0.000352123
Gm16357	58	5.92107e-05	5.87872e-05	3.22696e-05	0.000351381
Tmem258	156	0.000101504	0.000102271	0.000104241	0.000351056
Ager	2069	0.00277725	0.00275639	0.00149384	0.000350729
Th	115	8.59426e-05	8.58893e-05	4.94597e-05	0.00035046
1700001G17Rik	390	0.000244122	0.000239441	5.94775e-05	0.000349867
Vma21	163	0.000104444	0.000105741	0.000186531	0.000349839
Irak3	104	8.62451e-05	8.61719e-05	5.05673e-05	0.000349446
Gm30198	102	7.89701e-05	7.905e-05	4.87196e-05	0.000348782
Npff	180	0.000215699	0.000216535	0.000204247	0.000347985
4930429P21Rik	1507	0.00152467	0.00152194	0.00109243	0.000347946
Bdh2	97	7.83059e-05	7.78955e-05	5.0965e-05	0.000347922
Ccdc113	75	6.48479e-05	6.4415e-05	3.54899e-05	0.000347574
Dyrk4	1867	0.00223843	0.00222965	0.0013155	0.000344865
Ccdc142	60	5.8904e-05	5.84726e-05	3.85363e-05	0.000344587
Mrpl53	142	9.6141e-05	9.69828e-05	7.40366e-05	0.000343646
Cgref1	164	0.000105944	0.000106814	0.000112107	0.000343641
Tmem204	687	0.000507991	0.000496715	0.000140517	0.000343587
Tmem255a	115	0.000139864	0.000140189	0.000242145	0.000341842
Tma7	183	0.000114695	0.000116388	0.000250785	0.000341758
Fkbp1b	162	0.000210376	0.000212857	0.0016668	0.000338516
Pter	66	5.04245e-05	4.99301e-05	2.12095e-05	0.000335923
Ndufb11	178	0.000112778	0.000113624	0.000125428	0.000335383
Gm8942	155	9.9762e-05	0.00010071	9.74323e-05	0.000334168
Slc35b1	195	0.000123304	0.000124851	0.000270051	0.000333014
Gm40518	339	0.000295257	0.000289653	0.0001218	0.0003328
Ndufb5	168	0.000107811	0.000109204	0.000132115	0.000329125
Slc37a4	119	0.000137383	0.000137703	0.000124517	0.000328301
Tm4sf20	106	8.90316e-05	8.92849e-05	8.84275e-05	0.000328131
Uqcrh-ps1	158	0.000101807	0.000102354	0.000103665	0.000327879
Syngr3	87	9.73761e-05	9.69426e-05	6.41685e-05	0.000327879
Ssu2	379	0.000237851	0.000234147	6.06811e-05	0.000327842
Scnn1g	152	0.000123452	0.000122488	6.25443e-05	0.00032775
Tubg2	64	5.87049e-05	5.83169e-05	3.24993e-05	0.000327717
Ssr4	152	0.00013577	0.000136244	0.000111508	0.000327644
4930455G09Rik	65	6.4595e-05	6.40808e-05	3.61045e-05	0.000326335
Cd63	129	8.67185e-05	8.7486e-05	0.000106865	0.000325197
Cox6c	144	9.41697e-05	9.52064e-05	7.64724e-05	0.000323771
4833411C07Rik	340	0.000256486	0.000250744	7.31307e-05	0.000323663
Ppp1r14a	367	0.000233531	0.000229475	5.69804e-05	0.000323524
Gm5566	128	8.46004e-05	8.54464e-05	6.74075e-05	0.000323232
Uqcrb	65	5.77484e-05	5.74155e-05	2.96809e-05	0.000323191
Terc	895	0.000722645	0.000722905	0.00059331	0.000322804
Acsbg1	99	7.41921e-05	7.40532e-05	4.08649e-05	0.00032261
4930519L02Rik	343	0.000223186	0.000221598	0.000102116	0.000322246
Spc24	116	8.1963e-05	8.19948e-05	4.68875e-05	0.000321492
P3h3	72	5.8578e-05	5.80055e-05	2.7269e-05	0.000320765
Uqcrq	118	8.03528e-05	8.04625e-05	6.12781e-05	0.000319618
Gm16342	79	5.92523e-05	5.88021e-05	2.60746e-05	0.000319456
Sec61b	153	9.82384e-05	9.92731e-05	0.000181935	0.000318546
Atoh8	484	0.000309359	0.000306033	0.00010919	0.000316336
Gm40309	71	0.000117006	0.000117086	0.000116262	0.00031587
0610038B21Rik	889	0.000707067	0.000703661	0.000387238	0.00031488
Gm5767	443	0.00029423	0.000288935	7.55037e-05	0.000314035
Ndufa1	141	0.000146066	0.000146888	0.00014763	0.000313756
Fxyd5	98	7.53113e-05	7.503e-05	4.99655e-05	0.000313528
Fkbp2	182	0.000117057	0.000118264	0.000134624	0.000313298
Atpif1	170	0.000108336	0.000109478	0.00012454	0.000312997
Tmprss6	229	0.000173607	0.00017104	6.35512e-05	0.000312966
Prdm14	288	0.000185047	0.000183166	7.14028e-05	0.000312935
Alg5	183	0.000136796	0.000137715	0.000177864	0.000312638
Rabac1	208	0.000130864	0.000132644	0.000194008	0.000312477
Ros1	125	9.89182e-05	9.94607e-05	0.000161371	0.000310258
Arl1	85	6.29441e-05	6.26139e-05	2.99846e-05	0.000309605
Dlgap1	83	7.87234e-05	7.85869e-05	6.98299e-05	0.000309292
Zranb3	90	0.000134633	0.000134836	0.00012871	0.000309156
Rab32	51	5.78966e-05	5.75458e-05	3.84432e-05	0.00030889
C330002G04Rik	77	7.4959e-05	7.46062e-05	4.50337e-05	0.000308873
Capsl	132	8.87031e-05	8.92208e-05	0.000103341	0.000307987
Gm41625	240	0.000162554	0.00016052	5.6044e-05	0.000307929
Gm6961	588	0.000509901	0.000498796	0.000161459	0.000307617
Arxes2	152	0.000100869	0.000101474	0.00012199	0.000307289
Serpina1b	129	9.02317e-05	9.08262e-05	7.54804e-05	0.00030727
Cox6a1	109	7.5002e-05	7.51151e-05	4.86908e-05	0.000307201
Gm15421	142	9.77013e-05	9.82656e-05	8.32302e-05	0.000306911
Rasa4	751	0.000945839	0.000941624	0.000759438	0.000306828
Polg2	516	0.000643634	0.000631086	0.000287615	0.000306565
Ppl	63	0.000112574	0.000112569	9.82504e-05	0.000305654
Nme2	136	8.87767e-05	8.95611e-05	7.38102e-05	0.000304388
Pde8b	101	8.60965e-05	8.63693e-05	0.000107721	0.000303743
Sec61g	131	8.58318e-05	8.65616e-05	7.03333e-05	0.000303529
Pla2g1b	561	0.000483527	0.000477008	0.000210737	0.000303443
Tgm3	168	0.000149549	0.000149956	0.000120384	0.000303042
Gm12693	151	9.95794e-05	0.000100429	0.00011121	0.000302542
Gm13710	1049	0.000990532	0.000991625	0.000833935	0.000302367
Kdm2b	76	6.43088e-05	6.40617e-05	4.49631e-05	0.000302263
Shc3	92	6.90222e-05	6.89041e-05	3.78072e-05	0.000301772
Cdh3	146	9.31743e-05	9.4018e-05	6.68081e-05	0.000301065
1700066J03Rik	1527	0.0019969	0.00197923	0.00109886	0.000300682
Rmdn2	90	6.54542e-05	6.50008e-05	2.82939e-05	0.000299734
Zfa-ps	98	0.00011385	0.000113304	7.7008e-05	0.000299495
Eng	477	0.000309579	0.000306375	0.000106403	0.000299465
Gstm5	207	0.000131995	0.000133335	0.000236223	0.000298843
Ccl25	79	6.4211e-05	6.38882e-05	3.08205e-05	0.000298684
Rps25	158	0.000100822	0.000101951	0.000101183	0.000298323
Adarb1	93	9.16005e-05	9.11442e-05	6.21256e-05	0.000297692
Gm31819	90	9.51522e-05	9.40283e-05	5.14226e-05	0.000297571
Vpreb1	77	6.52554e-05	6.4865e-05	3.47008e-05	0.000297501
Gmds	162	0.000107454	0.000108522	0.00010834	0.000296777
Trat1	262	0.000164988	0.000162194	4.03488e-05	0.000295809
Acbd7	78	6.5149e-05	6.47567e-05	3.75164e-05	0.000295491
Sra1	164	0.000102882	0.00010399	9.98287e-05	0.000295438
4833422C13Rik	79	5.6237e-05	5.57885e-05	3.09182e-05	0.000294716
A230083G16Rik	139	0.000119912	0.000118154	4.76412e-05	0.000294044
Smyd4	137	9.1566e-05	9.21232e-05	6.86635e-05	0.000293466
Ergic1	179	0.000111823	0.00011307	0.000209075	0.000293258
Ndufa13	131	8.60875e-05	8.69061e-05	0.000114539	0.000293088
Nat8f1	156	0.000109789	0.000110516	7.97058e-05	0.000292841
Grhl3	313	0.000214625	0.000210126	5.50909e-05	0.000291323
Snrnp35	93	8.44977e-05	8.47955e-05	7.73296e-05	0.000290196
Tmem176b	177	0.000110711	0.000112394	0.000145992	0.000289927
Nenf	159	0.000102574	0.000103702	0.000292076	0.000289355
Rpl35	156	9.95923e-05	0.000100886	0.000123449	0.000288586
Emc7	150	9.70937e-05	9.81998e-05	8.56772e-05	0.000287805
Gm10698	127	8.72601e-05	8.71488e-05	5.12414e-05	0.000287797
Gm6988	170	0.000106918	0.000108364	0.000160185	0.000285925
Gnptg	175	0.000111921	0.000113219	0.000131991	0.000285627
Trpv1	70	5.82333e-05	5.80608e-05	3.90172e-05	0.000285513
Cracr2a	100	0.000126504	0.000126719	0.000109748	0.000285054
Sp3os	110	7.66368e-05	7.69256e-05	5.39113e-05	0.000284063
Gm36503	419	0.000278637	0.00027435	8.59307e-05	0.000283623
Dennd2a	581	0.000644608	0.000637607	0.000359098	0.000283068
Gm4651	1151	0.00121812	0.00120361	0.00055599	0.000282932
Adcy5	394	0.000261116	0.000258552	0.000136175	0.000282844
Gm30262	388	0.000240937	0.000235898	4.63775e-05	0.000282044
Faiml	43	4.60513e-05	4.55223e-05	2.54248e-05	0.000281633
Tmem229b	133	0.000133068	0.000133129	8.80745e-05	0.000281419
Grik4	146	0.000159809	0.000159375	0.00013057	0.000281413
Hcfc1r1	141	9.34001e-05	9.40473e-05	8.09451e-05	0.000280211
Aqp3	71	5.92464e-05	5.94223e-05	6.76498e-05	0.000280009
Creb3l4	140	0.000189157	0.000188015	0.000127089	0.000279991
Mafa	453	0.000296058	0.000293558	0.00014819	0.000279917
Fcer1g	669	0.000529742	0.000521927	0.000188442	0.000279643
Cops9	155	9.89121e-05	9.99873e-05	0.000111856	0.000279525
Vpreb2	64	6.25821e-05	6.22447e-05	3.99671e-05	0.000279061
S100a3	106	7.47184e-05	7.45934e-05	3.74526e-05	0.000278855
Crlf1	91	0.000103391	0.000103186	9.55851e-05	0.000278421
Gm21586	141	0.000251512	0.000252409	0.000271434	0.000278122
Krt7	121	8.42244e-05	8.43525e-05	4.31224e-05	0.000277944
Malsu1	166	0.000107004	0.000107922	7.14916e-05	0.000277681
Ulk4	75	9.43279e-05	9.39775e-05	7.2693e-05	0.000277662
Gm17756	145	9.3437e-05	9.41723e-05	6.99711e-05	0.000277526
Ankrd29	67	6.30406e-05	6.24258e-05	3.45727e-05	0.0002775
Snx15	122	8.36839e-05	8.37846e-05	9.7224e-05	0.000277367
Il1r2	100	8.71056e-05	8.61753e-05	4.06557e-05	0.000277164
Tmed3	146	9.96517e-05	0.000100546	8.17142e-05	0.000277094
Rps17	192	0.000119249	0.00012089	0.000255707	0.000276852
Matn2	83	0.000100286	0.000100144	0.000105405	0.000276822
Csn3	78	6.09953e-05	6.06119e-05	3.05565e-05	0.000276333
Zfp600	65	5.44603e-05	5.40352e-05	2.92754e-05	0.000276008
Mydgf	141	9.13387e-05	9.27867e-05	9.8666e-05	0.000275918
Gm2225	146	9.40304e-05	9.52465e-05	9.53549e-05	0.000275901
Gm12915	87	7.39299e-05	7.34132e-05	3.98577e-05	0.000275672
Rps12	173	0.000111091	0.000112523	0.000149693	0.000275643
Stmn2	371	0.000232961	0.000229822	6.47182e-05	0.000275121
Hsbp1l1	144	9.25597e-05	9.28107e-05	4.72643e-05	0.000274117
Gm14634	57	6.50809e-05	6.49496e-05	6.71337e-05	0.000273358
Acta1	124	8.4769e-05	8.50008e-05	6.65643e-05	0.000272995
Gm20511	772	0.000650111	0.000637244	0.000212792	0.000272554
Atp6v1c2	65	6.72436e-05	6.66129e-05	4.07644e-05	0.000272443
Cox14	94	6.6585e-05	6.65942e-05	4.21883e-05	0.000272095
Tas1r2	83	8.20814e-05	8.18752e-05	5.01604e-05	0.000271758
Cyp2b23	162	0.000151776	0.000148895	4.9592e-05	0.000271545
Bloc1s6	108	7.90949e-05	7.90965e-05	6.22551e-05	0.000271456
Cadm1	127	8.31925e-05	8.36838e-05	6.1078e-05	0.000271309
Pcsk5	511	0.00034524	0.000340552	0.00012755	0.000271295
Smdt1	163	0.000102973	0.000104179	0.000112411	0.000271049
Reep5	178	0.000110992	0.00011279	0.000274047	0.000271012
Snx22	137	0.000299408	0.000301907	0.000520751	0.000270706
Qpct	66	6.17395e-05	6.1418e-05	4.02019e-05	0.000269457
Trappc2l	111	7.73003e-05	7.75734e-05	0.000259886	0.000269185
Tnfrsf23	113	7.91832e-05	7.91328e-05	4.18403e-05	0.000269094
Rexo2	137	8.88322e-05	8.93993e-05	5.85376e-05	0.000268174
D830032E09Rik	81	0.000104674	0.000105165	0.000117671	0.000267932
Anapc13	157	0.000100221	0.000101154	8.7976e-05	0.000267339
Gm36283	386	0.000249161	0.000243595	5.30131e-05	0.000267024
Tmem98	145	9.3184e-05	9.48296e-05	0.000204151	0.000266942
Rnf152	89	6.53459e-05	6.51769e-05	3.19419e-05	0.000264956
Msr1	529	0.000460839	0.000449596	0.000137045	0.000264365
Gm6654	173	0.000108737	0.000109946	0.000165697	0.000264254
Tuba4a	116	8.01241e-05	8.06586e-05	4.9943e-05	0.000264
Dennd4b	102	9.4568e-05	9.31779e-05	5.19885e-05	0.000263945
St8sia1	116	0.000145202	0.000143993	9.09758e-05	0.000263606
Car9	135	9.77528e-05	9.5089e-05	2.50051e-05	0.000263481
Gm4997	177	0.000110191	0.00011172	0.000308682	0.000263049
Haus1	98	6.94151e-05	6.92233e-05	3.23762e-05	0.000262455
Rpl37a	145	9.30848e-05	9.41421e-05	8.89816e-05	0.000261872
Ntn1	135	0.00021146	0.000210785	0.000173913	0.000261518
Igsf10	170	0.000129199	0.000127561	5.03614e-05	0.000261456
Trnp1	141	9.48111e-05	9.51995e-05	9.4877e-05	0.000261426
Plp2	123	9.03815e-05	9.09679e-05	0.000276878	0.000260762
Rimklb	66	5.26785e-05	5.23304e-05	2.38874e-05	0.00026074
Stx19	74	7.87254e-05	7.87978e-05	5.5086e-05	0.000260476
Slco2b1	68	8.46684e-05	8.44299e-05	5.77298e-05	0.000260306
Ropn1l	135	8.83253e-05	8.85934e-05	5.14825e-05	0.000259454
Hecw2	106	7.71548e-05	7.74739e-05	4.91299e-05	0.000259261
Bsg	196	0.000121499	0.000123394	0.000408329	0.000259169
Bex2	132	8.5975e-05	8.69524e-05	6.65004e-05	0.000259058
Acer2	169	0.000106668	0.000107614	9.44473e-05	0.000258948
Rwdd1	154	9.87038e-05	0.000100004	0.000121555	0.000258919
Rnasek	132	8.7898e-05	8.84803e-05	5.15142e-05	0.00025888
Ndufa2	134	8.69404e-05	8.76695e-05	5.97082e-05	0.000258876
Ncf4	1727	0.00314965	0.0031675	0.00336763	0.000258852
Fmnl3	42	4.94445e-05	4.92698e-05	3.77872e-05	0.000258499
Apod	1498	0.00189307	0.00189448	0.00165841	0.000258166
Dkk2	61	6.11364e-05	6.06529e-05	3.48548e-05	0.000257823
Lipo3	173	0.000107711	0.000108597	0.000100635	0.000257211
Morn2	123	8.03455e-05	8.05929e-05	4.71856e-05	0.000257099
Slc2a1	88	0.000124268	0.000124596	0.000141213	0.000256276
Spa17	66	5.27399e-05	5.24616e-05	2.59195e-05	0.000256196
Miox	48	5.86571e-05	5.84897e-05	4.48951e-05	0.000256127
Gtpbp8	61	4.61371e-05	4.56192e-05	2.01645e-05	0.000255957
4930479H17Rik	195	0.000231494	0.000229093	0.000121955	0.000255474
Pecam1	97	0.000118421	0.000118755	0.000111756	0.000254881
Naa38	137	8.87258e-05	8.90771e-05	4.80837e-05	0.000254798
Susd4	133	8.67734e-05	8.76029e-05	6.96506e-05	0.000254674
5730412P04Rik	134	8.77429e-05	8.78702e-05	5.17038e-05	0.000254575
Gm14586	191	0.000119395	0.000121195	0.000265438	0.000254059
D330050G23Rik	102	7.97386e-05	7.91524e-05	3.93913e-05	0.0002539
Gm7285	185	0.000114953	0.000116884	0.000360872	0.000252957
Krt27	96	7.71864e-05	7.73451e-05	6.47382e-05	0.000252655
Gm38293	186	0.000130749	0.000129318	5.87849e-05	0.000252589
Rpl34-ps1	168	0.000106192	0.000107511	0.000168405	0.000252568
Suv39h2	97	7.46539e-05	7.48445e-05	0.000141839	0.000252051
Gtf2a1l	199	0.00035296	0.000354493	0.000365562	0.000251618
Gm32352	75	9.74405e-05	9.75795e-05	0.000108407	0.00025113
Serpinb1a	72	5.81577e-05	5.7904e-05	3.36712e-05	0.00025098
Sri	143	9.29349e-05	9.40221e-05	0.000101113	0.000250939
Ptprcap	402	0.000263252	0.00026083	0.000132585	0.000250891
Gimap6	65	7.12757e-05	7.12203e-05	5.53738e-05	0.000250749
Gm6402	205	0.000127827	0.00012977	0.000359289	0.000250736
Acot12	63	6.93497e-05	7.00555e-05	7.86046e-05	0.000250733
Jcad	89	8.04116e-05	7.92967e-05	3.22714e-05	0.000250727
Gm30784	185	0.000405289	0.000407805	0.000490993	0.000250608
Rpl38	142	9.11036e-05	9.20838e-05	7.45921e-05	0.000250077
2310039H08Rik	70	5.80419e-05	5.75073e-05	2.75226e-05	0.000249712
Flrt2	96	0.000109051	0.000108671	8.33986e-05	0.000249228
Pomc	161	0.000119992	0.000119953	8.90619e-05	0.000249127
C130074G19Rik	115	7.9863e-05	7.97894e-05	3.95811e-05	0.000248963
Gm13213	135	8.94242e-05	9.03118e-05	7.74837e-05	0.00024876
Uba52	154	9.85908e-05	9.97528e-05	0.000128691	0.000248602
Tusc3	179	0.000112227	0.00011356	0.000217174	0.000248437
Catip	104	7.59505e-05	7.60521e-05	5.56284e-05	0.000248357
Gm45928	127	8.16678e-05	8.24514e-05	5.72936e-05	0.000248184
Jpt1	115	7.80414e-05	7.83808e-05	3.86825e-05	0.000247975
Fam81a	88	7.53949e-05	7.50369e-05	4.59881e-05	0.000247797
Rpl32	150	9.52429e-05	9.63699e-05	8.61876e-05	0.000247272
Sat2	102	7.68379e-05	7.64849e-05	5.16851e-05	0.000246989
Zfp286os	117	0.000166171	0.000167251	0.000212727	0.000246907
Plxnc1	289	0.000182041	0.000178914	4.19438e-05	0.000246563
3110082I17Rik	148	9.48537e-05	9.54924e-05	6.03615e-05	0.000246563
Rps24	135	8.91979e-05	8.99208e-05	8.21927e-05	0.000245948
Rnls	77	6.92067e-05	6.88894e-05	4.11841e-05	0.000245161
Tmem212	79	6.03881e-05	6.0006e-05	2.6528e-05	0.000244962
Ap3s1	160	0.000100217	0.000101521	0.000137323	0.000244925
Dck	203	0.000381571	0.000383962	0.000476322	0.000244841
Wnt10a	97	7.47443e-05	7.48593e-05	4.34222e-05	0.000243872
Agpat4	105	7.88843e-05	7.91566e-05	0.000528056	0.000243842
Abhd1	47	4.39666e-05	4.36309e-05	2.41125e-05	0.000243581
Angpt1	1408	0.00193591	0.00194679	0.00227772	0.000243385
Rgs4	111	7.60625e-05	7.63742e-05	4.4722e-05	0.000243237
Upk3a	67	8.42034e-05	8.3638e-05	5.95071e-05	0.000242835
Ramp2	100	7.17021e-05	7.17156e-05	5.14206e-05	0.000242625
1810034E14Rik	103	0.000132363	0.000132208	0.0001557	0.000242485
Ceacam1	72	5.88478e-05	5.84577e-05	2.7442e-05	0.000242464
Rrad	77	7.26611e-05	7.26465e-05	5.21221e-05	0.000242313
Clec18a	98	0.000151591	0.000152714	0.0002072	0.000241845
Rbpms2	249	0.000224243	0.000220567	8.16115e-05	0.000241675
Ms4a15	112	0.00015347	0.000153667	0.000149279	0.000241568
Ndufa3	152	9.76167e-05	9.83397e-05	7.57665e-05	0.000241027
Gm10548	129	8.71277e-05	8.74698e-05	8.03385e-05	0.000240909
Tm2d1	170	0.000108076	0.000109077	0.000110745	0.000240245
Nbdy	69	5.29118e-05	5.2586e-05	3.03668e-05	0.000240192
Atraid	181	0.000113033	0.000114355	0.000154797	0.000239682
Zfp536	96	7.13796e-05	6.98827e-05	2.13508e-05	0.000239655
Rps16	182	0.000113871	0.000115252	0.000195681	0.000239062
Mkx	110	0.000149804	0.000148849	0.000102073	0.000238447
Gdap2	109	0.000130949	0.000131839	0.000149898	0.000238142
Tmem45b	105	8.39752e-05	8.3951e-05	7.69161e-05	0.000238128
Adgrf2	238	0.000200836	0.000197618	7.47501e-05	0.000237694
Pabpn1l	70	9.20032e-05	9.21832e-05	8.64044e-05	0.000237102
4933427D06Rik	137	0.000144337	0.000143235	8.22377e-05	0.000237024
Wwtr1	113	0.000118634	0.000116056	4.72572e-05	0.000236304
Tigit	123	0.000103895	0.000101972	3.96132e-05	0.000235726
Prorsd1	142	9.60342e-05	9.63571e-05	6.75752e-05	0.000235544
Apoa2	84	9.04307e-05	9.09558e-05	7.4836e-05	0.000234946
Pla2g4b	57	5.58826e-05	5.54519e-05	3.19393e-05	0.000234646
Efcab10	147	0.000102706	0.000102909	7.13446e-05	0.000234519
Krtap28-13	53	4.91862e-05	4.88659e-05	2.83917e-05	0.000234237
Cnbd2	113	7.6248e-05	7.69343e-05	0.000109294	0.000234218
2610027F03Rik	1121	0.00119313	0.00119597	0.00119352	0.000234139
Arpc3	133	8.81569e-05	8.93251e-05	9.73563e-05	0.000234111
Mapk11	108	8.87297e-05	8.89119e-05	0.000107983	0.000232213
Rps15a-ps5	175	0.000110179	0.000111728	0.000207735	0.000232146
Mcm4	167	0.000121133	0.000119395	4.22044e-05	0.000232125
Sorcs1	82	6.57342e-05	6.54728e-05	3.82433e-05	0.000232024
Mpig6b	194	0.000220142	0.000219007	0.000165108	0.00023163
Gm15232	255	0.00016573	0.000162987	5.05013e-05	0.000231067
Cox7a2	108	7.54378e-05	7.56159e-05	4.57808e-05	0.000230891
Hopx	139	8.96506e-05	9.05426e-05	0.000168887	0.000230555
Cavin2	475	0.000333598	0.000329047	0.000117583	0.000230431
Znrd1	197	0.000134952	0.000136422	0.000174043	0.000230356
Tnk2	80	9.58093e-05	9.56132e-05	8.38868e-05	0.000230281
Gm36315	88	0.00011127	0.000111876	0.000125868	0.000230179
Pnp2	70	6.22579e-05	6.17952e-05	3.71788e-05	0.000228793
Nap1l2	48	5.31379e-05	5.30321e-05	3.59081e-05	0.000228777
Bgn	65	6.80087e-05	6.75396e-05	4.16862e-05	0.000227805
Mien1	124	8.29732e-05	8.35056e-05	5.5037e-05	0.000227758
Rps18	157	0.000101247	0.000102454	0.000144394	0.00022761
Rps15a-ps6	166	0.000104471	0.000106067	0.000255621	0.000227336
Exoc6	110	7.66965e-05	7.68653e-05	4.63886e-05	0.000227218
Dcbld1	115	7.74127e-05	7.72193e-05	3.58113e-05	0.000226186
Gm33696	344	0.000232323	0.000227107	5.34531e-05	0.000224878
Cfap77	60	7.08164e-05	7.08393e-05	5.55521e-05	0.000224571
Gm4473	92	8.29529e-05	8.12505e-05	3.32846e-05	0.000223731
Rps26	151	9.63411e-05	9.74494e-05	0.000100097	0.000223584
Eny2	91	6.26786e-05	6.26184e-05	2.83753e-05	0.000223326
Naxe	157	0.00010146	0.000102797	0.000175521	0.000223027
Spink10	114	0.0001641	0.000163194	0.000110967	0.00022277
Pla2g12a	170	0.000107282	0.000108282	0.000182607	0.000222229
Rgs16	94	0.000114303	0.000114489	0.000152053	0.000222053
Cisd3	113	7.56197e-05	7.59023e-05	3.50821e-05	0.000221886
Rpl29	141	9.25882e-05	9.37851e-05	0.000145488	0.000220964
Gm16553	117	0.000141583	0.000141623	0.000117445	0.000220821
Skint3	51	5.21868e-05	5.16047e-05	2.69787e-05	0.000220482
Sec11c	144	0.000146375	0.000147675	0.000158452	0.000220453
Tmem128	141	9.18004e-05	9.2932e-05	0.000105252	0.000220027
Rpl34	160	0.00010174	0.000103238	0.00021446	0.000220012
Rps20	177	0.000110182	0.000111853	0.0002806	0.000219838
Tmem176a	201	0.000123981	0.000126711	0.000378778	0.00021975
Gm30093	63	6.66815e-05	6.57683e-05	3.25036e-05	0.000219534
Npdc1	149	9.58151e-05	9.72161e-05	0.000276282	0.000219322
Tmed10	189	0.000117295	0.000119469	0.000283022	0.000219234
Cux1	139	9.2768e-05	9.35637e-05	0.000119982	0.000219151
Gm11517	140	9.15724e-05	9.25975e-05	0.00012194	0.000218389
Gimap8	75	7.18913e-05	7.1607e-05	4.69821e-05	0.000217994
Gm8623	174	0.000108857	0.000110649	0.00026344	0.000217906
Rps14	157	9.85074e-05	9.98216e-05	9.74931e-05	0.000217647
Tecr	159	0.000100993	0.000102868	0.000134718	0.000217562
Mmgt2	179	0.000112415	0.000113681	0.000159278	0.00021715
Rab6b	113	0.000160585	0.000162403	0.000234207	0.000216954
Gm37336	341	0.000256576	0.000252957	9.51291e-05	0.000216718
Myo7b	78	6.93752e-05	6.92031e-05	5.58209e-05	0.000216616
Bco1	153	0.000101091	0.000101873	0.000149699	0.000216213
Gm29376	144	9.4456e-05	9.55707e-05	0.000140709	0.000215947
Mrnip	50	4.89165e-05	4.83172e-05	2.54985e-05	0.000215628
Gm36757	82	6.0707e-05	6.04632e-05	3.67318e-05	0.000215067
Gjd3	105	7.34118e-05	7.1179e-05	1.62132e-05	0.000214544
Ndufa12	128	8.39532e-05	8.43125e-05	4.96177e-05	0.000214488
Rpl37	160	0.000101474	0.000102839	0.000322788	0.000214428
Rabl2	107	7.51169e-05	7.48795e-05	3.36922e-05	0.000214091
Il13ra1	173	0.000109292	0.000110077	0.000191569	0.000213847
Ly6c2	753	0.000648259	0.000645432	0.000334686	0.000213805
Gm10416	761	0.000846051	0.000827285	0.000333073	0.000213316
Rps21	177	0.000110412	0.000112107	0.000327112	0.000212901
Slirp	92	6.51853e-05	6.48983e-05	3.1097e-05	0.000211834
Mycbp	193	0.00012872	0.000130443	0.00011494	0.000211832
Gm38405	138	0.000220828	0.000222735	0.000313688	0.000211532
Tspan7	190	0.000117748	0.000119796	0.000265219	0.00021123
Lhfp	61	7.32962e-05	7.33686e-05	7.85643e-05	0.00021104
S100a10	86	6.59337e-05	6.56637e-05	9.07126e-05	0.000210769
Rps7	176	0.000110575	0.000112275	0.000268076	0.000210554
Cox8a	145	9.38949e-05	9.51418e-05	0.000114285	0.00021053
Rpl32l	129	8.43875e-05	8.52003e-05	6.23386e-05	0.000210302
Rpl31-ps12	168	0.000105558	0.000107054	0.000432989	0.000210238
Icam2	788	0.000857225	0.000840601	0.000351096	0.000210217
Gm20005	73	7.20555e-05	7.10617e-05	3.63218e-05	0.000210211
Gm6109	166	0.000104381	0.000105931	0.000163708	0.000209691
2810049E08Rik	1102	0.00170947	0.00168947	0.0010553	0.00020965
Ptprc	45	5.16886e-05	5.13456e-05	3.12998e-05	0.000209564
Ndufb8	133	8.74965e-05	8.85597e-05	0.00022742	0.000209549
Lgr6	67	6.89923e-05	6.85846e-05	4.966e-05	0.000209337
Rps13-ps4	194	0.000120486	0.00012262	0.000363986	0.000208953
Atp5j2	139	8.96538e-05	9.07479e-05	7.93854e-05	0.000208505
Camk1	200	0.00012542	0.000127555	0.000296618	0.000208489
Gm16599	987	0.00107364	0.00107282	0.000890714	0.00020815
Gm6252	173	0.000109652	0.00011133	0.000282322	0.000208075
Polr2f	96	7.20126e-05	7.17943e-05	5.38187e-05	0.000207896
Rpl37rt	157	0.000100411	0.000101688	0.000214026	0.000207702
Gm26777	99	7.14342e-05	7.17622e-05	4.51237e-05	0.000207641
Gm6525	150	9.73155e-05	9.83333e-05	0.000100023	0.000207555
Prkar1a	97	6.86894e-05	6.85081e-05	3.39222e-05	0.000207519
Uhrf1	176	0.000220102	0.000219768	0.000200796	0.000207267
Mylk2	257	0.000193809	0.000189199	5.31478e-05	0.000207185
Tmem252	80	6.13222e-05	6.1007e-05	3.0341e-05	0.000207101
Tlr5	66	8.06399e-05	8.00893e-05	5.91953e-05	0.000206612
Smim4	194	0.000133147	0.000134734	0.000136695	0.000206043
Zfp980	53	4.80766e-05	4.75246e-05	2.40867e-05	0.000205778
Hsd3b7	187	0.000116455	0.000118278	0.000236283	0.000205577
Rps19	140	9.06207e-05	9.1597e-05	8.12998e-05	0.000204738
Rps13	186	0.000115719	0.000117716	0.000348191	0.000204381
Arhgdig	126	8.48709e-05	8.56997e-05	0.000184078	0.000204347
Rab7b	75	8.4407e-05	8.4156e-05	5.38598e-05	0.000204024
Znhit1	90	7.07546e-05	7.04417e-05	5.02848e-05	0.000203964
Naxd	178	0.000111357	0.000112833	0.000151988	0.000203835
Ifnar2	164	0.000103393	0.000104439	0.000237872	0.000203432
Eomes	186	0.000124859	0.000122526	3.39748e-05	0.000203281
Hist1h2br	193	0.000120715	0.00012256	0.000437128	0.000203203
Tmed6	198	0.000128427	0.000129164	0.000110028	0.000202964
Gabra5	101	0.00011262	0.000112107	7.37578e-05	0.000202851
Plod2	97	9.66702e-05	9.52646e-05	4.67046e-05	0.000202831
Gm7429	137	9.00742e-05	9.09808e-05	9.09285e-05	0.000202794
Gm29508	54	5.1372e-05	5.12815e-05	3.48409e-05	0.000202486
Gm8580	125	8.68479e-05	8.74391e-05	0.000428008	0.000202462
Pbdc1	86	6.03834e-05	6.03333e-05	3.46685e-05	0.000202224
Rpn2	173	0.000108805	0.000110223	0.000377147	0.000202022
Lamtor2	110	7.48281e-05	7.52472e-05	8.19458e-05	0.0002019
Bcan	191	0.000139037	0.000139589	0.000137774	0.000201486
Gm2573	140	9.08609e-05	9.15485e-05	6.13821e-05	0.000201397
Tspyl3	142	0.000108227	0.000106466	4.32701e-05	0.000201223
1810064F22Rik	72	5.26719e-05	5.22499e-05	1.98049e-05	0.000201072
Bud31	148	9.41869e-05	9.53642e-05	8.18921e-05	0.000200998
Gm32461	87	5.82354e-05	5.77968e-05	2.29779e-05	0.000200714
Cdnf	41	6.35866e-05	6.29105e-05	4.05714e-05	0.000200542
Spink13	54	8.60222e-05	8.53566e-05	5.84e-05	0.00020045
Eef1b2	180	0.000112626	0.000114406	0.000389557	0.000200214
Cavin3	141	8.93205e-05	8.94723e-05	8.18932e-05	0.000200178
Tspan13	161	0.000101067	0.000102656	0.000120423	0.000200107
Acsm2	81	9.69015e-05	9.603e-05	6.08694e-05	0.000199991
Gprc5a	105	7.8315e-05	7.79866e-05	3.89176e-05	0.000199962
Mir8112	78	0.000122661	0.000121747	7.65237e-05	0.000199152
Gm833	74	6.44385e-05	6.43833e-05	4.30117e-05	0.000198194
Gm15772	146	9.46054e-05	9.5909e-05	0.000104817	0.000197653
Timm17a	111	7.48718e-05	7.56629e-05	9.77009e-05	0.000197559
H2al1g	83	6.45105e-05	6.28822e-05	1.93314e-05	0.000197228
Hikeshi	187	0.000116744	0.000118204	0.000239847	0.000196627
Gm40493	76	6.74656e-05	6.73925e-05	4.44054e-05	0.000196597
Fam110b	99	0.000150076	0.000149608	0.000114083	0.000196366
Prkcsh	154	9.80152e-05	9.9548e-05	0.000116365	0.000195901
Ifitm3	302	0.000196313	0.000194042	6.52759e-05	0.000195691
Tm4sf1	302	0.000196313	0.000194042	6.52745e-05	0.000195691
Mgp	302	0.000196313	0.000194042	6.52732e-05	0.000195691
Ly6c1	302	0.000196313	0.000194042	6.52714e-05	0.000195691
Sparc	302	0.000196313	0.000194042	6.52702e-05	0.000195691
Clec12a	431	0.000418008	0.000409711	0.00015167	0.000195611
Rps15a	181	0.000113338	0.000115261	0.000579271	0.000195184
Myc	69	7.49661e-05	7.40384e-05	4.74881e-05	0.000194678
Cntnap5b	79	5.70542e-05	5.68389e-05	2.70833e-05	0.000194438
Shisa5	134	8.91876e-05	8.99504e-05	0.000202297	0.000194149
Rpl26	144	9.33632e-05	9.46497e-05	0.000105755	0.000193609
Gm5621	181	0.000112906	0.000114848	0.000274004	0.000193282
Ndufb6	86	6.05558e-05	6.06259e-05	3.40378e-05	0.000193137
Ildr2	102	7.1946e-05	7.18467e-05	3.54569e-05	0.000192731
Wee2	98	0.00010198	0.000100807	5.94236e-05	0.000192469
Cep41	77	5.44628e-05	5.39974e-05	1.99761e-05	0.000191671
Slc35f3	143	9.3247e-05	9.41281e-05	0.000164635	0.000191159
Gm4832	121	7.84225e-05	7.85978e-05	4.09979e-05	0.000190945
Mrpl51	90	6.21652e-05	6.2524e-05	4.04319e-05	0.000190771
Slc6a11	123	9.38586e-05	9.26351e-05	3.52641e-05	0.000190705
Enpp1	143	9.03408e-05	9.08792e-05	4.81724e-05	0.000190637
Mustn1	80	5.86626e-05	5.82231e-05	2.54468e-05	0.000190512
Perp	174	0.000108798	0.000110145	0.000126397	0.000190481
Edem1	185	0.000115055	0.00011699	0.000269528	0.000190252
H13	215	0.000135041	0.000138145	0.000660651	0.000190176
Nt5c	111	7.39821e-05	7.42909e-05	3.75146e-05	0.000190004
Mrpl20	131	8.62357e-05	8.69882e-05	9.2018e-05	0.000189838
Rps15a-ps4	175	0.00010964	0.000111658	0.000694606	0.000189609
Anxa5	127	8.55585e-05	8.6028e-05	0.000730247	0.000189586
Lsmem1	54	6.53742e-05	6.52255e-05	4.90055e-05	0.000189479
Trib2	37	4.48526e-05	4.44667e-05	2.79587e-05	0.000189262
Rpl10	176	0.000110138	0.000111983	0.000228579	0.000189228
Abi3	428	0.000316943	0.000314232	0.000168739	0.000189067
Vkorc1l1	177	0.000110816	0.000112406	0.000143893	0.000188938
Rps27	160	0.000101202	0.000102574	0.000206895	0.000188538
Ccdc107	195	0.000131552	0.000133545	0.000245	0.000188471
Bet1	130	8.53107e-05	8.56197e-05	4.89375e-05	0.000188083
Lpar6	96	6.97007e-05	6.9627e-05	3.67249e-05	0.000187945
Pfn1	115	7.78272e-05	7.84849e-05	0.000227074	0.000187916
Lgals9	70	6.83468e-05	6.7636e-05	3.37871e-05	0.000187842
Frmd7	188	0.000140572	0.000139879	7.68101e-05	0.000187718
Pkn3	102	0.000145517	0.000146376	0.00018538	0.000187399
Fabp5	111	7.74163e-05	7.8085e-05	0.000124965	0.000187302
Eci2	173	0.000107903	0.000109469	0.000144998	0.000187085
Kcnmb1	40	3.96744e-05	3.93046e-05	2.12278e-05	0.000186655
Fn3k	83	0.000111385	0.00011137	0.000100565	0.000186255
Tmem9b	125	8.44127e-05	8.48007e-05	6.7817e-05	0.000186176
Vsig10	143	9.41479e-05	9.50461e-05	0.000108749	0.000185946
Mrpl17	184	0.000114763	0.000116657	0.000142109	0.000185945
D630023F18Rik	73	6.14739e-05	6.17249e-05	4.99524e-05	0.000185939
Gml2	26	3.31881e-05	3.26917e-05	1.94515e-05	0.000185903
Gm31718	41	6.43439e-05	6.40716e-05	4.76929e-05	0.000185801
Rgs17	127	8.58398e-05	8.67946e-05	0.000478802	0.000185747
Eci3	103	9.44397e-05	9.3736e-05	5.71435e-05	0.000185677
Ufm1	125	8.34506e-05	8.44815e-05	0.000334948	0.000185474
Pglyrp1	593	0.000737451	0.000727445	0.000373033	0.00018525
Ier2	87	6.34018e-05	6.32011e-05	2.81772e-05	0.000185232
Dap	159	0.000101342	0.000102614	0.000101635	0.000184964
Gm1673	158	0.000100862	0.000101964	8.41562e-05	0.000184887
Rps27l	76	5.6638e-05	5.62273e-05	3.67062e-05	0.000184804
Rpl15	136	8.98737e-05	9.10583e-05	0.000157743	0.000184716
Pole	73	9.47532e-05	9.4474e-05	7.12155e-05	0.000184195
4930503E24Rik	105	7.36324e-05	7.37529e-05	3.79718e-05	0.000184041
Pold4	118	7.69545e-05	7.77622e-05	4.84039e-05	0.000183832
Cmc4	94	6.49139e-05	6.44998e-05	2.63467e-05	0.000183693
Gm7443	493	0.000403583	0.000399952	0.000195881	0.000183607
Rem2	71	5.82884e-05	5.83149e-05	3.52676e-05	0.000183575
Gm34759	186	0.000137913	0.000137809	9.00896e-05	0.00018357
Scrg1	126	8.64258e-05	8.37668e-05	1.773e-05	0.000183369
Tnfaip8l2	428	0.000409971	0.000402052	0.000157208	0.000182923
Gm20756	391	0.000298419	0.000293872	0.000123533	0.000182678
Tdrd6	447	0.00032136	0.0003179	0.000114661	0.000182228
Gm31816	95	6.6255e-05	6.58898e-05	2.97996e-05	0.000182221
Rpl23	165	0.000104502	0.000105949	0.000174238	0.000182116
Gm35696	47	6.85914e-05	6.85634e-05	5.15829e-05	0.000181695
Cycs	95	6.66255e-05	6.66775e-05	6.17944e-05	0.000181648
Hacd2	87	6.45837e-05	6.437e-05	3.54424e-05	0.000181601
Arg1	129	8.48582e-05	8.50563e-05	8.12601e-05	0.000181438
A530058N18Rik	100	0.000112529	0.000112182	7.56587e-05	0.000180923
Cox5a	140	9.01592e-05	9.08744e-05	5.98389e-05	0.000180739
Rplp2	166	0.000105578	0.000107321	0.000213718	0.00018071
Gng2	115	7.85458e-05	7.89696e-05	6.65965e-05	0.000180676
Plk2	104	7.29221e-05	7.29807e-05	3.68423e-05	0.000180403
Wbp1	163	0.00010341	0.000104201	8.05871e-05	0.000180343
Insl6	47	4.51697e-05	4.49014e-05	2.64543e-05	0.000180124
Col4a5	885	0.00150333	0.0014831	0.000803999	0.000180039
Prrg2	115	7.62544e-05	7.66326e-05	4.22948e-05	0.000179998
Gemin6	35	6.72196e-05	6.74428e-05	6.85911e-05	0.000179762
Abhd17c	90	0.000127148	0.000127419	0.000120878	0.000179609
Mpg	172	0.000107491	0.000108639	9.32186e-05	0.000179468
Gm36677	54	7.25697e-05	7.17499e-05	4.18338e-05	0.000179009
Gm8909	70	6.10995e-05	6.08875e-05	9.28543e-05	0.000178999
Ica1l	113	7.82636e-05	7.83249e-05	4.67178e-05	0.000178896
Lsm6	99	6.93523e-05	6.91947e-05	3.02618e-05	0.000178775
Ndufa8	111	7.84811e-05	7.87935e-05	0.0066767	0.000178697
Sema4c	175	0.000158761	0.00015569	5.66198e-05	0.000178148
Ttc39d	256	0.000356324	0.00035322	0.000212921	0.00017809
Rdh16	63	4.94881e-05	4.88862e-05	2.02581e-05	0.000178028
Tmem205	125	8.22821e-05	8.27755e-05	4.88703e-05	0.000177944
Gm5481	205	0.000146916	0.000148713	0.000188331	0.000177749
Eef1g	169	0.00010716	0.000109141	0.000235498	0.000177732
Piwil1	470	0.00041625	0.000412079	0.000194624	0.000177636
Itgal	64	6.47473e-05	6.44919e-05	4.70628e-05	0.000177531
Krtap17-1	64	5.33026e-05	5.29125e-05	2.64867e-05	0.000177468
Dnajc19	56	4.76209e-05	4.71988e-05	2.24938e-05	0.000177449
Rpl27	132	8.67351e-05	8.76941e-05	8.95733e-05	0.000177368
Gm29642	170	0.000113077	0.000111022	2.99454e-05	0.000177247
Tapbpl	187	0.000117696	0.000119689	0.000204052	0.000176824
Shroom1	81	9.85886e-05	9.73115e-05	5.81673e-05	0.000176721
Skint8	78	8.2213e-05	8.30546e-05	0.000120217	0.000176318
Coa4	125	8.66166e-05	8.66336e-05	5.49832e-05	0.00017623
Abcg2	97	6.82473e-05	6.86475e-05	0.000242218	0.000175984
1700123M08Rik	551	0.00046252	0.000457814	0.000201854	0.000175922
Gm21284	189	0.000367828	0.000368585	0.000360642	0.000175808
Fam228b	173	0.000151595	0.000151039	0.000106017	0.000175689
4933430I17Rik	90	7.98085e-05	8.04791e-05	8.11835e-05	0.000175625
Gnas	122	8.17495e-05	8.19803e-05	5.04006e-05	0.000175517
AU022252	81	6.77774e-05	6.78985e-05	5.80056e-05	0.000175466
Gm12853	98	6.49932e-05	6.48004e-05	2.76347e-05	0.000175464
Mcub	111	7.49e-05	7.51088e-05	3.49246e-05	0.000175458
Atp10a	84	6.03404e-05	6.04525e-05	3.12387e-05	0.00017545
Dynlrb1	108	7.35176e-05	7.42645e-05	0.000379445	0.000175447
Cd274	65	5.60372e-05	5.60469e-05	3.43914e-05	0.000175246
Rpl35a	178	0.000111713	0.000113619	0.000585982	0.000175245
Optn	88	6.55911e-05	6.49748e-05	4.09832e-05	0.000174928
Gm9794	163	0.000104056	0.00010529	0.000145507	0.000174845
Ndufs3	147	9.37076e-05	9.46879e-05	6.40287e-05	0.000174735
Rpl27a	178	0.00011199	0.000113793	0.000327966	0.000174551
Senp7	163	0.00010255	0.000103469	6.51795e-05	0.000174179
Rps27rt	171	0.000107288	0.00010883	0.000274893	0.00017412
Eef1a2	62	6.32187e-05	6.29849e-05	4.57745e-05	0.000174112
Tmem45a	172	0.00010893	0.000109204	7.11473e-05	0.00017408
Cltrn	161	0.000109924	0.00011048	0.000130422	0.000173988
Pcdhb12	107	8.64881e-05	8.54116e-05	3.52843e-05	0.000173952
1600014C10Rik	162	0.000101046	0.000101693	7.28951e-05	0.000173906
Mcee	176	0.000109163	0.000110664	0.000213725	0.000173636
Gm8451	177	0.000111157	0.000112772	0.00028391	0.000173376
Dph3	141	8.97877e-05	9.07509e-05	6.34373e-05	0.000173339
Wdr83os	125	8.2655e-05	8.30153e-05	5.04629e-05	0.000173264
Tgfb1	58	5.47615e-05	5.49579e-05	7.41536e-05	0.000173213
1810019N24Rik	213	0.000131947	0.000128472	2.23135e-05	0.000173189
Fbxl15	115	8.43782e-05	8.4435e-05	0.000247507	0.00017303
Ergic3	193	0.000120959	0.000123191	0.000318729	0.000172977
Gm13102	590	0.00104952	0.00105644	0.00124944	0.000172394
Fuom	118	8.0829e-05	8.1473e-05	7.42597e-05	0.000172133
Zfp850	78	7.55423e-05	7.46167e-05	3.67423e-05	0.000172079
Acsl5	111	7.93818e-05	7.95325e-05	0.00335525	0.000171767
Vim	82	6.18113e-05	6.13636e-05	3.10243e-05	0.000171617
Gm8363	56	7.25076e-05	7.21305e-05	4.91848e-05	0.00017161
Srp19	69	5.57142e-05	5.55313e-05	0.000149733	0.000171593
Ccdc59	89	6.07029e-05	6.08349e-05	3.41406e-05	0.000171539
Rsph1	85	6.28806e-05	6.2745e-05	8.66715e-05	0.000171436
Dtl	103	0.000143687	0.000144023	0.000153035	0.000171117
Card19	97	6.94645e-05	6.98358e-05	0.000642047	0.000171062
Lgmn	138	8.93489e-05	9.00919e-05	6.53064e-05	0.000170968
Msh5	85	0.00013482	0.000135565	0.000132898	0.000170953
Plgrkt	108	7.42243e-05	7.45185e-05	0.000554535	0.000170943
Cfb	63	5.18449e-05	5.13957e-05	2.39824e-05	0.000170942
Spag6l	57	5.1901e-05	5.18439e-05	3.87659e-05	0.00017056
C2cd4a	61	5.8638e-05	5.85632e-05	4.4287e-05	0.000170517
Inpp5f	116	7.9476e-05	7.99704e-05	9.37318e-05	0.000170397
Scml2	632	0.000770191	0.000753982	0.000303669	0.000170131
Timm17b	154	9.78969e-05	9.88609e-05	9.688e-05	0.00017004
Gm15559	130	0.000129877	0.000129912	0.000125858	0.000170026
Gm40331	92	0.000151704	0.000151701	0.000133237	0.000169965
Mn1	17	2.83309e-05	2.80873e-05	1.90513e-05	0.000169878
4930417O13Rik	73	5.54309e-05	5.48549e-05	2.46714e-05	0.000169841
Prdx2	139	9.1748e-05	9.27487e-05	0.000133194	0.000169776
Gm12191	134	8.8107e-05	8.89822e-05	6.82139e-05	0.000169701
Sparcl1	49	5.40518e-05	5.32037e-05	2.64891e-05	0.000169678
Rplp1	144	9.48105e-05	9.59393e-05	0.000154125	0.000169519
Pnp	114	7.72224e-05	7.76483e-05	9.01981e-05	0.000169494
Ier5	57	7.5129e-05	7.48072e-05	7.06626e-05	0.000169344
Gm13165	59	7.04215e-05	7.00889e-05	4.9773e-05	0.000169236
Rps3a1	174	0.000110613	0.000112168	0.000379873	0.000169109
Igsf5	133	8.74962e-05	8.80146e-05	6.53578e-05	0.00016873
Itgam	51	5.53085e-05	5.52967e-05	4.23699e-05	0.000168562
Smim22	147	9.55824e-05	9.60674e-05	6.11984e-05	0.000168418
Sytl2	71	9.09428e-05	9.09634e-05	8.11952e-05	0.000168403
Rom1	139	8.8731e-05	8.92023e-05	5.11336e-05	0.000168012
E030024N20Rik	53	5.23454e-05	5.20815e-05	3.24435e-05	0.000167576
Gm41505	51	4.8446e-05	4.76827e-05	2.28383e-05	0.000167336
Wdr89	157	0.000101734	0.000103006	0.000150972	0.000166819
BC031181	153	9.70714e-05	9.8171e-05	8.9714e-05	0.000166763
Decr1	94	6.5751e-05	6.60108e-05	0.000135468	0.000166696
Faim2	58	4.8958e-05	4.83496e-05	2.33612e-05	0.000166578
Hgfac	168	0.000104921	0.000106334	0.000139115	0.000166559
Olfm1	131	8.83553e-05	8.90176e-05	0.000194076	0.000166515
Ankrd34c	45	4.82274e-05	4.80002e-05	3.51401e-05	0.000166432
Fn1	312	0.000211958	0.000210059	7.67154e-05	0.00016614
Lrit2	244	0.000540921	0.000546487	0.000817694	0.000165777
Etv4	55	4.65265e-05	4.6191e-05	2.58561e-05	0.000165468
Ggh	180	0.000113585	0.000115182	0.000267927	0.000165101
Gm16638	115	0.000163573	0.000163454	0.000147999	0.000165066
Gm36738	109	7.40562e-05	7.36012e-05	3.27678e-05	0.000164691
Rpl31	163	0.000104151	0.000105725	0.000539041	0.000164581
Gabarapl2	130	8.53731e-05	8.62819e-05	8.62424e-05	0.000164538
Lsm3	47	5.81545e-05	5.78786e-05	5.2291e-05	0.000164295
Lypd6b	74	6.07064e-05	6.04628e-05	4.20145e-05	0.000164291
Chid1	173	0.000108537	0.00010987	0.000114181	0.000164257
Myzap	168	0.000126982	0.000125913	6.52509e-05	0.000164184
Foxs1	49	5.45223e-05	5.44578e-05	4.58102e-05	0.00016385
Rpl36al	136	8.8605e-05	8.94033e-05	5.99284e-05	0.000163724
Rplp0	171	0.000109168	0.000110551	0.000322493	0.000163389
Gm20754	69	8.68162e-05	8.69274e-05	8.56317e-05	0.000162947
Tmem19	71	8.40572e-05	8.36778e-05	5.78874e-05	0.00016272
1700020G17Rik	62	5.64846e-05	5.53794e-05	2.22365e-05	0.000162688
Jakmip2	58	4.77883e-05	4.72605e-05	2.40773e-05	0.000162538
Rpl30	130	8.61867e-05	8.70606e-05	6.98948e-05	0.000162535
Mcu	95	6.45389e-05	6.43167e-05	2.55049e-05	0.000162376
Tmem234	102	7.07199e-05	7.11502e-05	8.14187e-05	0.000162177
Ces1g	62	4.93462e-05	4.8916e-05	2.29092e-05	0.000162077
Elof1	116	8.15175e-05	8.18816e-05	0.000894883	0.000161884
Apba2	80	9.99847e-05	9.94899e-05	6.64378e-05	0.000161853
Rpl12	142	9.28549e-05	9.3882e-05	9.02869e-05	0.000161528
Tmem59	215	0.000138791	0.000141977	0.000643641	0.000161451
Rpl28	163	0.000107084	0.000108072	0.000134761	0.000160925
Ubtfl1	53	4.61701e-05	4.57965e-05	2.69715e-05	0.000160823
Rpl11	142	9.37603e-05	9.48584e-05	0.000112126	0.000160524
Ttc41	54	7.41355e-05	7.39583e-05	5.91384e-05	0.000160472
Rpl6	160	0.000103605	0.000104987	0.000250555	0.000160379
Rpl14	140	9.23996e-05	9.30777e-05	7.76861e-05	0.000160283
Ccdc137	122	8.12137e-05	8.11163e-05	4.61391e-05	0.000159958
Serpini1	178	0.000111717	0.000113573	0.000141919	0.000159894
Hectd2	58	5.55438e-05	5.57151e-05	4.3606e-05	0.000159794
Rpl18	168	0.000107602	0.000109173	0.000156476	0.000159635
B230118H07Rik	122	8.22235e-05	8.27667e-05	7.62926e-05	0.000159583
Yipf1	113	7.68243e-05	7.67492e-05	3.53011e-05	0.000159569
B230216N24Rik	161	0.000125421	0.000125801	9.6212e-05	0.000159509
Lipo2	82	6.1953e-05	6.17434e-05	3.11202e-05	0.000159134
Spib	70	9.08503e-05	9.03765e-05	6.04215e-05	0.000159129
Cox4i1	131	8.7503e-05	8.82131e-05	0.000107367	0.00015907
Rpl23a	152	9.86312e-05	9.98811e-05	0.000104338	0.000158944
Ell2	143	9.30591e-05	9.39862e-05	9.40154e-05	0.000158943
Fgl1	292	0.00020127	0.000200082	0.000100116	0.000158816
Dhfr	195	0.000131854	0.000132294	0.000100864	0.000158792
Kctd17	122	8.25645e-05	8.29393e-05	5.96587e-05	0.000158659
Qrsl1	180	0.000119983	0.000121668	0.000139898	0.000158377
Lynx1	60	4.63535e-05	4.59027e-05	2.19821e-05	0.000158143
Ddo	89	0.000129823	0.000130013	0.000119018	0.000157944
Bcap31	129	8.41441e-05	8.49579e-05	6.96901e-05	0.000157657
Lgals7	85	0.000131912	0.000132465	0.000116519	0.000157556
Gm20752	64	8.12881e-05	8.06905e-05	4.92759e-05	0.000157459
Gm32816	48	7.1316e-05	7.08391e-05	5.46651e-05	0.00015741
Copz2	200	0.000137643	0.000140185	0.000222663	0.000157355
Plat	44	4.73333e-05	4.741e-05	4.45654e-05	0.000157207
Vti1b	110	7.45485e-05	7.5138e-05	0.000109109	0.000157117
Cgrrf1	115	7.59345e-05	7.61507e-05	4.99258e-05	0.000156931
a	249	0.000171193	0.000169917	7.58675e-05	0.000156597
Prdx5	174	0.000111122	0.000112428	0.000121561	0.000156585
St3gal3	108	7.40215e-05	7.43458e-05	4.42651e-05	0.000156441
Faap20	132	8.5566e-05	8.59664e-05	4.9486e-05	0.000156437
Mtus2	46	4.69065e-05	4.68936e-05	3.07103e-05	0.000156314
Rps10	139	9.30265e-05	9.38502e-05	9.1986e-05	0.000156288
Fbxw21	35	3.68712e-05	3.644e-05	1.96186e-05	0.000156274
Gm553	39	5.18571e-05	5.15583e-05	3.41505e-05	0.000156263
Sdc3	76	0.000100781	0.000100574	7.42193e-05	0.000156197
Gm36169	54	5.41855e-05	5.38387e-05	3.10321e-05	0.000156131
Arap2	54	7.79269e-05	7.78573e-05	6.32065e-05	0.000156125
Ndufb9	96	6.81619e-05	6.83222e-05	4.73721e-05	0.00015593
Zcrb1	138	9.12355e-05	9.1859e-05	7.3647e-05	0.000155861
Slc5a3	67	6.07467e-05	5.96445e-05	2.53775e-05	0.000155816
Ippk	168	0.000106544	0.000107886	0.000131452	0.000155809
Trappc6b	133	8.766e-05	8.81107e-05	6.67701e-05	0.000155732
Ppa1	97	6.74539e-05	6.79225e-05	0.000170982	0.00015572
Dmd	73	6.50632e-05	6.52607e-05	5.17293e-05	0.000155565
Pih1d2	103	7.47846e-05	7.49606e-05	5.65106e-05	0.000155461
Mrpl33	107	7.06913e-05	7.10234e-05	5.25865e-05	0.000155458
Hotairm1	312	0.000214373	0.000212049	8.7008e-05	0.000155286
Rtraf	177	0.00011276	0.000113862	0.000123723	0.000155236
Atp5j	117	7.9197e-05	7.97537e-05	5.96155e-05	0.000155046
Mrpl52	119	8.05092e-05	8.11418e-05	0.000152825	0.000154719
Exoc7	57	5.81771e-05	5.80761e-05	3.87972e-05	0.00015458
2810429I04Rik	63	7.77701e-05	7.74421e-05	5.4685e-05	0.000154451
Ccr4	68	8.48392e-05	8.44406e-05	8.73411e-05	0.000154418
Gm16853	35	4.31863e-05	4.2721e-05	2.65386e-05	0.000154136
Mrpl34	99	7.04573e-05	7.07216e-05	0.000278023	0.000154135
Tc2n	63	5.5131e-05	5.50673e-05	6.85403e-05	0.000154004
Gm15755	40	4.05189e-05	3.99296e-05	2.04459e-05	0.000153881
Tesc	190	0.000121361	0.000123632	0.000215555	0.000153706
Mslnl	70	6.44058e-05	6.33925e-05	2.81682e-05	0.000153663
Ces2f	50	5.3364e-05	5.25342e-05	2.52032e-05	0.00015344
Btf3l4	129	8.42214e-05	8.46223e-05	6.90839e-05	0.000153287
Atp6v1f	135	8.7252e-05	8.79756e-05	8.83346e-05	0.000153129
Mir467g	54	6.67802e-05	6.60938e-05	4.07729e-05	0.000152453
Gm28535	251	0.000201902	0.000197722	6.47565e-05	0.000152394
4930425O10Rik	142	0.000115651	0.000113157	3.74233e-05	0.000152371
Cmas	158	0.000101247	0.000102479	0.000141232	0.000152249
Zfp239	56	4.47887e-05	4.44782e-05	2.14593e-05	0.000152247
Atp5g3	119	8.12052e-05	8.17646e-05	0.000100423	0.000152174
Sval2	111	9.8329e-05	9.82107e-05	7.53709e-05	0.000152085
Fhl2	95	6.7678e-05	6.81069e-05	0.000156282	0.00015208
Mlx	113	8.13772e-05	8.15816e-05	0.0010442	0.000152031
5031439G07Rik	44	5.49324e-05	5.48881e-05	5.73764e-05	0.000151777
Rab5if	114	7.51288e-05	7.53596e-05	3.78895e-05	0.00015173
Gm10653	136	9.24021e-05	9.29937e-05	8.9386e-05	0.000151601
Rps2	133	8.94791e-05	9.02162e-05	0.000105742	0.000151459
St7l	168	0.000108721	0.000109707	7.38934e-05	0.000151434
Yipf6	172	0.000111325	0.000112287	0.00014503	0.000151341
Grm4	88	7.27702e-05	7.13747e-05	2.5234e-05	0.000151273
Gm36742	117	0.000103561	0.00010333	7.93984e-05	0.000151015
Tmem147	115	7.66706e-05	7.72011e-05	5.34313e-05	0.000150959
Gbp6	61	0.000110968	0.000109819	7.08814e-05	0.00015095
Ecd	178	0.000113298	0.000115235	0.000158252	0.000150895
3110040N11Rik	91	6.86684e-05	6.86565e-05	4.57215e-05	0.000150541
Rps8	142	9.50648e-05	9.60061e-05	0.000112877	0.000150414
Cyp2d9	69	0.000101217	0.00010118	9.0087e-05	0.000149958
Bola2	138	9.11377e-05	9.19207e-05	7.5221e-05	0.000149687
Gal	51	5.25566e-05	5.26264e-05	3.94257e-05	0.000149672
Smim20	95	7.52455e-05	7.58401e-05	7.36465e-05	0.000149604
Bex1	120	8.12428e-05	8.16919e-05	7.22979e-05	0.000149521
Gm10941	408	0.000317698	0.000310666	9.23751e-05	0.000149477
Stmn3	163	0.000105581	0.000107314	0.000231755	0.000149455
Steap1	150	9.78788e-05	9.91718e-05	0.000103252	0.000149454
Spon1	64	7.25527e-05	7.175e-05	4.22196e-05	0.000149355
Tent5a	104	7.04416e-05	7.05324e-05	3.51413e-05	0.000149229
Gm39090	642	0.0014687	0.00147612	0.00167671	0.000149217
Six6	40	4.68234e-05	4.65663e-05	2.96184e-05	0.000149093
Lsm4	108	7.55341e-05	7.56698e-05	6.71772e-05	0.000148855
Dnajc15	107	7.82136e-05	7.8321e-05	0.000256479	0.000148816
Btbd17	78	6.78961e-05	6.80536e-05	6.30558e-05	0.000148514
Psmb10	124	8.29751e-05	8.34608e-05	5.28896e-05	0.000148507
Scp2	127	8.29608e-05	8.34896e-05	6.49496e-05	0.00014845
Smyd5	91	6.45009e-05	6.47012e-05	3.12384e-05	0.000148192
Omd	56	4.68675e-05	4.66941e-05	2.80802e-05	0.000147928
Naa20	130	8.63575e-05	8.67832e-05	5.24294e-05	0.000147445
Taf5	69	0.000101766	0.000100611	5.9777e-05	0.000147127
Slc7a15	895	0.00186001	0.0018648	0.00197077	0.000146977
Mrps35	139	8.94479e-05	8.95881e-05	4.52864e-05	0.000146749
Ceacam2	59	5.08206e-05	5.06337e-05	2.68489e-05	0.000146719
Slc35b3	195	0.000137262	0.000138863	0.000130233	0.000146635
Lrrc9	62	9.14654e-05	9.13103e-05	7.72338e-05	0.000146621
Apopt1	145	9.31448e-05	9.38364e-05	9.06858e-05	0.000146603
Gpr89	197	0.000130169	0.000131741	0.000133568	0.000146397
Tmem167	79	5.63898e-05	5.63423e-05	8.0674e-05	0.000146262
Cnot11	83	6.58858e-05	6.6047e-05	5.04791e-05	0.000145972
Pxmp2	71	5.55446e-05	5.49727e-05	2.25621e-05	0.000145952
Ostc	153	9.74271e-05	9.83828e-05	9.26756e-05	0.000145947
Taar4	258	0.000179239	0.000176947	7.70785e-05	0.00014593
Nr4a1	144	9.16573e-05	9.18349e-05	4.7951e-05	0.000145345
Ift22	93	6.46534e-05	6.44298e-05	2.84574e-05	0.000145316
Taf10	135	8.94272e-05	9.00854e-05	6.79508e-05	0.000145313
Gm29711	56	7.34214e-05	7.32609e-05	9.37448e-05	0.000145197
Ogfod3	168	0.00010794	0.000108957	0.000102624	0.000144887
Romo1	85	6.214e-05	6.21391e-05	3.56377e-05	0.000144716
Dpp10	83	7.51068e-05	7.51621e-05	7.23025e-05	0.000144713
Pak1	146	0.000102825	0.00010309	6.48693e-05	0.000144587
Gm11725	61	8.25625e-05	8.26138e-05	6.45142e-05	0.000144565
Rpl17-ps8	144	9.40905e-05	9.49366e-05	8.37202e-05	0.000144479
Nedd8	145	9.54204e-05	9.65998e-05	0.000139495	0.000144479
Tmem218	104	7.05238e-05	7.0328e-05	2.92816e-05	0.000144328
Tpo	98	9.16987e-05	9.09077e-05	5.01002e-05	0.000144267
Dap3	94	7.03913e-05	7.03333e-05	0.00137087	0.000144177
Nmnat2	63	4.68408e-05	4.65819e-05	2.32876e-05	0.000144142
Gm10051	152	9.99396e-05	0.000101185	0.000138512	0.000144019
1700112D23Rik	113	8.25496e-05	8.10762e-05	2.61205e-05	0.000143956
Six3	210	0.000147732	0.000144879	4.40029e-05	0.000143947
Glb1	143	9.13549e-05	9.1321e-05	5.13221e-05	0.000143923
Rps6	157	0.000101744	0.0001029	0.000113324	0.000143673
Panx1	54	4.74482e-05	4.71672e-05	2.50035e-05	0.000143497
1810037I17Rik	107	7.42221e-05	7.40902e-05	4.4054e-05	0.000143319
Nr2f1	65	9.30081e-05	9.27766e-05	7.17034e-05	0.00014329
Il3ra	117	8.03219e-05	8.08942e-05	0.000204632	0.000143253
Crip1	145	9.56945e-05	9.66471e-05	0.00024614	0.000143123
P4ha3	234	0.000432008	0.000432528	0.00048532	0.000143019
Zfp931	133	8.82289e-05	8.83849e-05	4.69117e-05	0.000142904
Chgb	138	8.94573e-05	9.02069e-05	6.73034e-05	0.0001428
Pfdn5	161	0.000104138	0.000105344	0.000113068	0.000142783
Ikbip	156	9.93957e-05	0.000100803	0.000367927	0.000142772
N4bp2l1	138	9.09827e-05	9.14276e-05	7.84238e-05	0.000142581
Serpinb1c	63	5.1031e-05	5.09772e-05	2.79724e-05	0.000142523
Gm10145	31	3.85493e-05	3.82533e-05	2.42122e-05	0.000142457
1110038B12Rik	96	6.73041e-05	6.73753e-05	4.45696e-05	0.000142275
Parpbp	857	0.0012223	0.00122202	0.00112616	0.000142024
Ssu72	103	7.23462e-05	7.22537e-05	6.03396e-05	0.000141767
Wipf1	44	4.39217e-05	4.38538e-05	4.85454e-05	0.000141556
Rsl1d1	117	7.84043e-05	7.87306e-05	5.58992e-05	0.000141397
2810013P06Rik	69	0.000102674	0.000102825	9.07587e-05	0.000141366
Gm15501	141	9.49515e-05	9.56306e-05	8.88378e-05	0.000141217
Adam5	80	6.5947e-05	6.43192e-05	2.24169e-05	0.000141162
Mrps21	87	6.2113e-05	6.23058e-05	4.2648e-05	0.000141069
Nxf3	40	5.12792e-05	5.13646e-05	4.23803e-05	0.000141031
Ly6f	49	6.7942e-05	6.77184e-05	5.20666e-05	0.000140572
Ttll3	121	8.14208e-05	8.1752e-05	6.98664e-05	0.000140564
Bace2	84	8.83422e-05	8.89461e-05	7.57441e-05	0.000140437
Arxes1	151	0.0001027	0.000103268	7.67074e-05	0.000140322
Pdcd6	134	8.95763e-05	9.02553e-05	0.000170557	0.000140217
Yif1a	135	8.77972e-05	8.86828e-05	6.70645e-05	0.000140156
Sf3a3	110	8.01214e-05	8.08379e-05	9.28887e-05	0.000139993
Gtf2a2	102	6.88299e-05	6.89062e-05	3.21376e-05	0.000139913
Bcl2a1d	505	0.000455126	0.000454891	0.000366618	0.000139904
Gm31300	145	9.58697e-05	9.7029e-05	9.57838e-05	0.000139885
Gm10362	155	0.00010005	0.000101215	0.00012029	0.000139849
H2-Q2	75	7.29239e-05	7.33092e-05	6.10408e-05	0.000139606
1110065P20Rik	141	9.14366e-05	9.20007e-05	0.000103583	0.000139445
Gm40557	34	3.79207e-05	3.78865e-05	3.51033e-05	0.000139099
Pawr	127	8.39798e-05	8.4429e-05	5.30844e-05	0.000138867
Mrpl10	106	7.25649e-05	7.25691e-05	4.463e-05	0.000138815
Cpn1	159	0.000101243	0.000102465	0.000169047	0.000138659
Rpl36a	134	9.08039e-05	9.14421e-05	6.81526e-05	0.000138325
Rpl14-ps1	123	8.43417e-05	8.48184e-05	8.65508e-05	0.000138204
Ift20	103	7.06968e-05	7.08281e-05	3.30691e-05	0.000138107
Dusp10	89	6.6893e-05	6.71167e-05	7.2796e-05	0.000138041
Erlec1	177	0.000112661	0.0001146	0.000249316	0.000138019
Ufsp2	146	9.23383e-05	9.2787e-05	7.6011e-05	0.000137995
Trim30d	381	0.000759863	0.000762576	0.000926721	0.000137708
Lipo4	69	0.000137859	0.000137561	0.000108817	0.000137698
Efemp2	123	7.96737e-05	7.97718e-05	4.25681e-05	0.000137488
Tagln2	112	7.77618e-05	7.81589e-05	0.000110187	0.000137365
Dctn3	106	7.67651e-05	7.7049e-05	0.000154706	0.000137174
Appbp2os	47	4.42925e-05	4.39912e-05	2.63996e-05	0.000136992
Serpina1d	58	5.07808e-05	5.0823e-05	4.25471e-05	0.000136968
Golt1b	119	7.9403e-05	7.99115e-05	4.52157e-05	0.000136825
Churc1	76	5.60017e-05	5.60837e-05	7.51783e-05	0.000136552
Pigx	116	7.70653e-05	7.72538e-05	4.8432e-05	0.00013654
Tpt1	188	0.000121725	0.000124265	0.000327935	0.000136382
Ykt6	98	8.10378e-05	8.15547e-05	9.01862e-05	0.000136381
Gm13003	48	5.93237e-05	5.92626e-05	4.31753e-05	0.000136314
Ndufa7	69	5.27414e-05	5.25711e-05	2.79305e-05	0.00013631
Gm12907	39	4.38996e-05	4.37336e-05	3.98394e-05	0.000136164
Creb3	123	8.2246e-05	8.26099e-05	4.88813e-05	0.000136117
Ddrgk1	117	7.98617e-05	8.04253e-05	9.80339e-05	0.000136033
Rps4x	178	0.000116157	0.000117764	0.000248214	0.000135967
Pcbd1	134	8.94857e-05	9.04342e-05	0.000167373	0.000135862
Cdsn	37	4.84705e-05	4.82326e-05	3.41677e-05	0.000135774
Rps6ka5	64	4.70431e-05	4.64634e-05	1.759e-05	0.000135705
Atcay	55	4.57414e-05	4.55382e-05	2.739e-05	0.000135703
Cldn1	21	2.84516e-05	2.80802e-05	1.73425e-05	0.000135274
Naglu	181	0.000117052	0.00011898	0.000195102	0.000135077
Psg29	63	5.80942e-05	5.81685e-05	4.02135e-05	0.000135051
Gbp8	89	6.25917e-05	6.19052e-05	2.36136e-05	0.00013491
Rer1	168	0.000106735	0.000108145	0.000110604	0.00013486
Spout1	135	8.85499e-05	8.92039e-05	8.1487e-05	0.000134787
Mrps7	88	6.06712e-05	6.03521e-05	2.34739e-05	0.000134721
Celsr1	43	7.88917e-05	7.8601e-05	6.12386e-05	0.000134696
Aip	167	0.000108176	0.000110005	0.000175469	0.000134679
Mrps16	87	6.49676e-05	6.51046e-05	0.000231712	0.000134656
Cables1	52	7.8212e-05	7.79856e-05	6.20821e-05	0.000134541
Hsbp1	93	6.50332e-05	6.52865e-05	4.0409e-05	0.000134493
Eloc	99	6.90757e-05	6.90891e-05	3.12246e-05	0.000134471
Dapl1	202	0.000160271	0.000156485	5.00713e-05	0.0001344
Gucy2f	209	0.000144034	0.000142168	5.52584e-05	0.000134259
Nudt5	137	9.04331e-05	9.12959e-05	9.52472e-05	0.000134096
Gm13133	75	0.00010557	0.000104941	8.32754e-05	0.000133757
Rpl17-ps10	134	8.97343e-05	9.03253e-05	6.80313e-05	0.00013372
Gm41793	155	0.000205752	0.000204904	0.000146711	0.000133456
Snap25	181	0.000116915	0.00011906	0.000276015	0.000133426
Rpl17	143	9.36012e-05	9.47231e-05	9.81769e-05	0.000133293
Pon2	157	0.000100263	0.000101301	7.45273e-05	0.000133009
Arl4a	174	0.000111955	0.000113456	0.000231717	0.00013289
Mrpl11	78	5.7633e-05	5.75766e-05	5.93402e-05	0.000132852
Trim68	164	0.000105468	0.000106178	7.00637e-05	0.000132582
Gm34623	50	5.39292e-05	5.26462e-05	2.27784e-05	0.00013239
Fuca1	137	9.12374e-05	9.20467e-05	8.00567e-05	0.000132249
Slc35g2	209	0.000139693	0.000142906	0.000421332	0.000132162
1600023N17Rik	48	4.46358e-05	4.40401e-05	2.20822e-05	0.000132127
Tram1l1	87	6.31298e-05	6.30235e-05	3.72269e-05	0.00013198
Mfsd2a	45	4.16701e-05	4.1221e-05	2.19285e-05	0.000131818
Slc39a11	234	0.000162933	0.000166286	0.00311532	0.0001318
Cox17	61	5.04377e-05	5.02035e-05	3.44522e-05	0.000131786
4930578M01Rik	39	5.25593e-05	5.242e-05	4.05966e-05	0.000131603
Rack1	144	9.72793e-05	9.84605e-05	0.000125718	0.00013138
Fau	133	8.90545e-05	8.98314e-05	7.1521e-05	0.000131309
Pin4	93	6.57192e-05	6.55166e-05	3.33373e-05	0.000131165
Slc5a5	102	0.0001025	0.000101579	6.23947e-05	0.000131031
Nrip3	61	5.59526e-05	5.61834e-05	7.54552e-05	0.000130772
Rmi2	73	6.27564e-05	6.29343e-05	7.10395e-05	0.000130764
Tceal6	217	0.000148712	0.000152056	0.000413292	0.000130748
4933413L06Rik	54	8.69065e-05	8.64158e-05	6.57839e-05	0.00013074
Carmn	36	4.83269e-05	4.79955e-05	3.10242e-05	0.000130739
Dis3l2	73	0.000127153	0.000127233	0.000106802	0.000130626
Dgkb	63	5.54343e-05	5.4866e-05	2.87591e-05	0.000130583
Tmem106c	166	0.000108211	0.000109871	0.000131883	0.000130488
Rwdd4a	119	7.99941e-05	8.01073e-05	5.14916e-05	0.000130425
Rnu2-10	51	5.81231e-05	5.70937e-05	2.82841e-05	0.000130401
Gm16758	153	0.000110292	0.000110617	7.45737e-05	0.000130215
Cox5b	69	5.58111e-05	5.55558e-05	4.19422e-05	0.000130037
Rps15	142	9.53597e-05	9.62157e-05	8.13046e-05	0.000129749
Dnajc19-ps	38	4.37121e-05	4.34061e-05	2.822e-05	0.000129543
Gm13215	165	0.000108878	0.000110223	0.00019112	0.000129505
Casq1	151	0.000292839	0.000294627	0.000306865	0.000129203
Itm2b	140	9.35873e-05	9.46476e-05	0.000239638	0.000129099
Hint1	151	9.95268e-05	0.00010049	9.25993e-05	0.000128981
Hadh	81	0.000119619	0.000120364	0.000142998	0.000128776
Tbl2	117	8.01879e-05	8.05389e-05	6.27082e-05	0.000128556
Abhd18	62	9.39297e-05	9.35193e-05	7.80589e-05	0.000128528
Cdc26	139	9.00265e-05	9.0963e-05	8.46269e-05	0.000128439
0610012G03Rik	94	6.6013e-05	6.6324e-05	6.82554e-05	0.000128385
Guca2b	85	6.20663e-05	6.1921e-05	3.58024e-05	0.000128345
Vstm5	74	0.000135954	0.000135462	0.000102871	0.000128282
Akr1c12	87	6.54791e-05	6.55757e-05	0.000349423	0.000128228
Fam167a	158	0.000103485	0.00010442	7.86644e-05	0.000128028
Stkld1	402	0.000331987	0.000330133	0.00018135	0.000128001
Scel	119	8.30925e-05	8.33268e-05	7.81631e-05	0.000127532
Ppp2r3c	73	5.9015e-05	5.89215e-05	4.56408e-05	0.000127425
St8sia3	171	0.000111274	0.000112194	8.072e-05	0.000127321
Oat	122	8.00889e-05	7.99898e-05	4.41652e-05	0.000127295
Gm3942	49	5.77977e-05	5.7552e-05	3.76139e-05	0.000127291
Washc3	79	5.77374e-05	5.73784e-05	3.04815e-05	0.000127257
Gm10045	129	8.77821e-05	8.83892e-05	6.43676e-05	0.000127211
Pofut2	143	9.60816e-05	9.6968e-05	0.000128862	0.000127097
Tent5b	90	6.50528e-05	6.51123e-05	3.78692e-05	0.000127086
Timm10b	59	5.27488e-05	5.24231e-05	3.00396e-05	0.000126937
Pafah1b3	103	7.27346e-05	7.29295e-05	5.64299e-05	0.000126628
Gm30534	724	0.00115224	0.00115573	0.00121029	0.000126438
Rab11a	133	9.05839e-05	9.11424e-05	0.0001968	0.000126423
Gm45924	80	5.91383e-05	5.84708e-05	2.49295e-05	0.000126359
Fbln5	695	0.00109279	0.00109075	0.000902974	0.000126198
Sf3b5	86	5.99511e-05	6.00326e-05	3.64238e-05	0.000126126
Rap1a	130	8.44772e-05	8.48056e-05	4.59378e-05	0.000126097
Elmod2	40	5.64783e-05	5.61757e-05	3.89891e-05	0.000126031
Jtb	165	0.000108549	0.000109848	0.000215103	0.000125997
Hexa	107	7.56748e-05	7.59732e-05	0.000149972	0.000125927
Neu4	55	4.168e-05	4.12286e-05	1.65961e-05	0.000125882
Calm2	93	7.12565e-05	7.12884e-05	0.000604153	0.000125771
Ppfia4	83	6.19958e-05	6.05136e-05	1.85468e-05	0.000125754
Gas1	755	0.00110282	0.00110332	0.00100778	0.000125675
Vps28	69	5.67911e-05	5.68213e-05	0.000458283	0.000125629
Gsto1	156	0.000103827	0.000104822	0.000152751	0.000125618
Edem2	197	0.000129459	0.000131417	0.000397964	0.000125442
Fbxo36	50	4.2512e-05	4.23533e-05	2.51233e-05	0.000125059
Smbd1	69	9.0157e-05	8.9525e-05	7.10565e-05	0.000125044
Cisd2	78	5.69065e-05	5.68696e-05	3.55836e-05	0.000125031
Gm7334	174	0.000113298	0.000115172	0.000199032	0.00012501
Vav3	87	7.06967e-05	7.04423e-05	4.45631e-05	0.000124996
Gm32899	101	7.05568e-05	7.07453e-05	3.91822e-05	0.000124934
Srp14	107	7.16749e-05	7.20693e-05	5.21429e-05	0.00012484
Myo1e	72	5.86915e-05	5.82732e-05	3.88726e-05	0.000124815
Arhgef40	69	5.44925e-05	5.37739e-05	2.45666e-05	0.00012467
Gm41804	45	8.49033e-05	8.43906e-05	6.27504e-05	0.000124649
Rpl24	131	8.94146e-05	8.985e-05	6.50062e-05	0.000124318
Cnih4	98	6.63147e-05	6.63919e-05	3.43075e-05	0.000124317
Slc50a1	94	6.72821e-05	6.73426e-05	3.41115e-05	0.000124112
Erp44	184	0.000122587	0.000122836	0.000104163	0.000123976
Socs1	55	8.82446e-05	8.78105e-05	6.99273e-05	0.000123794
Commd2	93	6.49876e-05	6.50721e-05	3.47306e-05	0.000123563
Gm5087	88	7.42555e-05	7.3629e-05	4.14061e-05	0.000123536
Fap	26	3.57478e-05	3.58367e-05	3.85794e-05	0.000123527
Efcab7	69	5.18607e-05	5.0951e-05	1.93491e-05	0.000123446
4932412D23Rik	42	7.13822e-05	7.1016e-05	5.23673e-05	0.000123318
Bdnf	91	6.20767e-05	6.24311e-05	3.02849e-05	0.0001233
Sik1	96	6.524e-05	6.48925e-05	2.53302e-05	0.000123291
Lztfl1	139	9.26417e-05	9.40454e-05	9.85921e-05	0.000123237
Gm40348	48	5.88977e-05	5.88835e-05	4.53746e-05	0.000123075
Rcn1	99	6.93383e-05	6.94768e-05	3.65586e-05	0.000123025
Kctd12	90	6.72633e-05	6.75325e-05	0.000260215	0.000122955
Pdxk-ps	258	0.000185956	0.000181853	5.06428e-05	0.000122826
Rhd	86	6.45557e-05	6.41048e-05	4.22009e-05	0.000122658
Itga1	214	0.00018656	0.000183056	7.48416e-05	0.000122477
Gnpnat1	84	5.94112e-05	5.94012e-05	2.96246e-05	0.000122341
Mnd1	438	0.000381159	0.000377223	0.000185578	0.000122276
Hist1h2al	83	6.52079e-05	6.46049e-05	2.92042e-05	0.000122247
Armt1	114	7.52117e-05	7.50386e-05	3.10973e-05	0.00012221
Prr18	192	0.000293063	0.000291406	0.000213306	0.000122131
Brix1	96	6.57633e-05	6.56766e-05	2.76825e-05	0.000122127
Mdh2	134	9.09343e-05	9.16624e-05	0.000110082	0.00012212
Zfp593	108	7.36044e-05	7.37441e-05	4.0737e-05	0.000122092
Plppr3	474	0.00047864	0.000471868	0.000219705	0.000121911
Prdm6	63	6.02155e-05	5.91947e-05	2.91654e-05	0.000121816
Ikbke	64	9.85252e-05	9.8207e-05	7.00822e-05	0.000121786
Spryd7	92	7.21738e-05	7.23329e-05	6.26646e-05	0.000121658
H2-Q1	104	7.32775e-05	7.3322e-05	8.39839e-05	0.000121648
Ppdpf	137	9.02834e-05	9.06797e-05	8.29127e-05	0.000121247
Ms4a4d	39	4.20133e-05	4.20809e-05	0.000188526	0.000121152
Cnih3	438	0.000461973	0.000450585	0.000162689	0.000120869
Slc24a3	67	5.00266e-05	4.9835e-05	2.35339e-05	0.000120804
Cacna1h	34	3.8318e-05	3.7901e-05	2.20995e-05	0.000120699
Il7	179	0.000128886	0.000127122	5.74139e-05	0.000120539
Tubg1	72	5.33509e-05	5.31814e-05	2.48161e-05	0.000120528
Nr4a2	119	7.66078e-05	7.62564e-05	2.93663e-05	0.000120114
Dach2	54	4.1761e-05	4.11917e-05	1.58579e-05	0.00012009
Atp5g2	130	8.96758e-05	9.03701e-05	0.000129169	0.000119969
Hras	91	6.98892e-05	7.00932e-05	0.000121623	0.000119911
Gm11478	135	9.21087e-05	9.30109e-05	8.21125e-05	0.000119819
Tfb2m	80	6.5687e-05	6.56778e-05	0.000194801	0.000119661
Gfra1	54	8.4022e-05	8.46673e-05	0.00010461	0.000119572
Lmo1	183	0.000119533	0.000120925	0.000152005	0.000119282
Glrp1	76	5.69202e-05	5.54203e-05	1.6458e-05	0.000119262
Tmem223	120	7.79421e-05	7.79536e-05	3.9258e-05	0.000119026
Slc35a1	197	0.000143571	0.000144559	0.000149931	0.00011894
Hyi	97	7.34083e-05	7.31911e-05	0.000140951	0.0001188
A830005F24Rik	220	0.000160743	0.000159691	7.33918e-05	0.000118461
Btg3	175	0.000114426	0.000116571	0.000205393	0.000118342
Gm15420	69	5.01005e-05	4.98026e-05	2.2993e-05	0.00011832
Sdf4	191	0.000126516	0.00012961	0.000874315	0.000118172
Mrpl23	95	6.85685e-05	6.85783e-05	4.69513e-05	0.00011813
Synrg	139	9.25034e-05	9.31145e-05	8.44568e-05	0.000117842
Bri3bp	94	6.77826e-05	6.76272e-05	7.94567e-05	0.000117827
Hdac9	44	6.02398e-05	6.01315e-05	4.68295e-05	0.000117726
Dcdc5	178	0.000130441	0.00013114	0.000102937	0.000117672
Sil1	165	0.00010779	0.000109175	0.000142206	0.000117646
P3h4	216	0.000150812	0.000153503	0.00374785	0.000117485
Zfp330	50	4.59613e-05	4.56934e-05	2.43459e-05	0.00011746
Gbp4	488	0.000471555	0.000470514	0.000345248	0.000117416
Itga2	99	0.000187584	0.000188361	0.000217779	0.000117408
A730006G06Rik	53	5.86791e-05	5.82009e-05	3.34808e-05	0.000117326
Gm9385	127	8.73029e-05	8.77936e-05	6.55649e-05	0.000117206
Emc3	108	7.11798e-05	7.11239e-05	3.44153e-05	0.000117179
Bambi-ps1	72	5.6839e-05	5.66635e-05	2.79664e-05	0.000117175
Acot7	95	0.000105423	0.000105633	0.000128239	0.000117147
Arpc2	114	8.02014e-05	8.06503e-05	0.000182136	0.000117109
Gm15638	63	5.25014e-05	5.21527e-05	3.66639e-05	0.000117033
Rab3b	159	0.000105351	0.000106523	0.000176852	0.000117022
Polr3d	98	7.16773e-05	7.13643e-05	4.05177e-05	0.000116852
Tmem53	99	8.38641e-05	8.40864e-05	0.000116778	0.000116846
Olfm3	35	4.19195e-05	4.15141e-05	2.3806e-05	0.00011679
Milr1	62	5.01912e-05	4.99128e-05	2.50561e-05	0.000116685
Arc	72	5.28253e-05	5.24049e-05	2.02832e-05	0.000116637
Stard10	115	8.31663e-05	8.3375e-05	0.000105493	0.000116424
Dram2	112	7.6402e-05	7.65566e-05	4.81043e-05	0.000116253
Mcts1	86	5.98003e-05	5.97504e-05	2.95363e-05	0.000116215
Fam177a	103	7.3829e-05	7.42696e-05	5.6203e-05	0.000116211
Zswim7	96	6.75475e-05	6.77068e-05	3.58189e-05	0.000116031
Fam216a	158	0.000102263	0.000103296	0.000104417	0.000115935
Scarna17	43	7.63078e-05	7.56247e-05	5.27301e-05	0.000115851
C1galt1c1	152	0.000103518	0.000103966	6.55294e-05	0.000115757
Selenof	136	9.19137e-05	9.25839e-05	7.57764e-05	0.000115703
Gm6093	91	0.000221374	0.000222019	0.000214059	0.000115628
Gm13830	35	3.00018e-05	2.96067e-05	1.34479e-05	0.000115628
Snrpg	90	6.14597e-05	6.16253e-05	3.77351e-05	0.000115358
Chaf1a	61	7.57858e-05	7.52007e-05	5.29067e-05	0.000115336
Ccdc175	38	6.62016e-05	6.57096e-05	4.95436e-05	0.000115246
Mpv17l	107	7.83097e-05	7.86272e-05	0.0001881	0.000115215
Rab3ip	136	9.00107e-05	9.07386e-05	5.83136e-05	0.000115113
Rps5	127	8.60312e-05	8.65292e-05	6.63351e-05	0.00011511
Lsr	136	9.26111e-05	9.32857e-05	0.000147595	0.000115049
Tmem219	90	6.47472e-05	6.45764e-05	3.1362e-05	0.000115028
Ctsz	102	7.3799e-05	7.39521e-05	0.0001807	0.000114606
Rpl21	132	9.04213e-05	9.13073e-05	7.76018e-05	0.00011444
Clec10a	500	0.000847842	0.000848173	0.000759597	0.000114415
Slc35a2	107	7.27192e-05	7.31013e-05	4.1244e-05	0.000114323
Nudt19	107	7.48575e-05	7.51021e-05	5.23677e-05	0.000113869
Gm13288	22	2.97623e-05	2.95048e-05	1.87067e-05	0.000113732
BC052040	86	6.26022e-05	6.22712e-05	2.44807e-05	0.000113677
Dct	86	0.000136361	0.00013679	0.000131263	0.000113652
Gm14408	45	5.41262e-05	5.37355e-05	3.58665e-05	0.000113539
n-R5s136	370	0.000348235	0.000340759	0.000122318	0.000113474
Mrrf	153	9.83567e-05	9.91057e-05	5.67787e-05	0.000113467
Astn1	63	4.88872e-05	4.83961e-05	2.18549e-05	0.000113323
Tnr	65	8.33643e-05	8.38068e-05	0.000106862	0.000113302
Rnf112	59	5.45656e-05	5.43279e-05	3.16194e-05	0.000113276
Phlda1	85	5.99071e-05	5.96866e-05	2.54352e-05	0.000113247
Anxa4	164	0.000108271	0.000109841	0.000241798	0.000112976
Cndp1	416	0.000926776	0.000921199	0.000685539	0.000112932
Gm39929	38	3.2435e-05	3.20981e-05	1.68316e-05	0.000112831
Lmf1	136	9.24405e-05	9.32257e-05	9.65699e-05	0.0001128
E230032D23Rik	69	9.58212e-05	9.55913e-05	7.26141e-05	0.000112694
Rasa2	66	5.28018e-05	5.24463e-05	3.05708e-05	0.000112677
Gm10406	168	0.000110698	0.000112069	0.000108541	0.000112579
Myl12b	127	8.62743e-05	8.61004e-05	5.2788e-05	0.000112551
Ndufv2	96	6.82139e-05	6.82937e-05	3.84673e-05	0.000112429
Gm36356	32	5.21836e-05	5.18761e-05	3.48616e-05	0.000112199
Pdcd5	125	8.44357e-05	8.48126e-05	5.63483e-05	0.000112133
Gale	78	6.36109e-05	6.35992e-05	0.000122614	0.000112119
Ndufb4c	103	7.27787e-05	7.28634e-05	4.93938e-05	0.000112086
Traf3ip2	70	5.3022e-05	5.27953e-05	2.49534e-05	0.000112014
Tmtc2	161	0.000105749	0.000107443	0.000153452	0.000111986
P4htm	134	9.06382e-05	9.15396e-05	0.00196958	0.00011168
Zeb2os	94	6.5045e-05	6.50673e-05	3.93262e-05	0.0001116
Gm36043	165	0.000106658	0.000107982	0.000123357	0.000111489
5830417I10Rik	71	5.51103e-05	5.47902e-05	3.21492e-05	0.000111476
Rpl13a	130	8.96107e-05	9.0651e-05	8.46266e-05	0.000111452
Mmadhc	126	8.45778e-05	8.53182e-05	5.45862e-05	0.000111242
Lrrc2	76	6.46937e-05	6.46292e-05	3.94248e-05	0.000111009
Fra10ac1	53	5.62222e-05	5.6485e-05	4.79017e-05	0.000110963
Shank1	110	0.000201736	0.0002015	0.000169381	0.000110946
Creb3l3	40	6.03176e-05	5.98553e-05	3.95315e-05	0.00011079
Lamtor4	85	6.13988e-05	6.1291e-05	4.09224e-05	0.000110739
Ndufs8	151	0.00010037	0.000101515	8.44472e-05	0.000110708
Ly96	40	4.186e-05	4.18637e-05	3.07966e-05	0.00011067
Tceal8	168	0.00011318	0.000114352	0.00010718	0.000110641
Gm34701	179	0.000369651	0.000371294	0.000395	0.000110613
Gtf2h5	68	5.25399e-05	5.25013e-05	5.18769e-05	0.000110592
Gm15343	430	0.000891852	0.000891956	0.00102006	0.000110505
Gm13274	54	8.22313e-05	8.22151e-05	8.04212e-05	0.000110393
Mllt11	89	6.75882e-05	6.75318e-05	8.79121e-05	0.000110334
Tlcd1	48	3.83835e-05	3.8056e-05	1.95381e-05	0.000110287
Dazl	34	6.57906e-05	6.62621e-05	7.57233e-05	0.000110229
Gm2762	51	0.000136065	0.00013564	0.000116708	0.000110077
Pmel	36	3.45906e-05	3.41221e-05	1.75901e-05	0.000109821
Txn2	100	7.02188e-05	7.02644e-05	4.05491e-05	0.000109766
Dpy30	159	0.000106956	0.000107339	0.000213802	0.000109574
Hist1h2bq	99	7.0718e-05	7.1141e-05	6.66863e-05	0.000109473
Gm11733	54	5.62066e-05	5.59041e-05	3.55783e-05	0.000109448
Adamtsl3	574	0.000991869	0.000991419	0.00087495	0.000109253
Spint2	149	0.000101504	0.0001028	0.000103691	0.0001092
Ndufb3	73	5.50368e-05	5.50528e-05	3.92676e-05	0.000109195
Sdc2	119	8.31698e-05	8.33599e-05	6.45148e-05	0.000109139
Hsd17b7	55	8.41132e-05	8.41725e-05	7.28352e-05	0.000109107
Gm2449	52	7.27432e-05	7.28961e-05	6.15854e-05	0.000108941
Ikzf2	55	8.24573e-05	8.16242e-05	5.19222e-05	0.000108915
Gm3776	61	7.66846e-05	7.60795e-05	5.6049e-05	0.000108908
1700010I02Rik	78	0.000131422	0.00013134	9.92605e-05	0.000108901
Gm11423	132	9.3556e-05	9.33879e-05	4.72506e-05	0.000108887
Gucy1b1	146	9.61141e-05	9.68233e-05	6.19858e-05	0.000108796
Gm7977	45	4.68675e-05	4.64656e-05	2.58363e-05	0.000108708
Polr2k	70	5.29247e-05	5.26657e-05	3.27962e-05	0.000108689
2010300C02Rik	39	6.23821e-05	6.24491e-05	6.67862e-05	0.000108688
Pcdhb3	184	0.000248565	0.000246342	0.0001675	0.000108594
Dcaf17	95	7.42192e-05	7.46857e-05	7.55512e-05	0.000108523
Eif1	121	8.37896e-05	8.40458e-05	0.000111059	0.000108282
Zfand4	149	0.000104089	0.000103715	5.41615e-05	0.000108238
Glipr1	718	0.00101977	0.00100266	0.000498133	0.00010818
Gm31532	166	0.000175516	0.000171923	7.51401e-05	0.000108031
Crem	117	0.000103585	0.000103668	8.55613e-05	0.000108019
Agr2	22	3.38535e-05	3.3682e-05	2.38371e-05	0.000107992
Tubgcp6	60	7.09137e-05	7.12169e-05	5.57567e-05	0.000107983
Rpl13-ps6	140	9.58305e-05	9.68368e-05	9.3379e-05	0.00010774
Herc4	156	0.000102759	0.000103433	7.66562e-05	0.000107656
Gas5	152	0.000102494	0.000103474	0.000108219	0.000107533
Exo1	201	0.000146388	0.000145155	6.79772e-05	0.000107353
Gm6578	50	3.94587e-05	3.89002e-05	1.48547e-05	0.000107352
Plcd3	103	6.74957e-05	6.71191e-05	2.55422e-05	0.00010719
5730480H06Rik	34	5.07996e-05	5.0574e-05	3.67236e-05	0.000107062
Mamdc4	243	0.000442093	0.000435959	0.000267463	0.000106745
Shisa2	169	0.000116331	0.000117703	0.000146583	0.00010673
Pdlim4	165	0.000357608	0.000359437	0.000466614	0.000106624
A730009L09Rik	50	6.58682e-05	6.50336e-05	3.96755e-05	0.000106317
A330040F15Rik	53	4.30449e-05	4.27655e-05	1.99227e-05	0.00010622
Nat14	96	7.33839e-05	7.31285e-05	4.03733e-05	0.000106193
Dstn	99	7.4478e-05	7.42386e-05	8.04575e-05	0.000106191
Tmtc1	73	7.00164e-05	7.0329e-05	7.72534e-05	0.000106126
Brk1	99	6.82161e-05	6.84723e-05	4.34587e-05	0.000106091
Kcnk6	103	6.78801e-05	6.80134e-05	3.19407e-05	0.000106058
Bag3	115	7.79507e-05	7.8204e-05	5.04377e-05	0.000106028
H2-T23	100	7.17229e-05	7.17608e-05	0.000135863	0.000105792
Tmem107	154	0.000103771	0.000105288	0.000132147	0.000105766
Zfp575	80	6.161e-05	6.14994e-05	4.01896e-05	0.000105693
Bola3	95	6.62371e-05	6.61904e-05	4.40873e-05	0.000105669
Gm15032	145	9.71916e-05	9.8594e-05	0.00013101	0.000105518
Fbxo5	451	0.000452411	0.000450868	0.000316809	0.000105434
Ubac2	139	9.16565e-05	9.18126e-05	4.87188e-05	0.000105386
Commd6	117	8.14917e-05	8.1841e-05	5.31725e-05	0.000105317
Tslp	321	0.000322029	0.000318771	0.000173945	0.00010524
Skp2	32	6.26405e-05	6.32928e-05	8.15621e-05	0.000105138
St7	114	7.61019e-05	7.62505e-05	4.05113e-05	0.000105097
Rpl7	147	0.000100558	0.000101368	8.76801e-05	0.00010502
Klhl29	78	5.70975e-05	5.68311e-05	2.70705e-05	0.00010494
Dnajb3	97	6.53254e-05	6.51261e-05	3.97366e-05	0.000104927
Ms4a14	54	7.63071e-05	7.54634e-05	4.86718e-05	0.000104901
Psma3	94	6.71133e-05	6.70674e-05	3.78028e-05	0.000104898
Nos1ap	110	7.82517e-05	7.84153e-05	0.000106184	0.000104845
Cst6	182	0.000134249	0.000135975	0.00015526	0.000104713
Clpb	124	8.60575e-05	8.71579e-05	8.20981e-05	0.000104692
Shd	74	7.28049e-05	7.16095e-05	3.74131e-05	0.000104674
Mcm5	83	0.000101027	0.000100821	7.63445e-05	0.000104596
Fgd2	158	0.00010431	0.000105737	0.000162825	0.000104593
Nthl1	58	5.23111e-05	5.21132e-05	3.05364e-05	0.000104246
Gpr180	153	0.000101977	0.000102725	9.6384e-05	0.00010421
Serpinf1	232	0.000173496	0.000172258	9.64685e-05	0.000104197
Fkbp6	51	4.16378e-05	4.12176e-05	1.99645e-05	0.000103887
Knstrn	28	3.92687e-05	3.89075e-05	2.49706e-05	0.000103557
Zfp948	63	5.61515e-05	5.61452e-05	6.11051e-05	0.0001035
Tmem50a	115	8.0509e-05	8.13288e-05	0.000501145	0.000103476
Sap18b	124	8.41469e-05	8.46587e-05	6.01328e-05	0.000103474
Cers5	142	9.38325e-05	9.53462e-05	0.000169898	0.000103443
Cox19	77	5.38144e-05	5.34607e-05	1.95798e-05	0.000103413
4930453N24Rik	62	4.76062e-05	4.72197e-05	2.43011e-05	0.000103371
Cndp2	140	9.27603e-05	9.36372e-05	9.48732e-05	0.000103368
Ctsl	96	7.07691e-05	7.06875e-05	6.64203e-05	0.000103343
Ube2n	125	8.34044e-05	8.34863e-05	4.30632e-05	0.000103293
Rpl5	139	9.4907e-05	9.58986e-05	7.94828e-05	0.0001032
Nfe2	33	2.94491e-05	2.90762e-05	1.40987e-05	0.0001032
Plekha5	53	7.7959e-05	7.76864e-05	5.98567e-05	0.000103182
Cpne6	135	0.000200647	0.000198702	0.00011965	0.000103162
Wipf3	91	6.3219e-05	6.26541e-05	2.32566e-05	0.000103017
Sem1	84	6.41507e-05	6.42081e-05	0.000107696	0.000103014
Tmem121	87	6.36075e-05	6.3581e-05	3.80331e-05	0.000102998
Ccdc157	90	6.59095e-05	6.5466e-05	2.87195e-05	0.000102884
Eif3e	104	7.68976e-05	7.73904e-05	0.000119752	0.000102853
Gm20043	29	3.3834e-05	3.34221e-05	1.85921e-05	0.000102741
Gm12359	40	6.56864e-05	6.56764e-05	5.29546e-05	0.000102715
AW046200	141	0.000258408	0.000258315	0.000215321	0.00010267
Guca1a	186	0.000133675	0.000134772	0.000109282	0.000102608
Rtca	124	8.56934e-05	8.5285e-05	4.41973e-05	0.000102605
Krt18	93	6.63055e-05	6.63379e-05	6.24613e-05	0.000102448
Zswim4	84	5.99588e-05	5.9706e-05	2.99835e-05	0.000102338
Sapcd2	40	6.60341e-05	6.5581e-05	4.24354e-05	0.000102198
Serp2	76	6.60644e-05	6.63342e-05	5.288e-05	0.000102133
Ap4m1	131	8.65489e-05	8.62323e-05	5.49284e-05	0.000102117
Ube2f	35	3.65831e-05	3.65766e-05	2.21399e-05	0.000102016
Tm2d3	174	0.000119386	0.000119704	0.00014897	0.000101971
Cfap61	306	0.000649726	0.000651003	0.00062442	0.000101889
Ndufs5	80	5.99261e-05	5.9817e-05	3.54879e-05	0.000101754
Cphx1	54	7.01509e-05	6.97003e-05	4.57801e-05	0.000101724
Riiad1	127	8.20538e-05	8.18904e-05	3.73501e-05	0.000101661
Ddost	131	8.94827e-05	9.04323e-05	7.4671e-05	0.000101529
Fam221a	60	4.60103e-05	4.52412e-05	1.80383e-05	0.0001015
Gm14317	512	0.000572293	0.000568499	0.000462446	0.000101495
Slc7a8	71	0.000113328	0.000114491	0.00014979	0.000101194
Cd47	125	8.53453e-05	8.6135e-05	9.22342e-05	0.000101023
Lst1	58	4.79802e-05	4.74886e-05	2.11142e-05	0.000100977
Sdhaf4	109	7.43819e-05	7.44383e-05	4.40165e-05	0.000100947
Gla	115	7.91203e-05	7.87219e-05	4.20203e-05	0.000100927
Zpbp2	40	4.1593e-05	4.1033e-05	2.03664e-05	0.000100776
Ebp	71	5.85753e-05	5.8242e-05	5.37496e-05	0.000100671
Gch1	77	6.24855e-05	6.22825e-05	0.000118686	0.000100645
Gm8430	133	9.25872e-05	9.30749e-05	6.89335e-05	0.000100633
Eif3i	135	9.27324e-05	9.3926e-05	0.000123482	0.000100614
Mrpl41	50	4.44696e-05	4.45318e-05	4.12536e-05	0.000100545
Glrx3	98	6.97091e-05	6.97357e-05	5.37344e-05	0.00010042
Lgals3bp	158	0.000104458	0.000105837	0.000279837	0.000100395
Ghr	86	6.44176e-05	6.45078e-05	0.000180185	0.000100391
Tlr13	382	0.000742823	0.000744699	0.000831857	0.000100347
Ntm	49	4.3322e-05	4.31589e-05	2.25098e-05	0.000100321
Epcam	92	6.86975e-05	6.86307e-05	8.98847e-05	0.000100229
Rasd2	85	6.49408e-05	6.48242e-05	5.04358e-05	0.000100214
Gtf2e2	151	0.000101369	0.000101908	6.76164e-05	0.000100211
Rap1b	154	0.000104023	0.000105018	9.65896e-05	0.000100167
Serinc1	173	0.000118103	0.00011935	0.00019193	0.000100051
Btf3	81	6.12912e-05	6.13532e-05	4.11137e-05	0.000100024
Clec2e	48	7.62015e-05	7.60144e-05	6.07582e-05	9.99302e-05
Slc12a8	62	0.000109727	0.000108228	7.14216e-05	9.98944e-05
Ggct	156	0.000110681	0.000111134	7.24075e-05	9.98755e-05
H2-Q5	30	2.91937e-05	2.88206e-05	1.48413e-05	9.98753e-05
Smoc1	111	7.53427e-05	7.56528e-05	4.40253e-05	9.98246e-05
Immp1l	101	6.96577e-05	6.95226e-05	4.0509e-05	9.9806e-05
Ndufs6	124	8.45424e-05	8.45348e-05	5.38912e-05	9.97807e-05
Gria1	28	3.41231e-05	3.39574e-05	2.42705e-05	9.97488e-05
Mif	50	4.55303e-05	4.53733e-05	4.94009e-05	9.9657e-05
Rps9	133	9.18192e-05	9.30307e-05	9.81653e-05	9.94731e-05
Pigk	112	7.62723e-05	7.66642e-05	4.47469e-05	9.94236e-05
Rpl13	124	8.6182e-05	8.71936e-05	7.69299e-05	9.93455e-05
Pld3	142	9.79925e-05	9.91974e-05	9.80666e-05	9.92058e-05
Arap3	461	0.000879655	0.000881963	0.000891287	9.90852e-05
C87198	42	4.16573e-05	4.13001e-05	3.11336e-05	9.88974e-05
Gprc5b	66	5.17554e-05	5.1069e-05	2.40972e-05	9.88676e-05
Cyc1	141	9.75852e-05	9.79631e-05	6.7832e-05	9.88348e-05
Lclat1	114	7.85653e-05	7.87653e-05	5.10506e-05	9.87132e-05
Art5	67	4.79722e-05	4.73014e-05	1.69109e-05	9.86683e-05
Pcbd2	92	6.53136e-05	6.52455e-05	3.95103e-05	9.86162e-05
Ppargc1b	37	4.2955e-05	4.22425e-05	2.22459e-05	9.85449e-05
Mrpl12	63	5.32563e-05	5.29361e-05	3.84064e-05	9.84887e-05
Wls	157	0.000105427	0.000106903	0.000156614	9.8443e-05
Gm30238	68	5.0836e-05	5.02956e-05	1.92935e-05	9.84327e-05
Naaladl2	97	7.39159e-05	7.26661e-05	2.60512e-05	9.82898e-05
Tmed2	160	0.000110101	0.000111575	0.000135457	9.7853e-05
Sfr1	84	6.21694e-05	6.21126e-05	9.38012e-05	9.78299e-05
Gm7160	15	2.3059e-05	2.2946e-05	1.76503e-05	9.77317e-05
Folr2	45	3.71927e-05	3.60706e-05	1.26403e-05	9.76855e-05
Rsph9	87	6.35082e-05	6.36977e-05	3.43979e-05	9.74998e-05
Brap	177	0.000120761	0.000122281	0.000118575	9.73242e-05
Zfp791	62	0.000116154	0.000116431	0.000112446	9.72837e-05
Pon3	126	8.62217e-05	8.67937e-05	6.33794e-05	9.71809e-05
Lrrc74a	230	0.00042188	0.000423642	0.000478807	9.71358e-05
9430060I03Rik	74	8.98935e-05	8.88313e-05	5.03461e-05	9.71187e-05
Saraf	158	0.00010817	0.000109238	0.000113041	9.71052e-05
Crhr1	66	7.54167e-05	7.55498e-05	6.56588e-05	9.71047e-05
Trnt1	52	5.63654e-05	5.6171e-05	5.05171e-05	9.69755e-05
Mrps18a	63	5.35339e-05	5.35245e-05	0.000100542	9.68215e-05
Dpm1	112	7.65013e-05	7.6631e-05	3.71181e-05	9.68207e-05
Maea	148	0.000104339	0.000105545	0.000165469	9.6717e-05
Atp5o	94	6.82256e-05	6.81237e-05	3.6355e-05	9.66488e-05
Scg3	120	9.42776e-05	9.45224e-05	8.32843e-05	9.64848e-05
Gm4786	119	8.41893e-05	8.46311e-05	5.96249e-05	9.63213e-05
A630076J17Rik	113	0.000236254	0.000237053	0.000265291	9.5985e-05
Baalc	69	4.98288e-05	4.93958e-05	2.12078e-05	9.59795e-05
Ttc36	546	0.000936179	0.000934064	0.000809169	9.55613e-05
Mrpl48	75	5.41575e-05	5.39863e-05	2.49462e-05	9.55596e-05
Chrna7	37	4.09794e-05	4.0683e-05	2.86598e-05	9.54007e-05
Sppl2a	135	9.20017e-05	9.21193e-05	5.02784e-05	9.53525e-05
Stoml2	79	6.02895e-05	6.03407e-05	3.47118e-05	9.53457e-05
Ahr	35	3.48332e-05	3.40006e-05	1.52269e-05	9.53402e-05
Upk1a	650	0.000881301	0.000870099	0.000478132	9.53329e-05
Ndfip1	103	7.5071e-05	7.53177e-05	0.000120442	9.53169e-05
Mir670hg	58	9.02818e-05	9.01638e-05	8.06259e-05	9.52757e-05
Clptm1l	142	9.66235e-05	9.70141e-05	5.65953e-05	9.52653e-05
Klhl41	41	3.39615e-05	3.36648e-05	1.56504e-05	9.51549e-05
Cyp2d34	35	3.85688e-05	3.82895e-05	2.39215e-05	9.51303e-05
Rps11	111	7.9106e-05	7.92834e-05	5.01187e-05	9.50894e-05
Fbxl21	165	0.000112285	0.000113746	0.00014148	9.50814e-05
Orai1	70	5.21719e-05	5.19574e-05	3.62373e-05	9.50342e-05
Kcnk1	140	9.53776e-05	9.64442e-05	8.90456e-05	9.50322e-05
Tspan15	156	0.000107051	0.000108045	0.000114972	9.4991e-05
Endog	122	8.24924e-05	8.28274e-05	8.87361e-05	9.49858e-05
Gm40983	26	3.32534e-05	3.29903e-05	4.34554e-05	9.48853e-05
Lrtm1	23	3.16584e-05	3.12252e-05	1.93008e-05	9.48495e-05
Ucp2	168	0.000116474	0.000118439	0.000335997	9.47017e-05
Ndufa11	67	5.24688e-05	5.23334e-05	2.89229e-05	9.4684e-05
Edil3	50	6.85301e-05	6.81352e-05	7.52507e-05	9.46134e-05
Cdipt	177	0.000122512	0.000123858	0.000269541	9.45798e-05
Mmp7	170	0.000123394	0.00012401	8.55662e-05	9.44673e-05
Ndufab1	58	4.81269e-05	4.79504e-05	3.68182e-05	9.43818e-05
Csnk2a2	93	7.13364e-05	7.14318e-05	6.64379e-05	9.41893e-05
Rbm34	89	6.58016e-05	6.57328e-05	5.01761e-05	9.41639e-05
Pno1	75	5.78969e-05	5.7997e-05	6.79129e-05	9.41486e-05
Iqcj	47	6.94523e-05	6.90795e-05	5.8106e-05	9.39649e-05
Tor3a	106	7.48775e-05	7.56372e-05	0.000424705	9.39507e-05
Akr1a1	94	7.0621e-05	7.06861e-05	7.34909e-05	9.39365e-05
Zfp595	27	3.7965e-05	3.75632e-05	2.29246e-05	9.38868e-05
Tram1	165	0.000114664	0.000116281	0.000196154	9.38867e-05
Syt5	116	8.19183e-05	8.23676e-05	8.72064e-05	9.38717e-05
Ppp1r35	99	7.04644e-05	7.05476e-05	4.22957e-05	9.37465e-05
Ehbp1	61	9.98603e-05	9.95818e-05	8.26091e-05	9.36554e-05
A230077H06Rik	35	3.78734e-05	3.76137e-05	2.1272e-05	9.35887e-05
Slc6a19	104	7.1523e-05	7.14015e-05	4.62461e-05	9.35712e-05
Elob	67	5.40699e-05	5.40879e-05	4.96545e-05	9.35679e-05
Matk	138	0.000277646	0.000275818	0.000204994	9.35635e-05
Rbm38	50	0.000100543	9.96056e-05	7.30951e-05	9.34568e-05
D030047H15Rik	153	0.000102615	0.000100338	2.5887e-05	9.34296e-05
Shisa7	51	6.3437e-05	6.23682e-05	3.08262e-05	9.33817e-05
Gm40264	48	3.89721e-05	3.85893e-05	1.82061e-05	9.32264e-05
Tm9sf4	119	7.7554e-05	7.74053e-05	3.343e-05	9.32021e-05
Rps27a	126	8.87401e-05	8.89488e-05	5.79728e-05	9.31193e-05
Gm12174	135	9.39682e-05	9.46659e-05	7.43506e-05	9.31131e-05
Snord7	23	2.29596e-05	2.27064e-05	1.20245e-05	9.31035e-05
Cd14	272	0.000607267	0.000608714	0.000661484	9.30859e-05
Nfia	67	0.000111097	0.000112515	0.000160624	9.29996e-05
Trpc1	104	7.24197e-05	7.2072e-05	3.2431e-05	9.29227e-05
Timm8b	80	5.89245e-05	5.88676e-05	3.43113e-05	9.29095e-05
Mettl23	95	6.68975e-05	6.63609e-05	2.90309e-05	9.29037e-05
Adamts3	55	8.05674e-05	7.98958e-05	5.92531e-05	9.28981e-05
Serinc2	100	7.20221e-05	7.26096e-05	0.000117383	9.26925e-05
Pfkfb4	81	5.44607e-05	5.40597e-05	1.95402e-05	9.26778e-05
Rala	60	4.80859e-05	4.7816e-05	2.31194e-05	9.24357e-05
Snrpe	103	7.24829e-05	7.24531e-05	4.09531e-05	9.23767e-05
Isca2	65	4.72385e-05	4.68181e-05	1.87807e-05	9.21786e-05
Itfg1	117	8.38131e-05	8.44538e-05	6.17251e-05	9.21234e-05
Phldb3	101	6.83975e-05	6.77881e-05	2.99671e-05	9.20654e-05
Pfdn4	68	5.8248e-05	5.8106e-05	2.98472e-05	9.20456e-05
Supt4b	68	5.4307e-05	5.40132e-05	2.51892e-05	9.20012e-05
Ndn	110	7.7855e-05	7.77724e-05	7.51421e-05	9.19525e-05
Cacna1i	275	0.000235886	0.000233542	0.000108839	9.19155e-05
Col18a1	36	3.905e-05	3.90364e-05	3.04019e-05	9.19062e-05
Spindoc	158	0.000110434	0.000110868	8.13556e-05	9.18674e-05
Adam23	93	6.38825e-05	6.38244e-05	2.87801e-05	9.18491e-05
Eif4e3	94	7.0699e-05	7.0985e-05	0.000108344	9.18273e-05
G430095P16Rik	94	8.09173e-05	7.90581e-05	2.58857e-05	9.15687e-05
Gm36660	421	0.00063157	0.000623969	0.000352472	9.1508e-05
Atp6v0e2	120	8.38874e-05	8.4617e-05	6.57315e-05	9.13831e-05
Nabp2	102	7.201e-05	7.19355e-05	3.40321e-05	9.13436e-05
Zfp82	101	7.09683e-05	7.08685e-05	3.77264e-05	9.12978e-05
Hnrnpll	62	4.8034e-05	4.76002e-05	2.02207e-05	9.12211e-05
Chm	138	9.42477e-05	9.45627e-05	6.25114e-05	9.11615e-05
Ubald1	79	5.81791e-05	5.81285e-05	4.6401e-05	9.11447e-05
Zfp597	57	5.8598e-05	5.87108e-05	4.10627e-05	9.11342e-05
H2-K1	96	7.17802e-05	7.17091e-05	6.91085e-05	9.10443e-05
Nudt9	118	7.90579e-05	7.92425e-05	5.02278e-05	9.09419e-05
Rpl19	121	8.61046e-05	8.69877e-05	7.27736e-05	9.08944e-05
Gm41253	24	4.20327e-05	4.15736e-05	2.76694e-05	9.07492e-05
Mphosph6	166	0.000115562	0.000116855	0.000129352	9.07324e-05
Gm14154	59	4.84224e-05	4.81281e-05	2.39898e-05	9.04274e-05
Psenen	53	4.71903e-05	4.71016e-05	3.95451e-05	9.04271e-05
H2-D1	97	7.10517e-05	7.11815e-05	6.13466e-05	9.0357e-05
Mrpl54	66	5.2635e-05	5.26438e-05	4.11306e-05	9.02628e-05
Wdr25	50	7.74314e-05	7.68208e-05	4.54704e-05	9.01354e-05
Tle1	170	0.000121311	0.000123401	0.000226286	9.00583e-05
Camk2n2	73	5.75056e-05	5.74172e-05	5.99817e-05	9.00405e-05
Idnk	48	4.31534e-05	4.31023e-05	3.39916e-05	9.00136e-05
Tmem116	38	3.84355e-05	3.82464e-05	2.54689e-05	9.00016e-05
Arpc4	112	7.6707e-05	7.646e-05	3.57034e-05	8.99488e-05
Sele	478	0.000526661	0.000519951	0.000259726	8.99044e-05
Zim1	87	6.05516e-05	6.00175e-05	2.62274e-05	8.96862e-05
4930523C07Rik	133	8.69861e-05	8.71687e-05	7.50556e-05	8.96861e-05
Zcchc9	100	7.07311e-05	7.07735e-05	4.38873e-05	8.949e-05
n-R5s134	14	1.97939e-05	1.95455e-05	1.24472e-05	8.94609e-05
Bnip2	115	8.18722e-05	8.26383e-05	6.5564e-05	8.94254e-05
Rab34	113	7.84717e-05	7.90266e-05	4.80455e-05	8.93605e-05
Mapk12	52	4.4561e-05	4.44107e-05	2.26577e-05	8.92046e-05
Rpl7a	118	8.33286e-05	8.41727e-05	6.40592e-05	8.91762e-05
E2f1	140	9.43093e-05	9.40513e-05	4.68697e-05	8.91555e-05
Gm5617	85	5.9989e-05	5.97148e-05	3.04001e-05	8.91417e-05
Rpl10a	102	7.59187e-05	7.62598e-05	8.85625e-05	8.91069e-05
Gsto2	48	5.99135e-05	5.99863e-05	5.0415e-05	8.90677e-05
Snora78	51	4.31071e-05	4.27043e-05	1.97357e-05	8.90308e-05
Jagn1	104	7.38405e-05	7.37303e-05	4.67239e-05	8.89162e-05
Thg1l	184	0.000137289	0.000138734	0.000134356	8.87748e-05
Sac3d1	67	4.89275e-05	4.85745e-05	2.00079e-05	8.86971e-05
Serpine1	47	3.8254e-05	3.788e-05	1.8585e-05	8.86179e-05
Trir	134	9.53816e-05	9.60472e-05	7.66667e-05	8.84826e-05
Amz2	103	7.66575e-05	7.72664e-05	0.000168782	8.84259e-05
Hypk	98	6.84563e-05	6.8043e-05	4.04461e-05	8.82898e-05
Npepl1	95	7.52307e-05	7.52244e-05	0.000339624	8.82777e-05
A830011K09Rik	124	0.000243455	0.00024225	0.000190016	8.82451e-05
Ctsb	76	6.10553e-05	6.11318e-05	0.000219584	8.82391e-05
Dapp1	100	0.000205612	0.000208404	0.000306552	8.82145e-05
Pax5	41	8.66322e-05	8.64931e-05	7.3887e-05	8.81013e-05
Smpd1	122	8.59996e-05	8.67108e-05	6.8076e-05	8.79165e-05
Arhgef6	63	4.87507e-05	4.8239e-05	2.27376e-05	8.7782e-05
Cntfr	44	8.09653e-05	8.07203e-05	6.89424e-05	8.76891e-05
Msl3l2	107	7.30468e-05	7.34759e-05	4.28495e-05	8.7688e-05
Nme9	46	4.00698e-05	3.978e-05	2.1977e-05	8.74835e-05
Ccdc184	72	6.14932e-05	6.13497e-05	0.000143675	8.74255e-05
Stx18	135	9.31197e-05	9.41631e-05	0.000101711	8.73683e-05
Tmx1	122	8.62704e-05	8.68133e-05	6.18694e-05	8.73422e-05
Zfp965	103	7.18367e-05	7.17248e-05	4.34537e-05	8.73154e-05
Tmem242	130	9.13318e-05	9.14891e-05	6.30694e-05	8.72646e-05
Ufsp1	126	8.55839e-05	8.56836e-05	4.95184e-05	8.71765e-05
Gm867	481	0.00123967	0.00124413	0.00132376	8.7161e-05
Gm15396	42	3.87791e-05	3.84602e-05	1.94588e-05	8.716e-05
Alkbh2	109	7.51976e-05	7.51688e-05	4.08145e-05	8.70454e-05
C4bp-ps1	137	0.000221316	0.000217183	0.000117272	8.70187e-05
Muc4	86	6.03593e-05	6.05327e-05	3.37621e-05	8.69257e-05
H2-K2	119	8.49979e-05	8.5249e-05	6.71558e-05	8.68654e-05
Grin1	105	7.86931e-05	7.907e-05	0.000136605	8.6805e-05
Foxn1	80	6.33979e-05	6.2534e-05	3.47048e-05	8.67867e-05
Tmed4	157	0.000108444	0.000110391	0.000462379	8.6708e-05
Uba3	103	7.61138e-05	7.62965e-05	0.000117199	8.67071e-05
Hcrtr1	30	5.3261e-05	5.26747e-05	3.53411e-05	8.66245e-05
C1ql3	124	8.41503e-05	8.43173e-05	5.24336e-05	8.65898e-05
Pcgf1	78	5.67529e-05	5.64433e-05	2.69734e-05	8.65697e-05
Tmem203	103	7.09035e-05	7.13547e-05	4.38542e-05	8.64278e-05
Bscl2	120	8.55867e-05	8.56574e-05	6.94733e-05	8.6243e-05
Gm12618	103	7.4348e-05	7.47875e-05	5.81748e-05	8.62404e-05
Txlnb	49	3.78732e-05	3.73541e-05	1.47267e-05	8.61474e-05
Nckap5	57	4.39028e-05	4.35226e-05	1.87786e-05	8.61448e-05
Spred3	88	6.35963e-05	6.37181e-05	3.57145e-05	8.61279e-05
Gm15743	160	0.000346227	0.000344923	0.000292449	8.60969e-05
Ndufa6	99	7.37264e-05	7.38515e-05	8.06805e-05	8.60788e-05
Surf4	120	8.54302e-05	8.61711e-05	6.70157e-05	8.60033e-05
Gdf11	32	4.69238e-05	4.67128e-05	3.85241e-05	8.59787e-05
Egr2	90	0.000191913	0.000192062	0.000206295	8.5863e-05
Fads3	434	0.000623858	0.000627284	0.00104534	8.57305e-05
Pfdn1	84	6.15204e-05	6.14927e-05	3.49255e-05	8.56801e-05
Agfg2	71	6.03433e-05	6.0296e-05	3.90778e-05	8.55633e-05
Gm34558	23	2.41802e-05	2.38468e-05	1.32761e-05	8.55167e-05
Bms1	155	0.000105703	0.000106619	7.69658e-05	8.54501e-05
Ap2s1	72	6.07028e-05	6.07001e-05	8.64193e-05	8.54183e-05
Diaph3	51	4.08571e-05	4.03621e-05	1.66882e-05	8.54141e-05
4930473H19Rik	132	0.000109789	0.000108993	7.03284e-05	8.53748e-05
Cd151	104	7.84432e-05	7.85087e-05	8.58174e-05	8.53161e-05
Ptprn	125	8.55206e-05	8.6318e-05	6.51367e-05	8.53048e-05
Lrpap1	112	8.19898e-05	8.28282e-05	0.000115866	8.52927e-05
Tmem126a	64	5.16767e-05	5.1616e-05	3.18126e-05	8.51899e-05
Map2k3	58	4.84032e-05	4.82975e-05	5.93321e-05	8.51839e-05
Mpp2	75	5.97869e-05	5.96722e-05	7.62999e-05	8.5152e-05
Gm5854	118	8.46045e-05	8.522e-05	5.97057e-05	8.50006e-05
Shld2	66	5.46886e-05	5.43924e-05	2.74437e-05	8.49396e-05
Lor	59	5.13291e-05	5.13379e-05	5.3432e-05	8.47143e-05
Ptprk	88	5.98833e-05	5.96898e-05	2.90338e-05	8.47009e-05
Gm15762	68	0.000122357	0.000122488	0.000127615	8.46368e-05
Maff	50	4.96376e-05	4.98221e-05	5.01156e-05	8.4633e-05
Mindy3	91	6.40914e-05	6.38318e-05	2.65829e-05	8.45623e-05
Ace3	41	3.58436e-05	3.54332e-05	1.7773e-05	8.4546e-05
Dhrs1	154	0.000107995	0.000108611	0.000121024	8.45064e-05
Slc12a3	39	6.1182e-05	6.084e-05	4.442e-05	8.44802e-05
5033406O09Rik	63	5.22409e-05	5.20991e-05	3.79841e-05	8.43121e-05
Mnd1-ps	306	0.000275214	0.000273339	0.000145559	8.43098e-05
Stk39	129	8.98796e-05	9.0527e-05	6.79998e-05	8.42781e-05
Cst3	148	0.00010471	0.00010525	9.66147e-05	8.41567e-05
Rpl18a	124	8.88964e-05	8.94381e-05	6.71645e-05	8.41516e-05
Crybg1	54	4.8612e-05	4.87134e-05	3.26047e-05	8.4106e-05
Emc4	87	6.44006e-05	6.44352e-05	3.9078e-05	8.41028e-05
Tmem60	60	5.19274e-05	5.19793e-05	3.42384e-05	8.406e-05
D8Ertd738e	72	5.70222e-05	5.69779e-05	6.0713e-05	8.39889e-05
Fgfr1op	84	6.21072e-05	6.1756e-05	2.65901e-05	8.39872e-05
3110053B16Rik	58	8.80459e-05	8.77166e-05	6.19959e-05	8.38892e-05
BC004004	89	6.54842e-05	6.53811e-05	3.8946e-05	8.38292e-05
Wsb2	94	7.16889e-05	7.18247e-05	0.000131085	8.37993e-05
Mrpl15	114	7.6893e-05	7.70502e-05	4.52036e-05	8.36645e-05
Selenok	110	7.45531e-05	7.46995e-05	3.53614e-05	8.36602e-05
Fkbp9	117	8.28089e-05	8.34653e-05	7.49431e-05	8.36508e-05
Mirt1	97	6.57852e-05	6.54287e-05	3.20639e-05	8.35887e-05
Eef1akmt4	98	6.93906e-05	6.94971e-05	3.37361e-05	8.34962e-05
Slc1a2	120	8.45081e-05	8.28703e-05	2.6475e-05	8.34812e-05
Tfr2	65	0.000112559	0.000112682	0.000129808	8.34489e-05
Atp5h	94	6.90249e-05	6.9007e-05	4.60936e-05	8.34391e-05
Adamts19	34	4.63041e-05	4.57595e-05	2.85059e-05	8.34287e-05
Gnl3	65	5.15402e-05	5.12537e-05	2.44456e-05	8.32415e-05
Gm20753	82	6.31457e-05	6.20304e-05	2.25642e-05	8.32359e-05
Bmp7	27	3.51938e-05	3.48211e-05	2.18438e-05	8.31752e-05
Galnt12	165	0.000116513	0.000117086	0.000160961	8.30648e-05
4930413F20Rik	32	2.95484e-05	2.9184e-05	1.51938e-05	8.29678e-05
Rab42	54	4.41465e-05	4.39489e-05	2.06231e-05	8.29275e-05
Rchy1	101	7.35299e-05	7.34061e-05	6.68736e-05	8.29089e-05
Slc25a3	135	9.89407e-05	9.94673e-05	8.7678e-05	8.28749e-05
Drg1	118	8.4029e-05	8.52287e-05	9.14535e-05	8.28205e-05
Ecscr	67	4.83676e-05	4.7769e-05	1.94632e-05	8.28104e-05
Mrpl30	82	6.14024e-05	6.13156e-05	3.62783e-05	8.27863e-05
Gper1	108	0.000169269	0.000169245	0.000151858	8.27786e-05
Uqcr10	89	6.654e-05	6.6825e-05	5.65893e-05	8.27138e-05
Cilp	24	3.51712e-05	3.45764e-05	1.79815e-05	8.26823e-05
Stx8	123	8.73958e-05	8.79361e-05	5.73355e-05	8.26436e-05
Cggbp1	105	7.41815e-05	7.40479e-05	3.61072e-05	8.26063e-05
Antxr1	230	0.00019149	0.000189998	0.000103788	8.2574e-05
Gm10451	62	0.000104345	0.000103241	6.97811e-05	8.24867e-05
Impg1	33	3.80601e-05	3.76109e-05	2.34557e-05	8.247e-05
Rprml	51	4.33912e-05	4.31342e-05	2.67496e-05	8.24263e-05
Gimap9	104	8.98115e-05	8.92847e-05	4.97713e-05	8.23706e-05
1700042O10Rik	214	0.000413396	0.000410723	0.000300719	8.22698e-05
Ctnna2	72	5.28674e-05	5.2487e-05	2.06747e-05	8.22184e-05
Ahi1	98	7.34452e-05	7.34179e-05	5.16729e-05	8.21395e-05
Alcam	113	8.20274e-05	8.24364e-05	6.71327e-05	8.21039e-05
Pomp	74	5.78961e-05	5.79194e-05	3.60375e-05	8.20713e-05
AI413582	51	4.51185e-05	4.50891e-05	2.69935e-05	8.19571e-05
Madcam1	242	0.00055775	0.000560691	0.000585043	8.1868e-05
Nfkb2	95	6.82217e-05	6.83306e-05	5.63155e-05	8.18133e-05
Fam3c	69	5.73178e-05	5.75017e-05	0.000168773	8.17625e-05
Ndufb4	59	4.7805e-05	4.77517e-05	2.72678e-05	8.16933e-05
Ccl8	349	0.000765138	0.000755346	0.00049107	8.16726e-05
Klhl31	110	0.000175155	0.000171987	8.86747e-05	8.16705e-05
Mrps31	86	6.17201e-05	6.12309e-05	2.62962e-05	8.16409e-05
Tmem9	131	9.39958e-05	9.46982e-05	0.000144628	8.16034e-05
Ppp1r2-ps3	44	5.34066e-05	5.30958e-05	3.78073e-05	8.15711e-05
Pigp	68	5.21367e-05	5.20268e-05	2.7462e-05	8.15546e-05
Rgr	63	0.000139931	0.000139667	0.000113907	8.14323e-05
Kdelr3	144	0.000118971	0.000119738	0.000135572	8.12686e-05
Cr1l	156	0.00011217	0.000112079	9.93351e-05	8.1232e-05
Yipf5	121	8.60582e-05	8.61619e-05	8.82443e-05	8.12291e-05
Hk1	113	9.20949e-05	9.07713e-05	4.00597e-05	8.11933e-05
Tbca	71	5.43051e-05	5.42206e-05	3.16825e-05	8.11896e-05
Tceal5	141	9.71553e-05	9.73213e-05	5.59567e-05	8.11594e-05
Zfp369	44	6.89325e-05	6.86719e-05	5.08534e-05	8.09853e-05
Psmd8	67	5.37311e-05	5.38496e-05	3.82946e-05	8.09336e-05
Bmyc	130	9.42196e-05	9.48877e-05	7.25439e-05	8.09274e-05
Carns1	65	4.55983e-05	4.48677e-05	1.53129e-05	8.08507e-05
Rtcb	129	9.11739e-05	9.14254e-05	6.3511e-05	8.07248e-05
Slc25a4	92	7.1283e-05	7.14547e-05	8.58801e-05	8.07092e-05
Ifi27	121	8.40518e-05	8.43769e-05	4.88085e-05	8.06942e-05
Slc14a2	158	0.000123219	0.000122518	6.44858e-05	8.04529e-05
1110018N20Rik	95	6.82724e-05	6.78204e-05	3.11465e-05	8.03631e-05
Ufd1	132	9.49505e-05	9.54273e-05	7.23629e-05	8.03545e-05
Twistnb	118	8.48054e-05	8.53854e-05	0.000142748	8.02128e-05
Oacyl	395	0.000467343	0.00046835	0.000676402	8.01947e-05
N4bp2	43	6.85251e-05	6.80048e-05	4.41971e-05	8.01513e-05
Tmem130	100	7.23013e-05	7.24075e-05	4.34165e-05	8.00526e-05
Mpnd	107	7.94443e-05	7.96873e-05	7.31315e-05	7.99368e-05
Mlf2	99	7.56677e-05	7.56771e-05	6.9357e-05	7.98964e-05
Gm33263	57	8.94202e-05	8.94117e-05	7.51364e-05	7.97956e-05
Cradd	117	7.90551e-05	7.88199e-05	3.55672e-05	7.97778e-05
Gm41653	36	3.73294e-05	3.70952e-05	2.24141e-05	7.97291e-05
Taf9	72	5.84468e-05	5.81312e-05	2.86058e-05	7.97073e-05
Sv2b	76	5.8736e-05	5.84796e-05	5.26878e-05	7.95889e-05
BC035044	21	3.39137e-05	3.35459e-05	2.10376e-05	7.95639e-05
Arl3	73	6.5638e-05	6.58513e-05	0.000255908	7.956e-05
Xpa	110	7.80755e-05	7.81827e-05	5.37209e-05	7.95474e-05
Olfr851	220	0.00048941	0.000490173	0.000523191	7.95155e-05
Gm12669	103	7.59632e-05	7.6452e-05	4.93367e-05	7.94734e-05
Hr	137	0.000109476	0.000108464	8.60295e-05	7.92125e-05
Rhov	54	5.92049e-05	5.93325e-05	4.59998e-05	7.91956e-05
Gm6034	128	0.000104286	0.000103614	5.40169e-05	7.9192e-05
3632454L22Rik	181	0.000141434	0.000140699	9.26761e-05	7.91502e-05
Zfp982	152	0.00011849	0.000117896	7.5751e-05	7.89729e-05
Col27a1	47	4.5875e-05	4.59415e-05	3.16965e-05	7.89642e-05
Nefh	71	0.000123155	0.000123618	0.000121528	7.8929e-05
Nt5m	51	3.8106e-05	3.74158e-05	1.3199e-05	7.88692e-05
Cnot9	76	5.35683e-05	5.29015e-05	1.80421e-05	7.8781e-05
Kcnd3	101	0.000197186	0.000196146	0.000145426	7.86142e-05
Slc30a4	63	5.31941e-05	5.30265e-05	5.15349e-05	7.85859e-05
Gm20522	64	4.70626e-05	4.66468e-05	1.80252e-05	7.85415e-05
Cd24a	140	9.82848e-05	9.86489e-05	9.42407e-05	7.85265e-05
Gm38388	43	6.62295e-05	6.60474e-05	5.31062e-05	7.845e-05
Prkcz	116	8.59692e-05	8.63643e-05	6.85981e-05	7.84474e-05
Lrpprc	89	6.91625e-05	6.90857e-05	8.53989e-05	7.84443e-05
Babam2	113	8.42982e-05	8.494e-05	8.04804e-05	7.8376e-05
Cck	41	4.01991e-05	3.99886e-05	3.27345e-05	7.83453e-05
Abcc2	85	6.08928e-05	6.06508e-05	4.23902e-05	7.83313e-05
[truncated: 15,831 more rows]
