# Supplementary material
Source: publisher figshare collection journal article supplement (https://diabetesjournals.figshare.com/articles/dataset/_/24379414)
Supplement: Supplementary file 3 [file 1]

**Supplemental Table 11. Primer sequences used for the quantitative real-time PCR analysis.**

| <b>Gene</b>    | <b>Forward primer</b>  | <b>Reverse primer</b>   |
|----------------|------------------------|-------------------------|
| <i>Aldh1a3</i> | GGGTCACACTGGAGCTAGGA   | CTGGCCTCTTCTTGGCGAA     |
| <i>Anxa10</i>  | ATGTTTTGCGGGGAATATGTCC | CAATCAGCATGTCTTTGTTGCAG |
| <i>Cdh1</i>    | GCTCTCATCATCGCCACAGA   | TTCGAGGTTCTGGGATGGGA    |
| <i>Ins1</i>    | GAAGTGGAGGACCCACAAGTG  | CTGAAGGTCCCCGGGGCT      |
| <i>Ins2</i>    | TGCTGATGCCCTGGCCTGCTCT | CTGGTCCCACATATGCACATGCA |
| <i>MafA</i>    | AGGAGGAGGTCATCCGACTG   | CTTCTCGCTCTCCAGAATGTG   |
| <i>Pdx1</i>    | GAAGAGCCCAACCGCGT      | TTGTTTTCTCGGGTTCCG      |
| <i>Ppib</i>    | GGCTCCGTCGTCTTCCTTTT   | ACTCGTCCTACAGATTCATCTCC |
| <i>Slc2a2</i>  | TCAGAAGACAAGATCACCGGA  | GCTGGTGTGACTGTAAGTGGG   |
