# Supplementary material
Source: publisher figshare collection journal article supplement (https://diabetesjournals.figshare.com/articles/dataset/_/24379414)
Supplement: Supplementary file 4 [file 1]

**Supplemental Table 2. Marker genes used for cell type annotation.**

| Seurat cluster          | Cell type   | Marker Gene       | Reference                                    |
|-------------------------|-------------|-------------------|----------------------------------------------|
| 0, 1, 2, 6, 7, 8, 9, 12 | $\beta$     | <i>Ins1, Ins2</i> | (Segerstolpe et al., 2016; Xin et al., 2016) |
| 3, 5, 14                | $\alpha$    | <i>Gcg</i>        | (Segerstolpe et al., 2016; Xin et al., 2016) |
| 4                       | $\delta$    | <i>Sst</i>        | (Segerstolpe et al., 2016; Xin et al., 2016) |
| 10                      | Endothelial | <i>Plvap</i>      | (Segerstolpe et al., 2016)                   |
| 11                      | PP          | <i>Ppy</i>        | (Segerstolpe et al., 2016; Xin et al., 2016) |
| 13                      | MoMac       | <i>Cd74</i>       | (Segerstolpe et al., 2016)                   |
| 15                      | Stellate    | <i>Col1a2</i>     | (Segerstolpe et al., 2016)                   |
| 16                      | Ki67        | <i>Mki67</i>      | (Segerstolpe et al., 2016)                   |
| 17                      | Acinar      | <i>Prss1</i>      | (Egozi et al.; Segerstolpe et al., 2016)     |
| 18                      | Ductal      | <i>Krt19</i>      | (Segerstolpe et al., 2016)                   |
