# Supplementary material
Source: publisher figshare collection journal article supplement (https://diabetesjournals.figshare.com/articles/dataset/_/24379414)
Supplement: Supplementary file 5 [file 1]

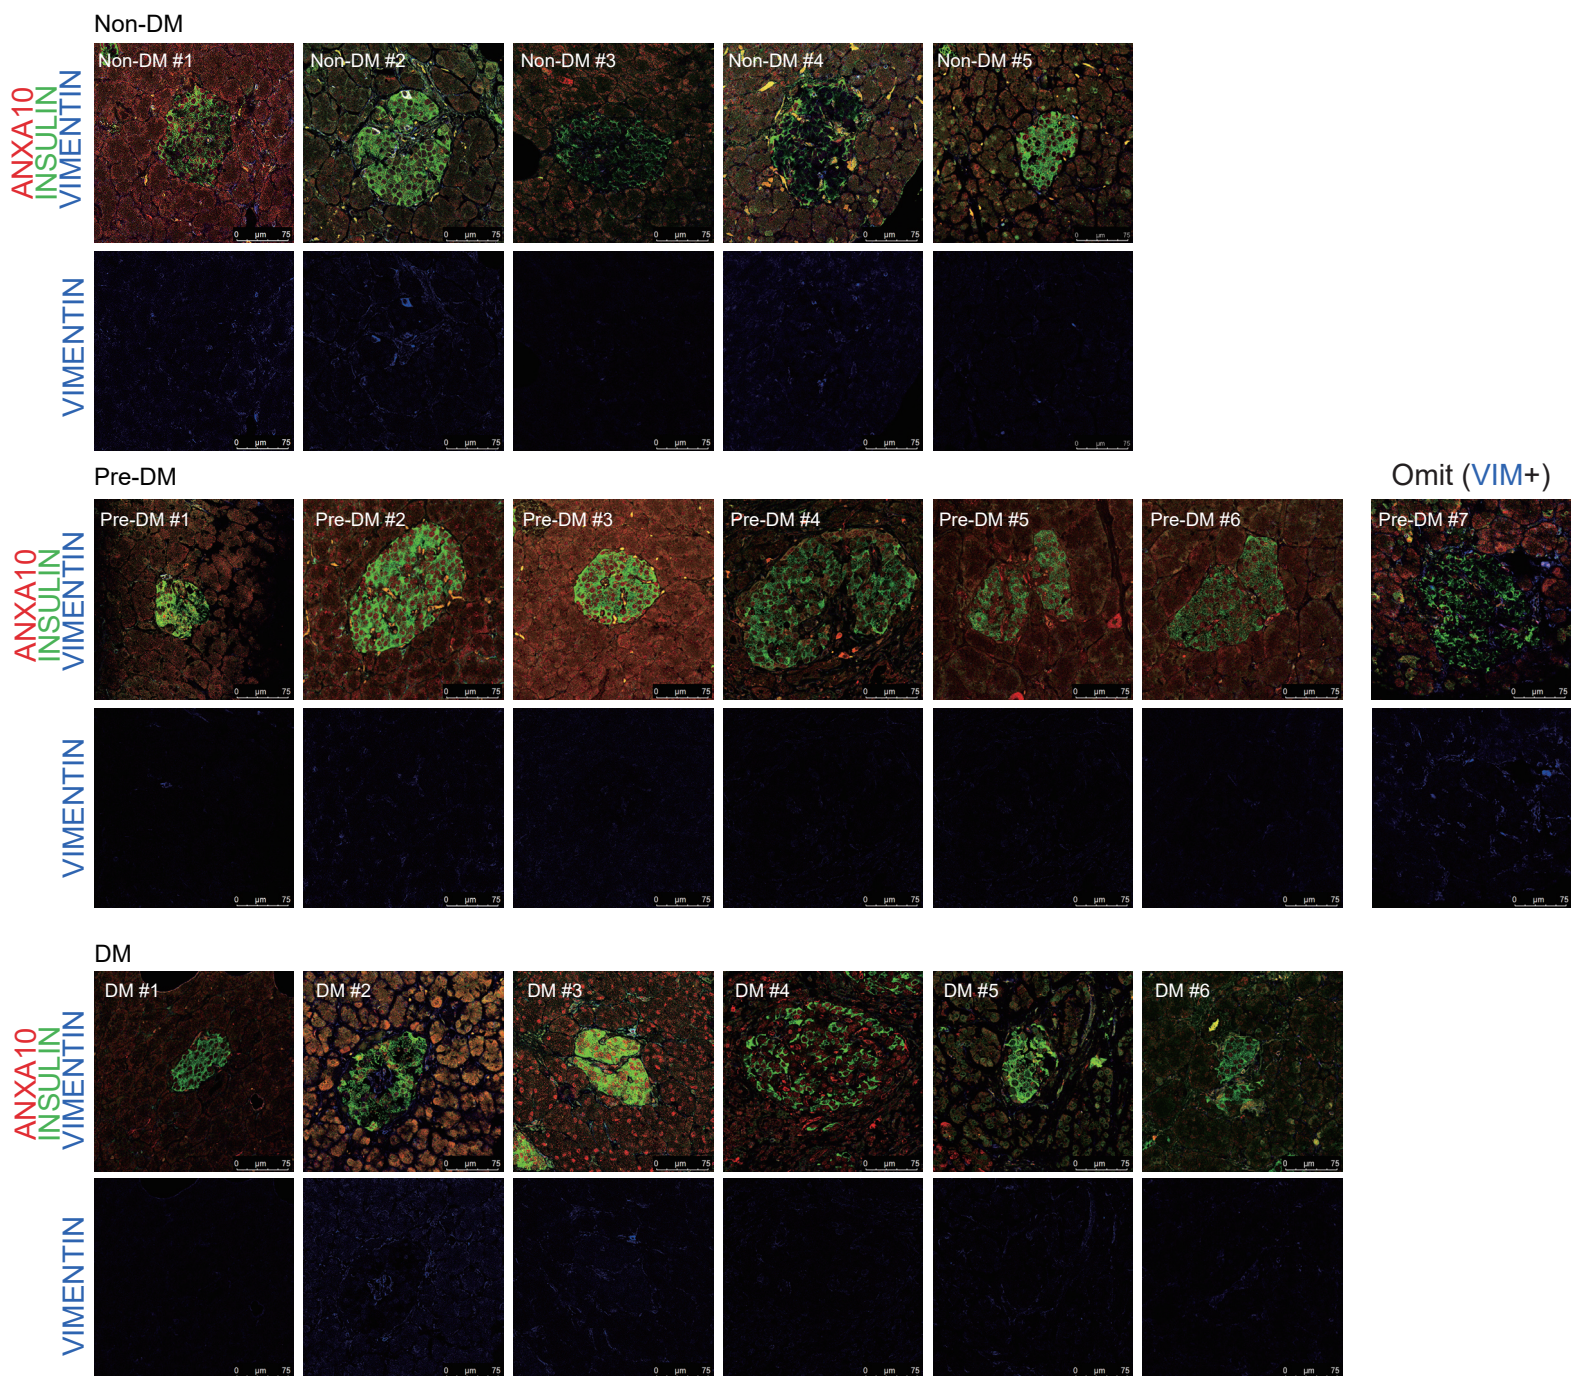

## Figure for Reviewer

Fluorescence images of pancreatic sections from pancreatic cancer patients without diabetes (non-DM), with prediabetes (pre-DM), and with diabetes (DM) that were stained with antibodies to ANXA10, insulin, VIMENTIN, and DAPI.
